# Supplementary material for: Silver-mediated formal [4π + 2 σ ] cycloaddition reactions of bicyclobutanes with nitrile imines: access to 2,3-diazobicyclo[3.1.1]heptenes
Source: Royal Society of Chemistry journal article supplement (doi:10.1039/d4sc08280j), 2025-01-01

## *Supporting Information*

# **Silver-Mediated Formal $[4\pi + 2\sigma]$ Cycloaddition Reactions of Bicyclobutanes with Nitrile Imines: Access to 2,3-Diazobicyclo[3.1.1]heptenes**

Huijuan Liao, Jianyang Dong,\* Xuechen Zhou, Qin Jiang, Zishan Lv, Fang Lei, and Dong Xue\*

Key Laboratory of Applied Surface and Colloid Chemistry, Ministry of Education, and School of Chemistry and Chemical Engineering, Shaanxi Normal University, Xi'an, 710062, China

\*Correspondence to: jydong@snnu.edu.cn; xuedong\_welcome@snnu.edu.

|                                                     |              |
|-----------------------------------------------------|--------------|
| <b>1. General information .....</b>                 | <b>2</b>     |
| <b>2. Preparation of substrates .....</b>           | <b>3</b>     |
| <b>3. Optimization of reaction conditions .....</b> | <b>4-5</b>   |
| <b>4. General procedure for reactions .....</b>     | <b>6-19</b>  |
| <b>5. Post-functionalizations .....</b>             | <b>20-23</b> |
| <b>6. Mechanistic studies .....</b>                 | <b>24</b>    |
| <b>7. X-ray crystallographic data .....</b>         | <b>25-26</b> |
| <b>8. References .....</b>                          | <b>27</b>    |
| <b>9. NMR spectra of the products.....</b>          | <b>28-66</b> |

## 1. General information

Commercially available reagents were used without further purification unless otherwise stated. All reactions were carried out under argon atmosphere with dry solvents under anhydrous conditions. All solvents were purchased from Energy Chemical and stored over molecular sieves. Analytical thin-layer chromatography (TLC) was conducted with TLC plates (Silica gel 60 F254, Qingdao Haiyang) and visualization on TLC was achieved by UV light or Phosphomolybdic acid. Flash column chromatography was performed on silica gel 200-300 mesh with freshly distilled solvents. Nuclear magnetic resonance (NMR) spectra were recorded on a Bruker 600, 400 and JEOL 400 MHz in CDCl<sub>3</sub> solvent. All chemical shifts in <sup>1</sup>H NMR spectra were given in parts per million (ppm) relative to the residual or CDCl<sub>3</sub> (7.26 ppm) as internal standards and coupling constants (*J*) were given in Hertz (Hz). <sup>13</sup>C NMR chemical shifts were reported in ppm relative to the central peak of CDCl<sub>3</sub> (77.16 ppm) as internal standards. Data are reported as follows: chemical shift, multiplicity (s = singlet, d = doublet, q = quartet, m = multiplet, dd = doublet of doublets, dt = doublet of triplets), coupling constant (Hz), and integration. HRMS data were obtained by APCI-TOF method with Bruker mass spectrometer (MAXIS).

## 2. Preparation of substrates

### 2.1 Synthesis of BCB

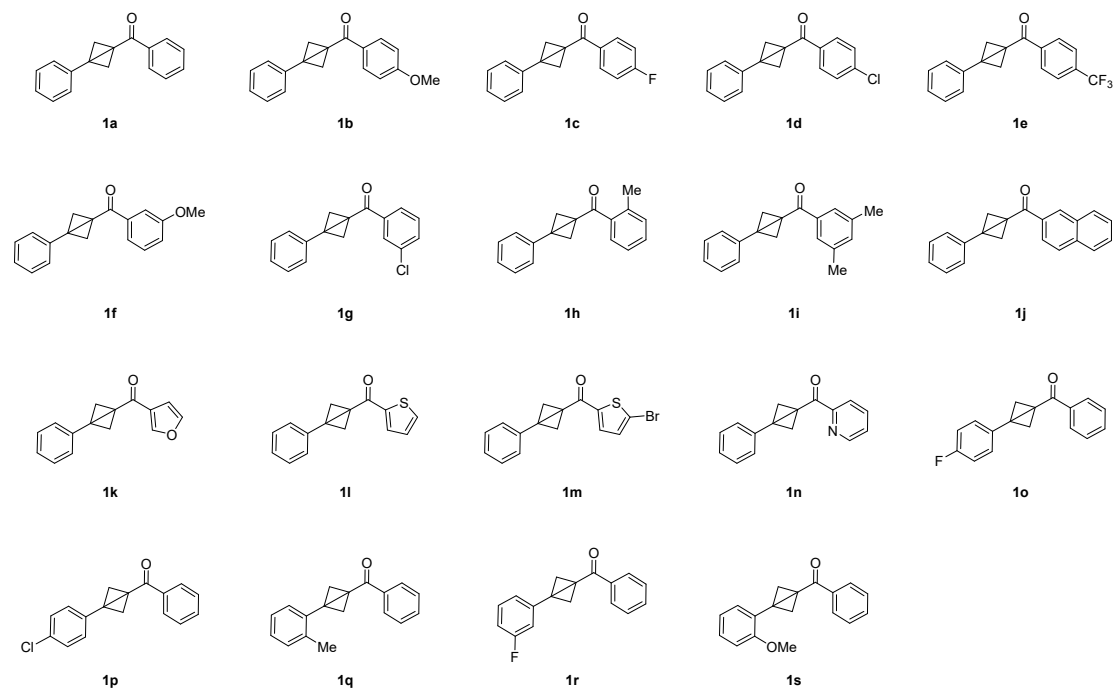

1a-1s were prepared according to the literature procedure.<sup>1</sup>

### 2.2 Synthesis of hyrazonoyl chlorides

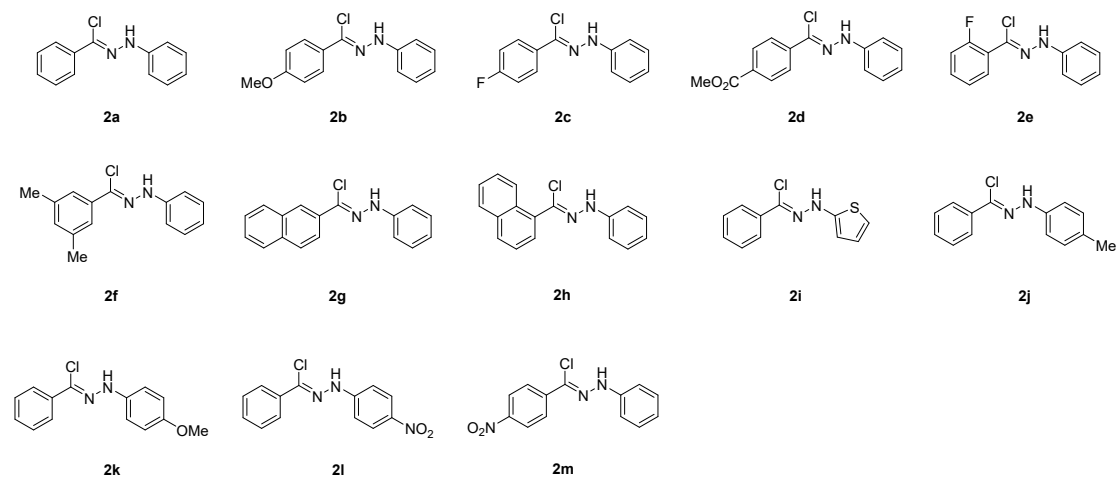

2a-2m were prepared according to the literature procedure.<sup>2,3</sup>

### 3. Optimization of reaction conditions<sup>[a]</sup>

Table S1. Optimization of reaction conditions<sup>[a]</sup>

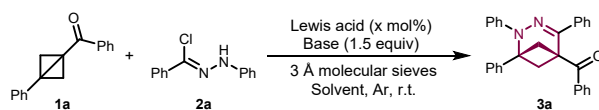

| Entry               | Lewis acid                | Base                           | Solvent           | Yield |
|---------------------|---------------------------|--------------------------------|-------------------|-------|
| 1                   | Sc(OTf) <sub>3</sub> (20) | K <sub>3</sub> PO <sub>4</sub> | DCM               | trace |
| 2                   | AgOTf (20)                | K <sub>3</sub> PO <sub>4</sub> | DCM               | 12    |
| 3                   | Eu(OTf) <sub>3</sub> (20) | K <sub>3</sub> PO <sub>4</sub> | DCM               | NR    |
| 4                   | AgBF <sub>4</sub> (20)    | K <sub>3</sub> PO <sub>4</sub> | DCM               | 15    |
| 5                   | AgBF <sub>4</sub> (50)    | K <sub>3</sub> PO <sub>4</sub> | DCM               | 20    |
| 6                   | AgBF <sub>4</sub> (100)   | K <sub>3</sub> PO <sub>4</sub> | DCM               | 34    |
| 7                   | AgBF <sub>4</sub> (100)   | Na <sub>2</sub> CO             | DCM               | 9     |
| 8                   | AgBF <sub>4</sub> (100)   | K <sub>2</sub> CO <sub>3</sub> | DCM               | 7     |
| 9                   | AgBF <sub>4</sub> (100)   | Et <sub>3</sub> N              | DCM               | NR    |
| 10                  | AgBF <sub>4</sub> (100)   | K <sub>3</sub> PO <sub>4</sub> | CH <sub>3</sub> C | NR    |
| 11                  | AgBF <sub>4</sub> (100)   | K <sub>3</sub> PO <sub>4</sub> | THF               | NR    |
| 12                  | AgBF <sub>4</sub> (100)   | K <sub>3</sub> PO <sub>4</sub> | DCE               | 33    |
| 13 <sup>[b]</sup>   | AgBF <sub>4</sub> (100)   | K <sub>3</sub> PO <sub>4</sub> | DCM               | 40    |
| 14 <sup>[b,c]</sup> | AgBF <sub>4</sub> (100)   | K <sub>3</sub> PO <sub>4</sub> | DCM               | 65    |
| 15 <sup>[b-d]</sup> | AgBF <sub>4</sub> (100)   | K <sub>3</sub> PO <sub>4</sub> | DCM               | 64    |
| 16 <sup>[b-d]</sup> | —                         | K <sub>3</sub> PO <sub>4</sub> | DCM               | NR    |
| 17 <sup>[b-d]</sup> | AgBF <sub>4</sub> (100)   | —                              | DCM               | 21    |
| 18 <sup>[b-e]</sup> | AgBF <sub>4</sub> (100)   | K <sub>3</sub> PO <sub>4</sub> | DCM               | 23    |

[a] Reaction conditions: **1a** (0.1 mmol), **2a** (0.1 mmol), Lewis acid (20–100 mol%), base (0.15 mmol), solvent (1 mL), 3 Å molecular sieves (50 mg), Ar atmosphere, room temperature (r.t.), 16 h. Yields were determined by <sup>1</sup>H NMR spectroscopy with 1,3,5-trimethoxybenzene as an internal standard. DCM, dichloromethane; NR, no reaction. [b] Reaction temperature, –10 °C. [c] 3 equiv of **1a**. [d] Reaction time, 1 h. [e] Without 3 Å molecular sieves.

**Table S2.** The screening of the temperature<sup>[a]</sup>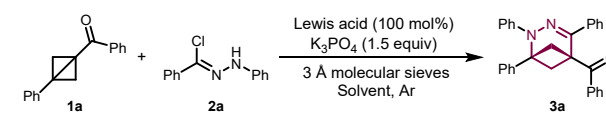

| Entry | Temperature | Yield |
|-------|-------------|-------|
| 1     | -30 °C      | 67    |
| 2     | -50 °C      | 65    |

[a] Reaction conditions: **1a** (0.3 mmol), **2a** (0.1 mmol), AgBF<sub>4</sub> (100 mol%), K<sub>3</sub>PO<sub>4</sub> (0.15 mmol), DCM (1 mL), 3 Å molecular sieves (50 mg), Ar atmosphere, 1 h. Yields were determined by <sup>1</sup>H NMR spectroscopy with 1,3,5-trimethoxybenzene as an internal standard.

**Table S3.** The screening of the amount of **2a**<sup>[a]</sup>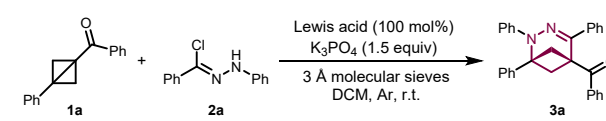

| Entry | <b>1a:2a</b> | Yield |
|-------|--------------|-------|
| 1     | 1:2          | 18    |
| 2     | 1:3          | 18    |

[a] Reaction conditions: **1a** (0.1 mmol), **2a** (0.2 or 0.3 mmol), AgBF<sub>4</sub> (100 mol%), K<sub>3</sub>PO<sub>4</sub> (0.15 mmol), DCM (1 mL), 3 Å molecular sieves (50 mg), Ar atmosphere, -10 °C, 1 h. Yields were determined by <sup>1</sup>H NMR spectroscopy with 1,3,5-trimethoxybenzene as an internal standard.

#### 4. General procedure for reactions

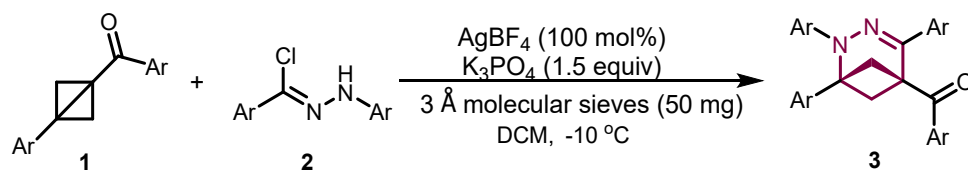

To a 10 mL reaction vial equipped with a magnetic stir bar was added compounds **1** (0.3 mmol, 3.0 equiv), **2** (0.1 mmol, 1.0 equiv),  $\text{AgBF}_4$  (100 mol%),  $\text{K}_3\text{PO}_4$  (1.5 equiv), 3 Å molecular sieves (50 mg), and the tube was evacuated and backfilled with argon three times, dry DCM (1 mL) was added under argon atmosphere. The mixture was stirred at  $-10\text{ }^\circ\text{C}$  for 1 h. Upon completion of reaction, the reaction mixture was filtered through celite pad and concentrated in vacuo to give the crude product. The crude product was purified by column chromatography on silica gel to afford **3**.

#### Phenyl((1*r*,5*r*)-1,2,4-triphenyl-2,3-diazabicyclo[3.1.1]hept-3-en-5-yl)methanone (**3a**)

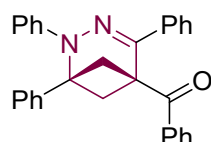

The crude product was purified by column chromatography on silica gel (PE/DCM = 1:1). yellow solid, 18 mg, 42% yield. M. P. 150–151 °C

$^1\text{H NMR}$  (400 MHz, Chloroform-*d*)  $\delta$  = 7.76 (d,  $J=7.0$ , 2H), 7.47 (d,  $J=6.8$ , 2H), 7.38 (t,  $J=7.4$ , 1H), 7.31 – 7.18 (m, 5H), 7.18 – 7.01 (m, 7H), 6.98 (t,  $J=7.3$ , 1H), 6.81 (d,  $J=7.2$ , 2H), 2.73 – 2.66 (m, 2H), 2.66 – 2.59 (m, 2H).

$^{13}\text{C NMR}$  (101 MHz, Chloroform-*d*)  $\delta$  = 199.6, 152.6, 146.0, 141.1, 137.2, 134.9, 133.2, 129.1, 128.4, 128.4, 128.2, 128.0, 127.9, 127.1, 126.7, 126.3, 125.0, 67.3, 52.7, 33.6.

HRMS (APCI-TOF)  $m/z$ :  $[\text{M} + \text{H}]^+$  Calcd for  $\text{C}_{30}\text{H}_{25}\text{N}_2\text{O}$   $[\text{M} + \text{H}]^+$  429.1961, found 429.1964.

#### (4-Methoxyphenyl)((1*r*,5*r*)-4-(4-methoxyphenyl)-1,2-diphenyl-2,3-diazabicyclo[3.1.1]hept-3-en-5-yl)methanone (**3b**)

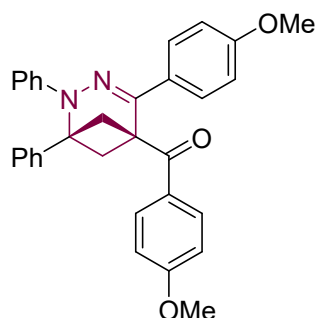

The crude product was purified by column chromatography on silica gel (PE/DCM = 1:4). yellow solid, 26 mg, 53% yield. M. P. 178–179 °C

**<sup>1</sup>H NMR (400 MHz, Chloroform-*d*)**  $\delta$  = 7.75 (d,  $J=7.3$ , 2H), 7.43 (d,  $J=7.7$ , 2H), 7.25 – 7.18 (m, 3H), 7.11 – 6.94 (m, 5H), 6.87 – 6.63 (m, 6H),  $\delta$  = 3.79 (s, 3H), 3.70 (s, 3H), 2.75 – 2.53 (m, 4H).

**<sup>13</sup>C NMR (101 MHz, Chloroform-*d*)**  $\delta$  = 198.5, 163.4, 159.5, 153.2, 146.2, 141.3, 131.5, 130.0, 128.4, 128.2, 128.1, 127.9, 127.1, 126.3, 124.9, 113.8, 113.7, 67.1, 55.5, 55.3, 52.5., 33.8.

**HRMS (APCI-TOF) m/z:** [M + H]<sup>+</sup> Calcd for C<sub>32</sub>H<sub>29</sub>N<sub>2</sub>O<sub>3</sub> [M + H]<sup>+</sup> 489.2173, found 489.2169.

**(4-Fluorophenyl)((1*r*,5*r*)-4-(4-methoxyphenyl)-1,2-diphenyl-2,3-diazabicyclo[3.1.1]hept-3-en-5-yl)methanone (3c)**

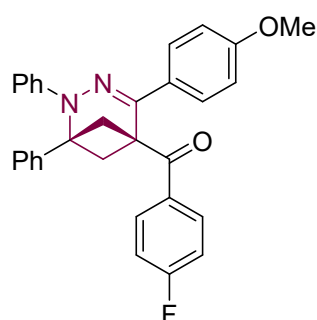

The crude product was purified by column chromatography on silica gel (PE/DCM = 1:4). yellow solid, 18 mg, 38% yield. M. P. 145–146 °C

**<sup>1</sup>H NMR (400 MHz, Chloroform-*d*)**  $\delta$  = 7.80 (dd,  $J=8.8$ , 5.4, 2H), 7.40 (d,  $J=8.9$ , 2H), 7.22 (d,  $J=2.2$ , 3H), 7.09 – 7.02 (m, 4H), 6.97 (q,  $J=8.6$ , 7.9, 3H), 6.80 (d,  $J=7.1$ , 2H), 6.69 (d,  $J=8.8$ , 2H), 3.70 (s, 3H), 2.71 – 2.56 (m, 4H).

**<sup>13</sup>C NMR (101 MHz, Chloroform-*d*)**  $\delta$  = 198.3, 165.5 (d,  $J=255.6$ ), 159.6, 152.3, 146.1, 141.2, 131.8 (d,  $J=9.3$ ), 131.4 (d,  $J=2.9$ ), 129.9, 128.4, 128.1, 128.0, 127.9, 127.1, 126.29, 125.0, 115.6 (d,  $J=22.0$ ), 113.9, 67.1, 55.3, 52.7, 33.6.

**<sup>19</sup>F NMR (376 MHz, Chloroform-*d*)**  $\delta$  = -104.29.

**HRMS (APCI-TOF) m/z:** [M + H]<sup>+</sup> Calcd for C<sub>31</sub>H<sub>26</sub>FN<sub>2</sub>O<sub>2</sub> [M + H]<sup>+</sup> 477.1973, found 477.1971.

**(4-Chlorophenyl)((1*r*,5*r*)-4-(4-methoxyphenyl)-1,2-diphenyl-2,3-diazabicyclo[3.1.1]hept-3-en-5-yl)methanone (3d)**

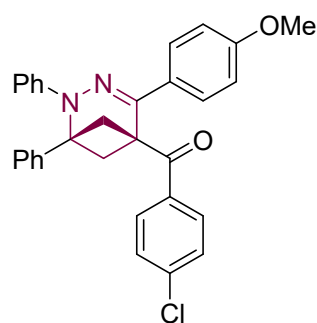

The crude product was purified by column chromatography on silica gel (PE/DCM =

1:3). yellow solid, 21.5 mg, 43% yield. M. P. 182–183 °C

**<sup>1</sup>H NMR (400 MHz, Chloroform-*d*)**  $\delta$  = 7.70 (d, *J*=8.6, 2H), 7.38 (d, *J*=8.8, 2H), 7.25 – 7.18 (m, 5H), 7.07 – 7.00 (m, 4H), 6.97 (t, *J*=7.1, 1H), 6.78 (d, *J*=7.3, 2H), 6.68 (d, *J*=8.8, 2H), 3.69 (s, 3H), 2.61 (dt, *J*=13.1, 7.6, 4H).

**<sup>13</sup>C NMR (101 MHz, Chloroform-*d*)**  $\delta$  = 198.6, 159.7, 152.1, 146.1, 141.1, 139.5, 133.2, 130.5, 129.8, 128.8, 128.4, 128.0, 128.0, 127.9, 127.0, 126.3, 125.0, 113.90, 67.1, 55.3, 52.7, 33.6.

**HRMS (APCI-TOF) m/z:** [M + H]<sup>+</sup> Calcd for C<sub>31</sub>H<sub>26</sub>ClN<sub>2</sub>O<sub>2</sub> [M + H]<sup>+</sup> 493.1677, found 493.1679.

**((1*r*,5*r*)-4-(4-methoxyphenyl)-1,2-diphenyl-2,3-diazabicyclo[3.1.1]hept-3-en-5-yl)(4-(trifluoromethyl)phenyl)methanone (3e)**

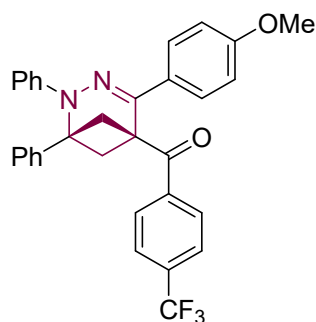

The crude product was purified by column chromatography on silica gel (PE/DCM = 1:3). yellow solid, 15 mg, 29% yield. M. P. 147–148 °C

**<sup>1</sup>H NMR (400 MHz, Chloroform-*d*)**  $\delta$  = 7.87 (d, *J*=8.0, 2H), 7.56 (d, *J*=8.1, 2H), 7.40 (d, *J*=7.0, 2H), 7.22 (s, 3H), 7.05 (t, *J*=6.8, 4H), 7.02 – 6.95 (m, 1H), 6.80 (d, *J*=7.7, 2H), 6.70 (d, *J*=7.6, 2H), 3.70 (s, 3H), 2.64 (p, *J*=7.1, 4H).

**<sup>13</sup>C NMR (101 MHz, Chloroform-*d*)**  $\delta$  = 198.9, 159.7, 151.7, 146.0, 141.0, 138.6, 134.3 (q, *J*=32.7), 129.8, 129.4, 128.4, 128.1, 128.0, 127.9, 127.1, 126.3, 125.5 (q, *J*=3.8), 125.1, 123.6 (q, *J*=270.4), 114.0, 67.1, 55.3, 52.9, 33.6.

**<sup>19</sup>F NMR (376 MHz, Chloroform-*d*)**  $\delta$  = -63.09.

**HRMS (APCI-TOF) m/z:** [M + H]<sup>+</sup> Calcd for C<sub>32</sub>H<sub>26</sub>F<sub>3</sub>N<sub>2</sub>O<sub>2</sub> [M + H]<sup>+</sup> 527.1941, found 527.1942.

**(3-Methoxyphenyl)((1*r*,5*r*)-4-(4-methoxyphenyl)-1,2-diphenyl-2,3-diazabicyclo[3.1.1]hept-3-en-5-yl)methanone (3f)**

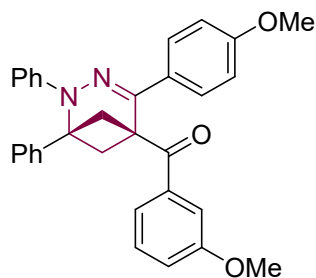

The crude product was purified by column chromatography on silica gel (PE/DCM = 1:3). yellow solid, 17 mg, 35% yield. M. P. 123–124 °C

**<sup>1</sup>H NMR (400 MHz, Chloroform-*d*)**  $\delta$  = 7.35 (d, *J*=8.5, 2H), 7.25 (d, *J*=6.2, 2H), 7.20



– 7.06 (m, 4H), 6.93 (dt,  $J=28.3$ , 8.1, 6H), 6.71 (d,  $J=7.7$ , 2H), 6.62 (d,  $J=8.5$ , 2H), 3.68 (s, 3H), 3.62 (s, 3H), 2.61 – 2.50 (m, 4H).

$^{13}\text{C}$  NMR (101 MHz, Chloroform-*d*)  $\delta$  = 199.8, 159.6, 159.6, 152.8, 146.2, 141.3, 136.3, 130.1, 129.4, 128.4, 128.1, 127.9, 127.9, 127.1, 126.3, 124.9, 121.9, 120.0, 113.9, 113.1, 67.10, 55.5, 55.3, 52.9, 33.8.

HRMS (APCI-TOF)  $m/z$ :  $[\text{M} + \text{H}]^+$  Calcd for  $\text{C}_{32}\text{H}_{29}\text{N}_2\text{O}_3$   $[\text{M} + \text{H}]^+$  489.2173, found 489.2169.

**(3-Chlorophenyl)((1*r*,5*r*)-4-(4-methoxyphenyl)-1,2-diphenyl-2,3-diazabicyclo[3.1.1]hept-3-en-5-yl)methanone (3g)**

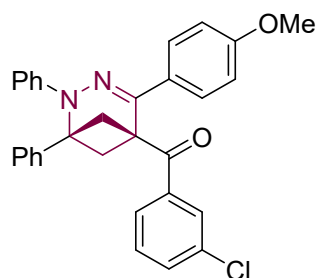

The crude product was purified by column chromatography on silica gel (PE/DCM = 1:4). yellow solid, 13 mg, 26% yield. M. P. 135–136 °C

$^1\text{H}$  NMR (400 MHz, Chloroform-*d*)  $\delta$  = 7.78 (t,  $J=1.9$ , 1H), 7.61 (d,  $J=7.8$ , 1H), 7.41 – 7.35 (m, 3H), 7.22 (dd,  $J=5.1$ , 2.8, 4H), 7.09 – 7.02 (m, 4H), 6.98 (t,  $J=7.2$ , 1H), 6.82 – 6.78 (m, 2H), 6.71 (d,  $J=8.8$ , 2H), 3.70 (s, 3H), 2.64 (dt,  $J=13.2$ , 7.4, 4H).

$^{13}\text{C}$  NMR (101 MHz, Chloroform-*d*)  $\delta$  = 198.5, 159.7, 152.1, 146.1, 141.1, 136.4, 134.7, 133.1, 129.9, 129.7, 129.1, 128.4, 128.1, 128.0, 127.9, 127.2, 127.1, 126.3, 125.0, 113.9, 67.1, 55.3, 52.8, 33.6.

HRMS (APCI-TOF)  $m/z$ :  $[\text{M} + \text{H}]^+$  Calcd for  $\text{C}_{31}\text{H}_{26}\text{ClN}_2\text{O}_2$   $[\text{M} + \text{H}]^+$  493.1677, found 493.1679.

**((1*r*,5*r*)-4-(4-methoxyphenyl)-1,2-diphenyl-2,3-diazabicyclo[3.1.1]hept-3-en-5-yl)(*o*-tolyl)methanone (3h)**

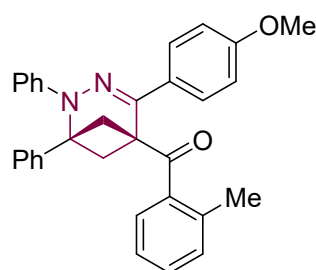

The crude product was purified by column chromatography on silica gel (PE/DCM = 1:4). yellow solid, 17 mg, 36% yield. M. P. 169–170 °C

$^1\text{H}$  NMR (400 MHz, Chloroform-*d*)  $\delta$  = 7.45 (d,  $J=9.0$ , 3H), 7.30 – 7.14 (m, 5H), 7.11 – 7.01 (m, 5H), 6.97 (t,  $J=7.2$ , 1H), 6.78 (d,  $J=7.3$ , 2H), 6.73 (d,  $J=8.8$ , 2H), 3.72 (s, 3H), 2.58 (s, 4H), 2.53 (s, 3H).

$^{13}\text{C}$  NMR (101 MHz, Chloroform-*d*)  $\delta$  = 202.6, 159.6, 153.3, 146.2, 141.4, 140.2, 134.6, 132.4, 131.9, 130.2, 129.9, 128.4, 128.4, 127.9, 127.9, 127.2, 126.4, 125.4,

124.9, 113.8, 66.7, 55.3, 53.7, 34.1, 22.1.

**HRMS** (APCI-TOF)  $m/z$ :  $[M + H]^+$  Calcd for  $C_{32}H_{29}N_2O_2$   $[M + H]^+$  473.2224, found 473.2223.

**(3,5-Dimethylphenyl)((1*r*,5*r*)-4-(4-methoxyphenyl)-1,2-diphenyl-2,3-diazabicyclo[3.1.1]hept-3-en-5-yl)methanone (3i)**

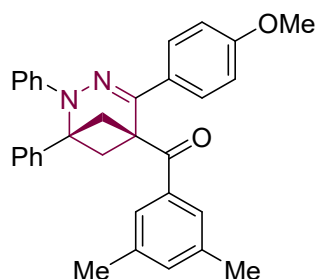

The crude product was purified by column chromatography on silica gel (PE/DCM = 1:3). yellow solid, 26 mg, 53% yield. M. P. 172–173 °C

**$^1H$  NMR (400 MHz, Chloroform-*d*)**  $\delta$  = 7.41 (d,  $J=8.8$ , 2H), 7.37 (s, 2H), 7.24 – 7.19 (m, 3H), 7.10 – 7.01 (m, 5H), 6.97 (t,  $J=7.2$ , 1H), 6.79 (d,  $J=7.7$ , 2H), 6.69 (d,  $J=8.8$ , 2H), 3.70 (s, 3H), 2.66 – 2.58 (m, 4H), 2.24 (s, 6H).

**$^{13}C$  NMR (101 MHz, Chloroform-*d*)**  $\delta$  = 200.3, 159.6, 153.4, 146.3, 141.4, 137.9, 134.9, 130.3, 128.4, 128.1, 127.9, 127.1, 127.1, 126.3, 124.9, 113.8, 67.1, 55.3, 52.9, 33.9, 21.3.

**HRMS** (APCI-TOF)  $m/z$ :  $[M + H]^+$  Calcd for  $C_{33}H_{31}N_2O_2$   $[M + H]^+$  487.2380, found 487.2380.

**((1*r*,5*r*)-4-(4-methoxyphenyl)-1,2-diphenyl-2,3-diazabicyclo[3.1.1]hept-3-en-5-yl)(naphthalen-2-yl)methanone (3j)**

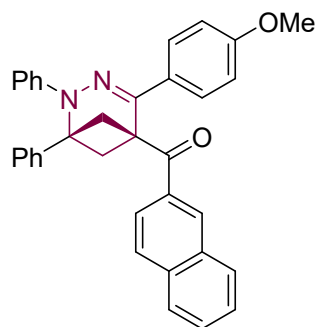

The crude product was purified by column chromatography on silica gel (PE/DCM = 1:3). yellow solid, 30 mg, 59% yield. M. P. 149–150 °C

**$^1H$  NMR (400 MHz, Chloroform-*d*)**  $\delta$  = 8.30 (s, 1H), 7.91 – 7.82 (m, 2H), 7.76 (dd,  $J=14.9$ , 8.3, 2H), 7.58 – 7.47 (m, 4H), 7.25 – 7.21 (m, 3H), 7.12 – 7.04 (m, 4H), 7.00 (t,  $J=7.3$ , 1H), 6.85 (d,  $J=7.6$ , 2H), 6.66 (d,  $J=8.8$ , 2H), 3.61 (s, 3H), 2.72 (s, 4H).

**$^{13}C$  NMR (101 MHz, Chloroform-*d*)**  $\delta$  = 199.9, 159.5, 153.0, 146.2, 141.2, 135.5, 132.4, 132.2, 131.2, 130.1, 129.8, 128.7, 128.4, 128.3, 128.1, 127.9, 127.9, 127.8, 127.1, 126.8, 126.3, 124.9, 124.5, 113.9, 67.2, 55.2, 52.9, 33.9.

**HRMS** (APCI-TOF)  $m/z$ :  $[M + H]^+$  Calcd for  $C_{35}H_{29}N_2O_2$   $[M + H]^+$  509.2224, found 509.2228.

**Furan-3-yl((1r,5r)-4-(4-methoxyphenyl)-1,2-diphenyl-2,3-diazabicyclo[3.1.1]hept-3-en-5-yl)methanone (3k)**

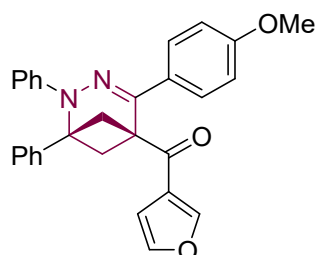

The crude product was purified by column chromatography on silica gel (PE/DCM = 1:3). yellow solid, 13 mg, 16% yield. M. P. 159–160 °C

**<sup>1</sup>H NMR (400 MHz, Chloroform-*d*)**  $\delta$  = 7.75 (s, 1H), 7.40 (d,  $J$ =8.8, 2H), 7.28 – 7.20 (m, 4H), 7.10 – 6.94 (m, 5H), 6.76 (dd,  $J$ =7.8, 5.6, 4H), 6.59 (d,  $J$ =1.9, 1H), 3.74 (s, 3H), 2.64 (dt,  $J$ =7.6, 4.0, 2H), 2.55 (dd,  $J$ =6.5, 2.4, 2H).

**<sup>13</sup>C NMR (101 MHz, Chloroform-*d*)**  $\delta$  = 194.6, 159.6, 152.4, 147.8, 146.0, 143.6, 141.0, 129.3, 128.3, 128.1, 127.9, 127.8, 127.0, 126.2, 125.4, 124.9, 113.8, 108.8, 67.0, 55.2, 53.1, 32.8.

**HRMS (APCI-TOF)  $m/z$ :**  $[M + H]^+$  Calcd for C<sub>29</sub>H<sub>25</sub>N<sub>2</sub>O<sub>3</sub>  $[M + H]^+$  449.1860, found 449.1861.

**((1r,5r)-4-(4-Methoxyphenyl)-1,2-diphenyl-2,3-diazabicyclo[3.1.1]hept-3-en-5-yl)(thiophen-2-yl)methanone (3l)**

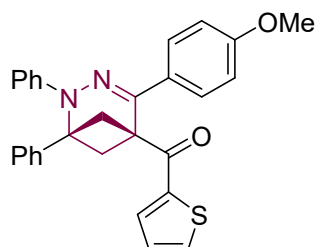

The crude product was purified by column chromatography on silica gel (PE/DCM = 1:4). yellow solid, 23 mg, 49% yield. M. P. 137–138 °C

**<sup>1</sup>H NMR (400 MHz, Chloroform-*d*)**  $\delta$  = 7.50 (d,  $J$ =4.9, 1H), 7.45 – 7.39 (m, 3H), 7.25 – 7.21 (m, 3H), 7.09 – 7.00 (m, 4H), 6.98 (d,  $J$ =7.2, 1H), 6.94 – 6.91 (m, 1H), 6.78 (d,  $J$ =7.9, 2H), 6.71 (d,  $J$ =8.7, 2H), 3.71 (s, 3H), 2.76 – 2.68 (m, 2H), 2.67 – 2.60 (m, 2H).

**<sup>13</sup>C NMR (101 MHz, Chloroform-*d*)**  $\delta$  = 192.8, 159.6, 152.8, 146.1, 142.2, 141.2, 133.8, 133.1, 129.6, 128.4, 128.2, 128.1, 128.0, 127.9, 127.1, 126.3, 125.0, 113.8, 67.2, 55.3, 52.9, 33.5.

**HRMS (APCI-TOF)  $m/z$ :**  $[M + H]^+$  Calcd for C<sub>29</sub>H<sub>25</sub>N<sub>2</sub>O<sub>2</sub>S  $[M + H]^+$  465.1631, found 465.1634.

**(5-Bromothiophen-2-yl)((1r,5r)-4-(4-methoxyphenyl)-1,2-diphenyl-2,3-diazabicyclo [3.1.1]hept-3-en-5-yl)methanone (3m)**

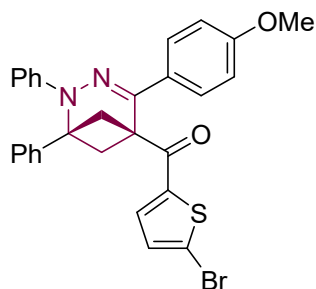

The crude product was purified by column chromatography on silica gel (PE/DCM = 1:4). yellow solid, 25 mg, 46% yield. M. P. 85–86 °C

**<sup>1</sup>H NMR (400 MHz, Chloroform-*d*)**  $\delta$  = 7.40 (d,  $J$ =8.8, 2H), 7.23 (d,  $J$ =2.4, 3H), 7.12 (d,  $J$ =4.1, 1H), 7.08 – 6.94 (m, 5H), 6.89 (d,  $J$ =4.1, 1H), 6.76 (t,  $J$ =8.5, 4H), 3.74 (s, 3H), 2.74 – 2.64 (m, 2H), 2.65 – 2.55 (m, 2H).

**<sup>13</sup>C NMR (101 MHz, Chloroform-*d*)**  $\delta$  = 191.7, 159.7, 152.1, 146.0, 143.7, 141.0, 133.2, 131.3, 129.4, 128.4, 128.1, 128.0, 127.9, 127.0, 126.3, 125.0, 123.0, 113.9, 67.3, 55.3, 52.6, 33.4.

**HRMS (APCI-TOF) m/z:** [M + H]<sup>+</sup> Calcd for C<sub>29</sub>H<sub>24</sub>BrN<sub>2</sub>O<sub>2</sub>S [M + H]<sup>+</sup> 543.0736, found 543.0737.

**((1r,5r)-4-(4-Methoxyphenyl)-1,2-diphenyl-2,3-diazabicyclo[3.1.1]hept-3-en-5-yl)(pyridin-2-yl)methanone (3n)**

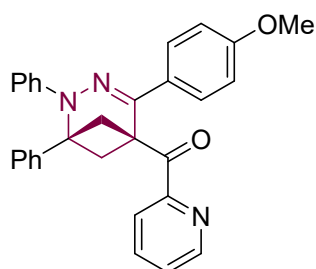

The crude product was purified by column chromatography on silica gel (PE/DCM = 1:1). yellow solid, 16 mg, 35% yield. M. P. 178–179 °C

**<sup>1</sup>H NMR (400 MHz, Chloroform-*d*)**  $\delta$  = 7.70 (d,  $J$ =8.7, 2H), 7.39 (d,  $J$ =8.8, 2H), 7.24 (dt,  $J$ =14.8, 3.7, 5H), 7.09 – 7.01 (m, 4H), 6.98 (t,  $J$ =7.1, 1H), 6.79 (d,  $J$ =7.6, 2H), 6.69 (d,  $J$ =8.7, 2H), 3.71 (s, 3H), 2.68 – 2.57 (m, 4H).

**<sup>13</sup>C NMR (101 MHz, Chloroform-*d*)**  $\delta$  = 198.5, 159.6, 152.0, 146.0, 141.0, 139.4, 133.1, 130.4, 129.7, 128.7, 128.3, 127.9, 127.9, 127.8, 126.9, 126.2, 124.9, 113.8, 67.0, 55.2, 52.6, 33.5.

**HRMS (APCI-TOF) m/z:** [M + H]<sup>+</sup> Calcd for C<sub>30</sub>H<sub>26</sub>N<sub>3</sub>O<sub>2</sub> [M + H]<sup>+</sup> 460.2020, found 460.2024.

**((1r,5r)-1-(4-Fluorophenyl)-4-(4-methoxyphenyl)-2-phenyl-2,3-diazabicyclo[3.1.1]hept-3-en-5-yl)(phenyl)methanone (3o)**

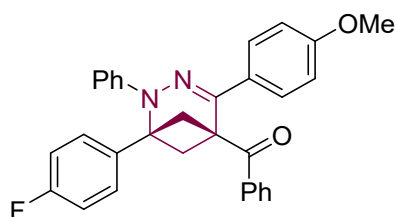

The crude product was purified by column chromatography on silica gel (PE/DCM = 1:3). yellow solid, 25 mg, 52% yield. M. P. 195–196 °C

**<sup>1</sup>H NMR (400 MHz, Chloroform-*d*)**  $\delta$  = 7.77 (d,  $J$ =7.0, 2H), 7.44 – 7.40 (m, 3H), 7.29 (t,  $J$ =7.7, 2H), 7.08 (t,  $J$ =7.5, 2H), 7.04 – 6.99 (m, 3H), 6.91 (t,  $J$ =8.6, 2H), 6.80 (d,  $J$ =7.7, 2H), 6.68 (d,  $J$ =8.8, 2H), 3.68 (s, 3H), 2.62 (m, 4H).

**<sup>13</sup>C NMR (101 MHz, Chloroform-*d*)**  $\delta$  = 199.8, 162.3 (d,  $J$ =247.1), 159.6, 152.9, 146.0, 137.2 (d,  $J$ =3.3), 134.8, 133.3, 129.9, 129.1, 128.9, 128.8, 128.4, 128.1, 128.0, 126.5, 115.4 (d,  $J$ =21.6), 113.8, 66.6, 55.3, 52.7, 33.7.

**<sup>19</sup>F NMR (376 MHz, Chloroform-*d*)**  $\delta$  = -113.55.

**HRMS (APCI-TOF) m/z:** [M + H]<sup>+</sup> Calcd for C<sub>31</sub>H<sub>26</sub>FN<sub>2</sub>O<sub>2</sub> [M + H]<sup>+</sup> 477.1973, found 477.1971.

**((1r,5r)-1-(4-Chlorophenyl)-4-(4-methoxyphenyl)-2-phenyl-2,3-diazabicyclo[3.1.1]hept-3-en-5-yl)(phenyl)methanone (3p)**

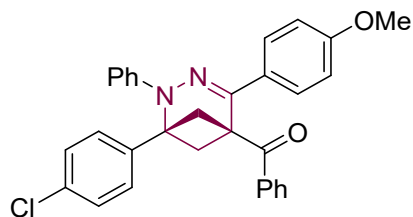

The crude product was purified by column chromatography on silica gel (PE/DCM = 1:3). yellow solid, 15 mg, 30% yield. M. P. 195–196 °C

**<sup>1</sup>H NMR (400 MHz, Chloroform-*d*)**  $\delta$  = 7.76 (d,  $J$ =7.6, 2H), 7.41 (d,  $J$ =8.6, 3H), 7.29 (t,  $J$ =7.7, 2H), 7.20 (d,  $J$ =8.1, 2H), 7.09 (t,  $J$ =7.6, 2H), 7.01 (dd,  $J$ =11.8, 7.7, 3H), 6.81 (d,  $J$ =7.7, 2H), 6.68 (d,  $J$ =8.6, 2H), 3.68 (s, 3H), 2.61 (s, 4H).

**<sup>13</sup>C NMR (101 MHz, Chloroform-*d*)**  $\delta$  = 199.7, 159.7, 152.9, 146.0, 139.9, 134.8, 133.8, 133.3, 129.8, 129.2, 128.7, 128.5, 128.5, 128.2, 128.1, 126.4, 125.2, 113.6, 66.6, 55.3, 52.6, 33.7.

**HRMS (APCI-TOF) m/z:** [M + H]<sup>+</sup> Calcd for C<sub>31</sub>H<sub>26</sub>ClN<sub>2</sub>O<sub>2</sub> [M + H]<sup>+</sup> 493.1677, found 493.1679.

**((1r,5r)-4-(4-Methoxyphenyl)-2-phenyl-1-(o-tolyl)-2,3-diazabicyclo[3.1.1]hept-3-en-5-yl)(phenyl)methanone (3q)**

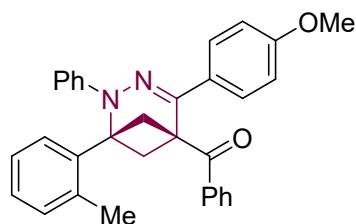

The crude product was purified by column chromatography on silica gel (PE/DCM = 1:3). yellow solid, 25.5 mg, 54% yield. M. P. 170–171 °C

**<sup>1</sup>H NMR (400 MHz, Chloroform-*d*)**  $\delta$  = 7.77 (d,  $J$ =7.0, 2H), 7.43 (d,  $J$ =8.8, 3H), 7.30 (t,  $J$ =7.7, 2H), 7.15 (t,  $J$ =7.3, 1H), 7.08 – 6.95 (m, 6H), 6.79 (d,  $J$ =7.1, 2H), 6.69 (d,  $J$ =8.8, 2H), 3.69 (s, 3H), 2.81 – 2.58 (m, 4H), 2.20 (s, 3H).

**<sup>13</sup>C NMR (101 MHz, Chloroform-*d*)**  $\delta$  = 200.1, 159.5, 152.4, 146.2, 138.9, 137.6, 135.0, 133.2, 131.1, 130.1, 129.2, 128.5, 128.4, 128.3, 128.1, 127.8, 126.0, 125.8, 124.8, 113.8, 68.0, 55.3, 52.6, 36.2, 19.8.

**HRMS (APCI-TOF) m/z:**  $[M + H]^+$  Calcd for C<sub>32</sub>H<sub>29</sub>N<sub>2</sub>O<sub>2</sub>  $[M + H]^+$  473.2224, found 473.2223.

**((1r,5r)-1,2-Diphenyl-4-(p-tolyl)-2,3-diazabicyclo[3.1.1]hept-3-en-5-yl)(phenyl)methanone (3r)**

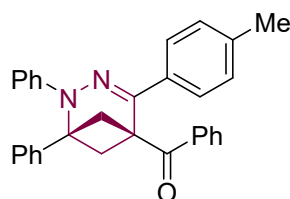

The crude product was purified by column chromatography on silica gel (PE/DCM = 1:1). yellow solid, 13 mg, 30% yield. M. P. 201–202 °C

**<sup>1</sup>H NMR (400 MHz, Chloroform-*d*)**  $\delta$  = 7.77 (d,  $J$ =7.7, 2H), 7.38 (t,  $J$ =8.2, 3H), 7.29 (t,  $J$ =7.7, 2H), 7.22 (dd,  $J$ =4.9, 1.8, 3H), 7.10 – 7.02 (m, 4H), 6.97 (dd,  $J$ =12.1, 7.5, 3H), 6.80 (dd,  $J$ =7.9, 1.8, 2H), 2.64 (dt,  $J$ =13.8, 6.9, 4H), 2.19 (s, 3H).

**<sup>13</sup>C NMR (101 MHz, Chloroform-*d*)**  $\delta$  = 199.8, 152.9, 146.1, 141.2, 138.1, 134.9, 134.4, 133.2, 129.1, 129.1, 128.4, 128.4, 127.9, 127.9, 127.1, 126.6, 126.3, 124.9, 67.2, 52.7, 33.7, 21.3.

**HRMS (APCI-TOF) m/z:**  $[M + H]^+$  Calcd for C<sub>31</sub>H<sub>27</sub>N<sub>2</sub>O  $[M + H]^+$  443.2118, found 443.2122.

**((1r,5r)-4-(4-Methoxyphenyl)-1,2-diphenyl-2,3-diazabicyclo[3.1.1]hept-3-en-5-yl)(phenyl)methanone (3s)**

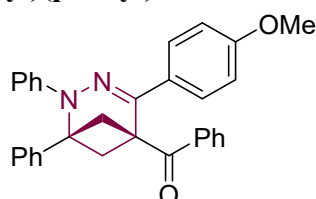

The crude product was purified by column chromatography on silica gel (PE/DCM = 1:3). yellow solid, 28 mg, 61% yield. M. P. 199–200 °C

**<sup>1</sup>H NMR (400 MHz, Chloroform-*d*)**  $\delta$  = 7.77 (d,  $J$ =7.0, 2H), 7.42 (d,  $J$ =8.8, 3H), 7.29 (t,  $J$ =7.7, 2H), 7.22 (dd,  $J$ =5.0, 1.9, 3H), 7.09 – 7.02 (m, 4H), 6.98 (t,  $J$ =7.3, 1H), 6.83 – 6.77 (m, 2H), 6.68 (d,  $J$ =8.8, 2H), 3.69 (s, 3H), 2.69 – 2.58 (m, 4H).

**<sup>13</sup>C NMR (101 MHz, Chloroform-*d*)**  $\delta$  = 200.0, 159.6, 152.8, 146.2, 141.3, 134.9, 133.2, 130.0, 129.2, 128.4, 128.4, 128.1, 127.9, 127.9, 127.1, 126.3, 124.9, 113.8, 67.1, 55.3, 52.8, 33.8.

**HRMS (APCI-TOF) m/z:** [M + H]<sup>+</sup> Calcd for C<sub>31</sub>H<sub>27</sub>N<sub>2</sub>O<sub>2</sub> [M + H]<sup>+</sup> 459.2067, found 459.2068.

**((1*r*,5*r*)-4-(4-Fluorophenyl)-1,2-diphenyl-2,3-diazabicyclo[3.1.1]hept-3-en-5-yl)(phenyl) methanone (3t)**

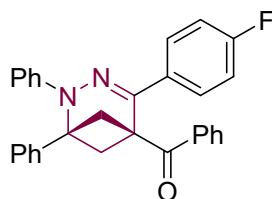

The crude product was purified by column chromatography on silica gel (PE/DCM = 1:3). yellow solid, 14 mg, 30% yield. M. P. 156–157 °C

**<sup>1</sup>H NMR (400 MHz, Chloroform-*d*)**  $\delta$  = 7.75 (d,  $J$ =7.3, 2H), 7.48 – 7.39 (m, 3H), 7.30 (t,  $J$ =7.7, 2H), 7.23 (dd,  $J$ =5.0, 1.8, 3H), 7.06 (td,  $J$ =7.8, 4.7, 4H), 6.99 (t,  $J$ =7.2, 1H), 6.90 – 6.75 (m, 4H), 2.69 (dt,  $J$ =8.0, 4.0, 2H), 2.66 – 2.57 (m, 2H).

**<sup>13</sup>C NMR (101 MHz, Chloroform-*d*)**  $\delta$  = 199.6, 162.6 (d,  $J$ =247.9), 151.5, 145.9, 141.0, 134.8, 133.4, 129.1, 128.6, 128.6, 128.5, 128.5, 128.0, 128.0, 127.1, 126.3, 125.1, 115.4 (d,  $J$ =21.7), 67.3, 52.7, 33.6.

**<sup>19</sup>F NMR (376 MHz, Chloroform-*d*)**  $\delta$  = -113.15.

**HRMS (APCI-TOF) m/z:** [M + H]<sup>+</sup> Calcd for C<sub>30</sub>H<sub>24</sub>FN<sub>2</sub>O [M + H]<sup>+</sup> 447.1867, found 447.1865.

**Methyl 4-((1*r*,5*r*)-5-benzoyl-1,2-diphenyl-2,3-diazabicyclo[3.1.1]hept-3-en-4-yl)benzoate (3u)**

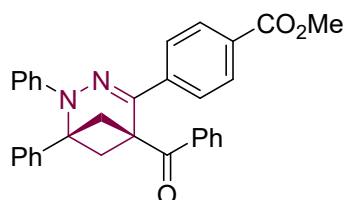

The crude product was purified by column chromatography on silica gel (PE/DCM = 1:3). yellow solid, 19.5 mg, 40% yield. M. P. 205–206 °C

**<sup>1</sup>H NMR (400 MHz, Chloroform-*d*)**  $\delta$  = 7.81 (d,  $J$ =8.2, 2H), 7.75 (d,  $J$ =7.2, 2H), 7.53 (d,  $J$ =8.3, 2H), 7.40 (t,  $J$ =7.4, 1H), 7.32 – 7.20 (m, 5H), 7.11 – 6.97 (m, 5H), 6.81 (d,  $J$ =7.8, 2H), 3.83 (s, 3H), 2.72 (dt,  $J$ =8.3, 4.1, 2H), 2.62 – 2.55 (m, 2H).

**<sup>13</sup>C NMR (101 MHz, Chloroform-*d*)**  $\delta$  = 199.3, 166.9, 150.6, 145.7, 141.4, 140.7, 134.7, 133.5, 129.7, 129.3, 129.0, 128.6, 128.5, 128.1, 128.0, 127.1, 126.5, 126.3, 125.3, 67.5, 52.5, 52.2, 33.4.

**HRMS (APCI-TOF) m/z:**  $[M + H]^+$  Calcd for  $C_{32}H_{27}N_2O_3$   $[M + H]^+$  487.2016, found 487.2021.

**((1r,5r)-4-(2-Fluorophenyl)-1,2-diphenyl-2,3-diazabicyclo[3.1.1]hept-3-en-5-yl)(phenyl)methanone (3v)**

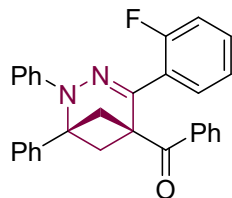

The crude product was purified by column chromatography on silica gel (PE/DCM = 1:3). yellow solid, 18.5 mg, 41% yield. M. P. 206–207 °C

**$^1H$  NMR (400 MHz, Chloroform-*d*)**  $\delta$  = 7.71 (d,  $J=7.8$ , 2H), 7.36 (q,  $J=7.0$ , 2H), 7.25 – 7.18 (m, 5H), 7.10 – 7.00 (m, 5H), 6.94 (dt,  $J=15.0$ , 7.3, 2H), 6.77 (dd,  $J=13.8$ , 8.2, 3H), 2.75 (t,  $J=6.6$ , 2H), 2.67 – 2.58 (m, 2H).

**$^{13}C$  NMR (101 MHz, Chloroform-*d*)**  $\delta$  = 198.0, 159.6 (d,  $J=246.9$ ), 149.1, 145.8, 141.1, 135.0, 133.0, 130.1, 130.0, 128.9, 128.5, 128.2, 128.1, 128.0, 127.2, 126.5, 125.5 (d,  $J=15.3$ ), 125.2, 124.2 (d,  $J=3.5$ ), 115.6 (d,  $J=21.6$ ), 67.7, 53.1, 33.0.

**$^{19}F$  NMR (376 MHz, Chloroform-*d*)**  $\delta$  = -112.43.

**HRMS (APCI-TOF) m/z:**  $[M + H]^+$  Calcd for  $C_{30}H_{24}FN_2O$   $[M + H]^+$  447.1867, found 447.1865.

**((1r,5r)-4-(3,5-Dimethoxyphenyl)-1,2-diphenyl-2,3-diazabicyclo[3.1.1]hept-3-en-5-yl)(phenyl)methanone (3w)**

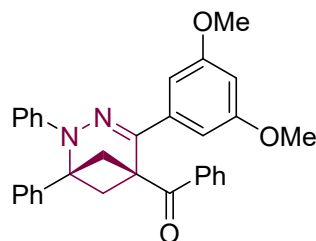

The crude product was purified by column chromatography on silica gel (PE/DCM = 1:3). yellow solid, 20 mg, 41% yield. M. P. 253–254 °C

**$^1H$  NMR (400 MHz, Chloroform-*d*)**  $\delta$  = 7.79 (d,  $J=7.3$ , 2H), 7.42 (t,  $J=7.4$ , 1H), 7.31 (t,  $J=7.7$ , 2H), 7.22 (dd,  $J=5.0$ , 1.8, 3H), 7.10 – 7.02 (m, 4H), 6.99 (t,  $J=7.2$ , 1H), 6.81 (d,  $J=7.3$ , 2H), 6.64 (d,  $J=2.2$ , 2H), 6.22 (t,  $J=2.3$ , 1H), 3.65 (s, 6H), 2.65 (ddt,  $J=30.4$ , 7.9, 5.7, 4H).

**$^{13}C$  NMR (101 MHz, Chloroform-*d*)**  $\delta$  = 199.7, 160.7, 152.4, 146.0, 141.1, 139.0, 135.0, 133.3, 128.9, 128.5, 128.4, 128.0, 127.9, 127.1, 126.3, 125.0, 104.8, 101.3, 67.3, 55.4, 52.8, 33.6.

**HRMS (APCI-TOF) m/z:**  $[M + H]^+$  Calcd for  $C_{32}H_{29}N_2O_3$   $[M + H]^+$  489.2173, found 489.2176.

**((1r,5r)-4-(Naphthalen-1-yl)-1,2-diphenyl-2,3-diazabicyclo[3.1.1]hept-3-en-5-yl)(phenyl)methanone (3x)**



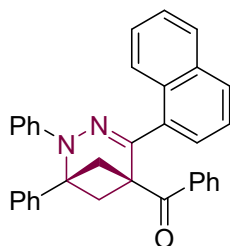

The crude product was purified by column chromatography on silica gel (PE/DCM = 1:3). yellow solid, 20 mg, 42% yield. M. P. 189–190 °C

**<sup>1</sup>H NMR (400 MHz, Chloroform-*d*)**  $\delta$  = 8.28 (d,  $J$ =8.4, 1H), 7.66 (d,  $J$ =8.1, 1H), 7.59 – 7.47 (m, 4H), 7.42 (dd,  $J$ =11.5, 7.2, 2H), 7.31 – 7.13 (m, 7H), 7.06 (t,  $J$ =7.6, 2H), 6.98 (t,  $J$ =7.7, 3H), 6.87 (d,  $J$ =7.9, 2H), 2.92 – 2.80 (m, 4H).

**<sup>13</sup>C NMR (101 MHz, Chloroform-*d*)**  $\delta$  = 199.1, 152.3, 146.0, 141.2, 135.1, 135.0, 133.8, 132.7, 131.1, 128.7, 128.5, 128.3, 128.3, 128.0, 128.0, 127.8, 127.1, 126.5, 126.4, 126.4, 126.1, 126.0, 125.0, 124.9, 67.4, 54.2, 33.4.

**HRMS (APCI-TOF) m/z:**  $[M + H]^+$  Calcd for C<sub>34</sub>H<sub>27</sub>N<sub>2</sub>O  $[M + H]^+$  479.2118, found 479.2115.

**((1r,5r)-4-(Naphthalen-2-yl)-1,2-diphenyl-2,3-diazabicyclo[3.1.1]hept-3-en-5-yl)(phenyl)methanone (3y)**

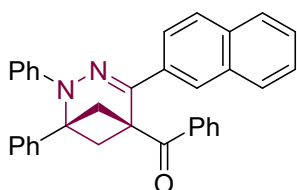

The crude product was purified by column chromatography on silica gel (PE/DCM = 1:3). yellow solid, 26 mg, 54% yield. M. P. 190–191 °C

**<sup>1</sup>H NMR (400 MHz, Chloroform-*d*)**  $\delta$  = 7.79 (s, 1H), 7.72 (d,  $J$ =7.2, 2H), 7.66 – 7.54 (m, 4H), 7.27 (dd,  $J$ =6.3, 3.3, 2H), 7.21 (t,  $J$ =7.3, 1H), 7.18 – 7.09 (m, 5H), 7.04 – 6.95 (m, 4H), 6.91 (t,  $J$ =7.2, 1H), 6.76 (d,  $J$ =7.7, 2H), 2.70 – 2.55 (m, 4H).

**<sup>13</sup>C NMR (101 MHz, Chloroform-*d*)**  $\delta$  = 199.8, 152.2, 146.0, 141.1, 134.9, 134.6, 133.2, 133.1, 133.0, 129.0, 128.4, 128.2, 128.0, 128.0, 127.6, 127.1, 126.4, 126.2, 126.2, 125.8, 125.1, 124.6, 67.4, 52.8, 33.7.

**HRMS (APCI-TOF) m/z:**  $[M + H]^+$  Calcd for C<sub>34</sub>H<sub>27</sub>N<sub>2</sub>O  $[M + H]^+$  479.2118, found 479.2115.

**((1r,5r)-1,2-Diphenyl-4-(thiophen-2-yl)-2,3-diazabicyclo[3.1.1]hept-3-en-5-yl)(phenyl)methanone (3z)**

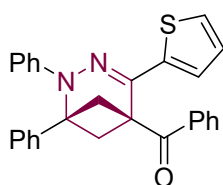

The crude product was purified by column chromatography on silica gel (PE/DCM = 1:1). white solid, 19.5 mg, 45% yield. M. P. 187–188 °C

**<sup>1</sup>H NMR (400 MHz, Chloroform-*d*)**  $\delta$  = 7.89 (d,  $J$ =7.3, 2H), 7.52 (t,  $J$ =7.3, 1H), 7.41 (t,  $J$ =7.6, 2H), 7.22 (p,  $J$ =4.0, 3H), 7.12 (d,  $J$ =4.4, 1H), 7.09 – 6.96 (m, 5H), 6.80 – 6.70 (m, 4H), 2.62 (s, 4H).

**<sup>13</sup>C NMR (101 MHz, Chloroform-*d*)**  $\delta$  = 200.1, 146.9, 145.7, 140.8, 140.1, 135.5, 133.5, 129.2, 128.7, 128.4, 128.1, 127.9, 127.4, 127.2, 126.3, 126.0, 125.8, 125.0, 67.1, 52.4, 34.0.

**HRMS (APCI-TOF) m/z:**  $[M + H]^+$  Calcd for C<sub>28</sub>H<sub>23</sub>N<sub>2</sub>OS  $[M + H]^+$  435.1526, found 435.1532.

**((1*r*,5*r*)-1,4-Diphenyl-2-(*p*-tolyl)-2,3-diazabicyclo[3.1.1]hept-3-en-5-yl)(phenyl)methanone (3aa)**

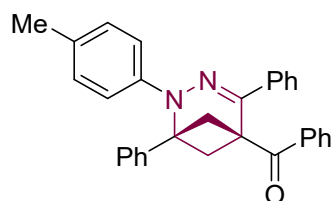

The crude product was purified by column chromatography on silica gel (PE/DCM = 1:1). yellow solid, 18 mg, 40% yield. M. P. 189–190 °C

**<sup>1</sup>H NMR (400 MHz, Chloroform-*d*)**  $\delta$  = 7.79 – 7.74 (m, 2H), 7.47 (d,  $J$ =6.9, 2H), 7.39 (t,  $J$ =7.4, 1H), 7.30 – 7.25 (m, 2H), 7.23 (dd,  $J$ =5.2, 1.9, 3H), 7.15 (t,  $J$ =7.3, 2H), 7.12 – 7.06 (m, 3H), 6.86 (d,  $J$ =8.1, 2H), 6.70 (d,  $J$ =8.4, 2H), 2.71 – 2.65 (m, 2H), 2.65 – 2.60 (m, 2H), 2.21 (s, 3H).

**<sup>13</sup>C NMR (101 MHz, Chloroform-*d*)**  $\delta$  = 199.7, 152.4, 143.6, 141.2, 137.3, 134.9, 134.7, 133.2, 129.1, 128.6, 128.4, 128.4, 128.1, 127.9, 127.1, 126.7, 126.2, 67.2, 52.7, 33.5, 21.0.

**HRMS (APCI-TOF) m/z:**  $[M + H]^+$  Calcd for C<sub>31</sub>H<sub>27</sub>N<sub>2</sub>O  $[M + H]^+$  443.2118, found 443.2122.

**((1*r*,5*r*)-2-(4-Methoxyphenyl)-1,4-diphenyl-2,3-diazabicyclo[3.1.1]hept-3-en-5-yl)(phenyl)methanone (3ab)**

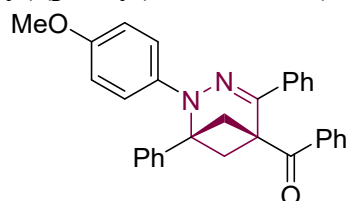

The crude product was purified by column chromatography on silica gel (PE/DCM = 1:3). yellow solid, 22 mg, 48% yield. M. P. 200–201 °C

**<sup>1</sup>H NMR (400 MHz, Chloroform-*d*)**  $\delta$  = 7.76 (d,  $J$ =7.0, 2H), 7.45 (d,  $J$ =6.8, 2H), 7.39 (t,  $J$ =7.4, 1H), 7.30 – 7.24 (m, 2H), 7.22 (dd,  $J$ =5.2, 1.9, 3H), 7.18 – 7.02 (m, 5H), 6.73 (d,  $J$ =8.9, 2H), 6.58 (d,  $J$ =8.9, 2H), 3.70 (s, 3H), 2.64 (dt,  $J$ =13.2, 6.9, 4H).

**<sup>13</sup>C NMR (101 MHz, Chloroform-*d*)**  $\delta$  = 199.7, 157.3, 152.5, 141.2, 139.4, 137.3, 134.9, 133.2, 129.1, 128.4, 128.4, 128.1, 127.9, 127.9, 127.2, 126.7, 113.2, 67.4, 55.5, 52.8, 33.4.

**HRMS (APCI-TOF) m/z:**  $[M + H]^+$  Calcd for C<sub>31</sub>H<sub>27</sub>N<sub>2</sub>O<sub>2</sub>  $[M + H]^+$  459.2067, found

459.2068.

**((1r,5r)-2-(4-Nitrophenyl)-1,4-diphenyl-2,3-diazabicyclo[3.1.1]hept-3-en-5-yl)(phenyl)methanone (3ac)**

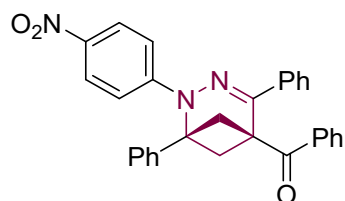

The crude product was purified by column chromatography on silica gel (PE/DCM = 1:3). yellow solid, 16 mg, 34% yield. M. P. 187–188 °C

**<sup>1</sup>H NMR (400 MHz, Chloroform-*d*)**  $\delta$  = 7.89 (d,  $J=9.2$ , 2H), 7.76 – 7.70 (m, 2H), 7.47 (d,  $J=6.5$ , 2H), 7.40 (t,  $J=7.4$ , 1H), 7.36 – 7.32 (m, 3H), 7.30 – 7.24 (m, 2H), 7.23 – 7.14 (m, 5H), 6.89 (d,  $J=9.2$ , 2H), 2.81 (dt,  $J=7.9$ , 3.9, 2H), 2.63 – 2.54 (m, 2H).

**<sup>13</sup>C NMR (101 MHz, Chloroform-*d*)**  $\delta$  = 198.86, 154.01, 151.25, 142.76, 140.16, 136.51, 134.58, 133.47, 129.19, 129.04, 128.82, 128.58, 128.52, 126.76, 126.64, 123.75, 123.06, 67.26, 52.43, 34.67.

**HRMS (APCI-TOF) m/z:** [M + H]<sup>+</sup> Calcd for C<sub>30</sub>H<sub>24</sub>N<sub>3</sub>O<sub>3</sub> [M + H]<sup>+</sup> 474.1812, found 474.1817.

## 5. Post-functionalizations

### Gram-scale synthesis of **3j** and synthetic transformations of **3ab** and **3j**

#### Gram-scale reaction

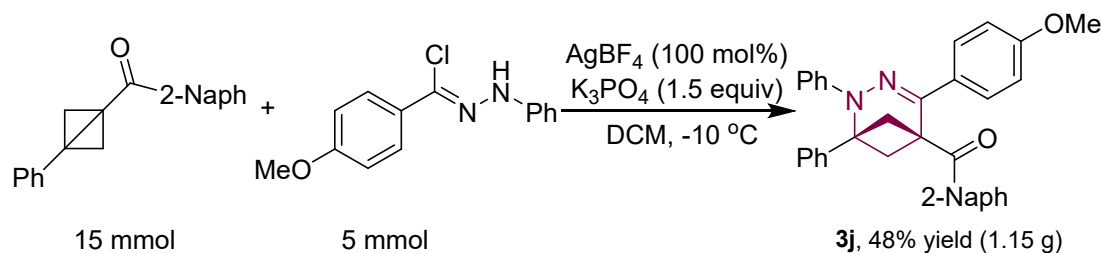

To a 100 mL reaction vial equipped with a magnetic stir bar was added compounds naphthalen-2-yl(3-phenylbicyclo[1.1.0]butan-1-yl)methanone (4.26 g, 15 mmol), (*Z*)-4-methoxy-*N*-phenylbenzohydrazonoyl chloride (1.3 g, 5 mmol), AgBF<sub>4</sub> (1 g, 5 mmol), K<sub>3</sub>PO<sub>4</sub> (1.59 g, 7.5 mmol), 3 Å molecular sieves (500 mg), and the tube was evacuated and backfilled with argon three times, dry DCM (50 mL) was added under argon atmosphere. The mixture was stirred at -10 °C for 6 h. Upon completion of reaction, the reaction mixture was filtered through celite pad and concentrated in vacuo to give the crude product. The crude product was purified by column chromatography on silica gel (PE/DCM = 1:3) to afford **3j** (1.15 g, 48% yield) as a yellow solid.

#### Further transformations

##### Reduction of ketone:

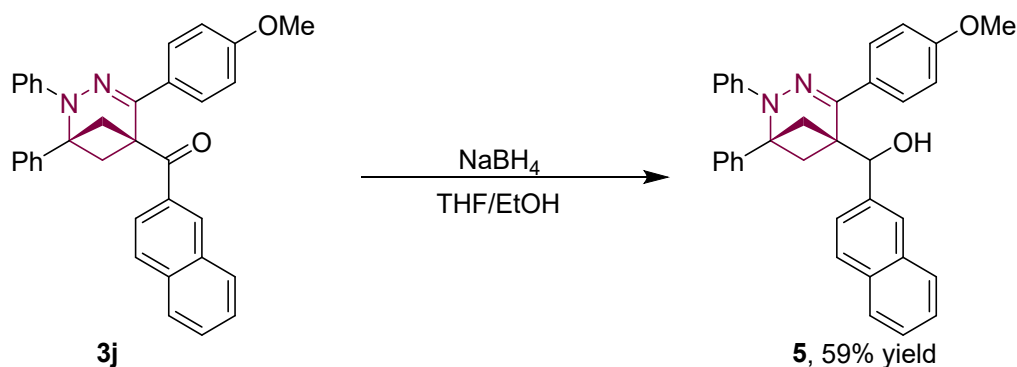

To a reaction bottle with magneton, **3j** (50.8 mg, 0.1 mmol, 1.0 equiv) was dissolved in THF and EtOH (1 mL, v/v = 1/2). Subsequently, NaBH<sub>4</sub> (18.9 mg, 0.5 mmol, 5.0 equiv) was added to the reaction mixture and stirred for two hours at room temperature.

The solvent was removed under reduced pressure and the mixture was treated with saturated aqueous NaHCO<sub>3</sub> (5 mL). The aqueous layer was extracted with EtOAc (3 × 5 mL). The combined organic extracts were dried over Na<sub>2</sub>SO<sub>4</sub> and concentrated in vacuo to give the crude product. The product was purified by column chromatography on silica gel (PE/EtOAc = 5:1) to afford **5** (30 mg, 59%) as a white solid. M. P. 226–227 °C

**((1r,5r)-4-(4-Methoxyphenyl)-1,2-diphenyl-2,3-diazabicyclo[3.1.1]hept-3-en-5-yl)(naphthalen-2-yl)methanol (**5**)**

<sup>1</sup>H NMR (400 MHz, DMSO-*d*<sub>6</sub>) δ = 7.78 (dd, J=22.5, 7.2, 3H), 7.58 – 7.49 (m, 3H), 7.49 – 7.38 (m, 2H), 7.33 (d, J=8.5, 1H), 7.15 (d, J=6.8, 3H), 7.02 – 6.84 (m, 7H), 6.62 (d, J=7.8, 2H), 5.53 (d, J=4.1, 1H), 5.21 (d, J=4.1, 1H), 3.78 (s, 3H), 2.26 (d, J=8.9, 1H), 2.18 (t, J=8.5, 1H), 2.06 (t, J=8.5, 1H), 1.65 (d, J=8.8, 1H).

<sup>13</sup>C NMR (101 MHz, DMSO-*d*<sub>6</sub>) δ = 160.2, 158.9, 146.4, 142.6, 139.9, 132.5, 132.2, 130.4, 129.9, 128.2, 127.8, 127.5, 127.4, 127.0, 126.7, 126.0, 125.7, 125.7, 124.0, 113.2, 71.1, 66.8, 55.2, 47.2, 30.9.

HRMS (APCI-TOF) m/z: [M + H]<sup>+</sup> Calcd for C<sub>35</sub>H<sub>31</sub>N<sub>2</sub>O<sub>2</sub> [M + H]<sup>+</sup> 511.2380, found 511.2387.

**Allylation of ketone:**

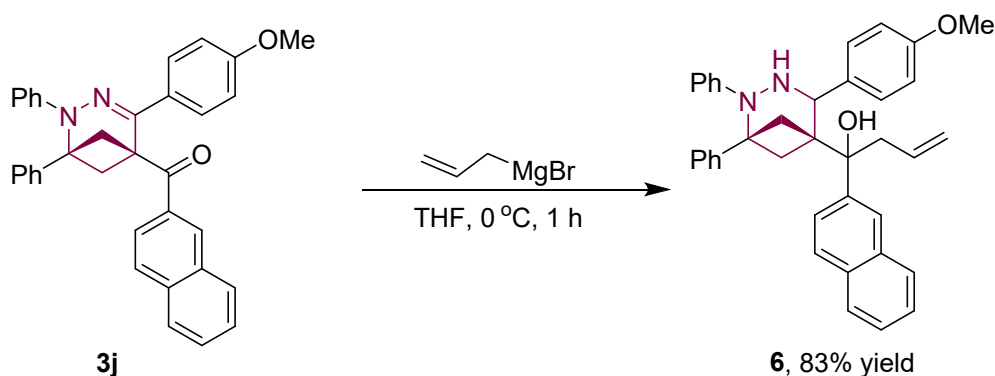

In a flame dried Schlenk flask, ketone **3j** (50.8 mg, 0.1 mmol) was stirred in anhydrous THF (1.0 mL). The solution was cooled to 0 °C and allyl-magnesium bromide (1.0 M in THF, 0.22 mL, 0.22 mmol) was added slowly. The reaction was stirred for 1 h at 0 °C before the addition of aqueous saturated NH<sub>4</sub>Cl (3 mL). The mixture was extracted with EtOAc (3×5 mL). The organic phases were washed with brine, dried over anhydrous Na<sub>2</sub>SO<sub>4</sub>, filtered and concentrated to give a crude product, which was purified by flash column chromatography on silica gel (PE/EtOAc = 7:1) to afford the corresponding allyl-alcohol **6** (46 mg, 83% yield,) as a yellow solid. M. P.

156–157 °C

**1-((1*r*,5*r*)-4-(4-Methoxyphenyl)-1,2-diphenyl-2,3-diazabicyclo[3.1.1]heptan-5-yl)-1-(naphthalen-2-yl)but-3-en-1-ol (6)**

**<sup>1</sup>H NMR (400 MHz, Chloroform-*d*)**  $\delta$  = 7.74 (d, *J*=6.8, 1H), 7.63 (d, *J*=8.6, 1H), 7.52 (d, *J*=8.6, 1H), 7.44 – 7.35 (m, 2H), 7.28 – 7.14 (m, 6H), 7.10 (d, *J*=7.7, 2H), 6.91 (dt, *J*=23.0, 7.0, 3H), 6.74 (d, *J*=7.9, 2H), 6.64 (d, *J*=7.5, 2H), 6.30 (d, *J*=8.2, 2H), 5.28 (dtd, *J*=18.5, 9.6, 5.1, 1H), 5.05 – 4.93 (m, 2H), 3.53 (s, 3H), 2.90 (dd, *J*=13.5, 5.1, 1H), 2.74 (dd, *J*=14.0, 8.7, 2H), 2.64 (dd, *J*=13.4, 9.1, 1H), 2.55 (t, *J*=8.3, 1H), 2.45 (t, *J*=8.4, 1H), 2.40 (s, 1H).

**<sup>13</sup>C NMR (101 MHz, Chloroform-*d*)**  $\delta$  = 160.5, 158.6, 146.1, 142.6, 141.2, 133.0, 132.9, 132.1, 131.7, 130.5, 128.3, 128.3, 127.7, 127.6, 127.3, 127.3, 126.4, 125.8, 125.7, 125.4, 124.7, 123.6, 120.5, 112.5, 75.5, 66.8, 55.1, 52.1, 42.4, 32.0.

**HRMS (APCI-TOF) *m/z*:** [M + H]<sup>+</sup> Calcd for C<sub>38</sub>H<sub>35</sub>N<sub>2</sub>O<sub>2</sub> [M + H]<sup>+</sup> 551.2693, found 551.2693.

***N*-butylation of ketone:**

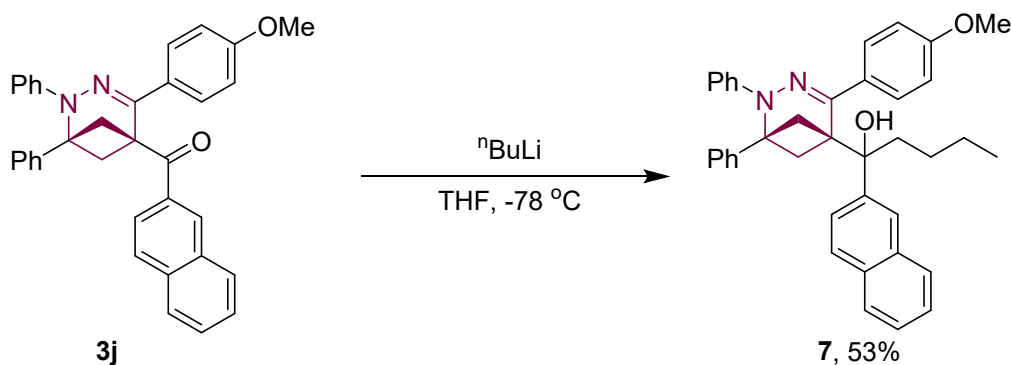

An oven-dried Schlenk tube equipped with a stir bar and charged with **3j** (50.8 mg, 0.1 mmol, 1.0 equiv.), after backfilled with N<sub>2</sub> and capped with a septum, then THF (2 mL) were added. The solution was cooled to -78 °C and *n*-BuLi (2.5 M in Hex, 0.13 mmol, 1.3 equiv.) was added. The reaction was stirred at -78 °C for 3 h before quenched with saturated NH<sub>4</sub>Cl solution. The aqueous layer was extracted with EtOAc. The combined organic layers were washed with brine, dried over anhydrous Na<sub>2</sub>SO<sub>4</sub>, filtered and concentrated by rotary evaporation. The residue was purified by flash column chromatography on silica gel (PE/EtOAc = 7:1) to afford product **7** (30 mg, 53% yield) as yellow solid. M. P. 185–186 °C

**1-((1*r*,5*r*)-4-(4-methoxyphenyl)-1,2-diphenyl-2,3-diazabicyclo[3.1.1]hept-3-en-5-yl)-1-(naphthalen-2-yl)pentan-1-ol (7)**

**<sup>1</sup>H NMR (400 MHz, Chloroform-*d*)**  $\delta$  = 7.91 – 7.84 (m, 1H), 7.75 (d, *J*=8.6, 1H), 7.68

– 7.61 (m, 1H), 7.57 – 7.47 (m, 2H), 7.41 – 7.32 (m, 4H), 7.26 – 7.19 (m, 3H), 7.03 (dt,  $J=14.5, 7.0, 3\text{H}$ ), 6.74 (d,  $J=7.4, 4\text{H}$ ), 6.37 (d,  $J=8.1, 2\text{H}$ ), 3.63 (s, 3H), 2.88 (dd,  $J=8.8, 5.3, 2\text{H}$ ), 2.69 (t,  $J=8.3, 1\text{H}$ ), 2.56 (t,  $J=8.5, 1\text{H}$ ), 2.32 (s, 1H), 2.02 (p,  $J=6.5, 5.5, 2\text{H}$ ), 1.34 – 1.10 (m, 4H), 0.79 (t,  $J=7.1, 3\text{H}$ ).

$^{13}\text{C}$  NMR (101 MHz, Chloroform-*d*)  $\delta = 160.6, 158.7, 146.0, 142.7, 141.9, 133.2, 132.0, 131.6, 130.2, 128.4, 128.3, 127.8, 127.7, 127.4, 127.4, 127.4, 126.5, 125.9, 125.6, 124.8, 123.3, 112.9, 66.7, 55.2, 52.8, 37.2, 32.5, 30.5, 25.0, 23.1, 14.1$ .

HRMS (APCI-TOF)  $m/z$ :  $[\text{M} + \text{H}]^+$  Calcd for  $\text{C}_{39}\text{H}_{39}\text{N}_2\text{O}_2$   $[\text{M} + \text{H}]^+$  567.3006, found 567.3008.

#### Synthetic transformation of **3ab**:

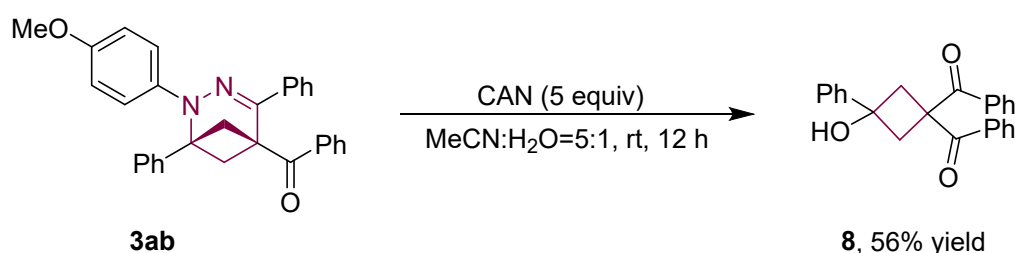

To a reaction bottle with magneton, **3ab** (50.8 mg, 0.1 mmol, 1.0 equiv) was dissolved in  $\text{CH}_3\text{CN}$  and  $\text{H}_2\text{O}$  (1 mL, v/v = 5/1). Subsequently, CAN (26.5 mg, 0.5 mmol, 5.0 equiv) was added to the reaction mixture and stirred for 12 h at room temperature. The aqueous layer was extracted with EtOAc ( $3 \times 5$  mL). The combined organic extracts were dried over  $\text{NaSO}_4$  and concentrated in vacuo to give the crude product. The product was purified by column chromatography on silica gel (PE/EtOAc = 5:1) to afford **8** (20 mg, 56%) as a white solid. M. P. 89–90 °C

#### (3-Hydroxy-3-phenylcyclobutane-1,1-diyl)bis(phenylmethanone) (**8**)

$^1\text{H}$  NMR (400 MHz, Chloroform-*d*)  $\delta = 7.88$  (d,  $J=7.8, 2\text{H}$ ),  $7.82$  (d,  $J=7.9, 2\text{H}$ ),  $7.50$  –  $7.42$  (m, 4H),  $7.36$  (t,  $J=7.6, 5\text{H}$ ),  $7.27$  (d,  $J=9.6, 2\text{H}$ ),  $3.61$  (d,  $J=13.6, 2\text{H}$ ),  $3.37$  (d,  $J=14.2, 2\text{H}$ ),  $2.61$  (s, 1H).

$^{13}\text{C}$  NMR (101 MHz, Chloroform-*d*)  $\delta = 197.9, 196.5, 145.3, 134.7, 133.7, 133.7, 129.6, 129.5, 128.8, 128.8, 128.6, 127.7, 125.0, 73.4, 57.6, 45.0$ .

HRMS (+ESI)  $m/z$ :  $[\text{M}+\text{Na}]^+$  calcd. for  $\text{C}_{24}\text{H}_{20}\text{NaO}_3$ : 379.1305; found: 379.1307.

## 6. Mechanistic studies

Control experiment: reaction without **2a**

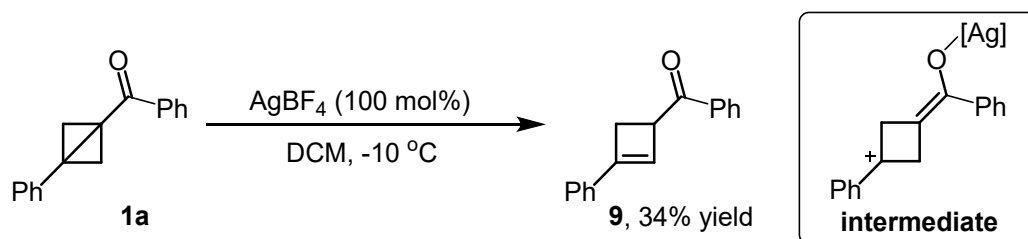

To a 10 mL reaction vial equipped with a magnetic stir bar was added compound **1a** (0.1 mmol, 1.0 equiv),  $\text{AgBF}_4$  (100 mol%), and the tube was evacuated and backfilled with argon three times. DCM (1 mL) were added under argon atmosphere. The mixture was then stirred rapidly for 1 hour. Upon completion of reaction, the reaction mixture was concentrated in vacuo to give the crude product. The crude product was purified by column chromatography on silica gel to afford **9** (8 mg, 34% yield) a yellow oil.

**$^1\text{H}$  NMR (400 MHz, Chloroform-*d*)**  $\delta$  = 8.03 (d,  $J=7.7$ , 2H), 7.59 (t,  $J=7.4$ , 1H), 7.50 (t,  $J=7.6$ , 2H), 7.43 – 7.32 (m, 4H), 7.29 (d,  $J=7.0$ , 1H), 6.49 (s, 1H), 4.49 (s, 1H), 3.19 (t,  $J=3.7$ , 2H).

**$^{13}\text{C}$  NMR (101 MHz, Chloroform-*d*)**  $\delta$  = 199.4, 147.8, 136.2, 134.0, 133.2, 128.8, 128.5, 128.4, 128.4, 125.8, 124.8, 46.0, 32.7.

**HRMS (APCI-TOF)**  $m/z$ :  $[\text{M} + \text{H}]^+$  Calcd for  $\text{C}_{17}\text{H}_{15}\text{O}$   $[\text{M} + \text{H}]^+$  235.1117, found 235.1122.



## 7. X-ray crystallographic data

The structure of **3a** were determined by the X-ray diffraction analysis of single crystal, which recrystallized from a mixed solution of CH<sub>2</sub>Cl<sub>2</sub> and *n*-pentane

Crystal data and structure refinement for **3a**.

|                                                       |                                                               |
|-------------------------------------------------------|---------------------------------------------------------------|
| Identification code                                   | <b>3a</b>                                                     |
| CCDC Deposit number                                   | 2394900                                                       |
| Empirical formula                                     | C <sub>30</sub> H <sub>24</sub> N <sub>2</sub> O              |
| Formula weight                                        | 428.51                                                        |
| Temperature/K                                         | 237.00                                                        |
| Crystal system                                        | monoclinic                                                    |
| Space group                                           | C2/c                                                          |
| <i>a</i> /Å                                           | 39.3453(15)                                                   |
| <i>b</i> /Å                                           | 6.1691(2)                                                     |
| <i>c</i> /Å                                           | 22.6081(9)                                                    |
| $\alpha$ /°                                           | 90                                                            |
| $\beta$ /°                                            | 116.888(2)                                                    |
| $\gamma$ /°                                           | 90                                                            |
| Volume/Å <sup>3</sup>                                 | 4894.3(3)                                                     |
| <i>Z</i>                                              | 8                                                             |
| $\rho_{\text{calc}}$ /cm <sup>3</sup>                 | 1.163                                                         |
| $\mu$ /mm <sup>-1</sup>                               | 0.550                                                         |
| F(000)                                                | 1808.0                                                        |
| Crystal size/mm <sup>3</sup>                          | 0.3 × 0.2 × 0.1                                               |
| Radiation                                             | CuK $\alpha$ ( $\lambda$ = 1.54178)                           |
| 2 $\Theta$ range for data collection/°                | 7.894 to 136.664                                              |
| Index ranges                                          | -46 ≤ <i>h</i> ≤ 46, -7 ≤ <i>k</i> ≤ 7, -27 ≤ <i>l</i> ≤ 27   |
| Reflections collected                                 | 36235                                                         |
| Independent reflections                               | 4481 [R <sub>int</sub> = 0.0520, R <sub>sigma</sub> = 0.0326] |
| Data/restraints/parameters                            | 4481/0/298                                                    |
| Goodness-of-fit on F <sup>2</sup>                     | 1.056                                                         |
| Final R indexes [ <i>I</i> ≥ 2 $\sigma$ ( <i>I</i> )] | R1 = 0.0345, wR2 = 0.0899                                     |
| Final R indexes [all data]                            | R1 = 0.0415, wR2 = 0.0951                                     |
| Largest diff. peak/hole / e Å <sup>-3</sup>           | 0.16/-0.15                                                    |

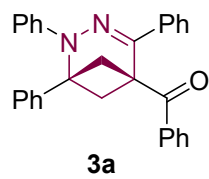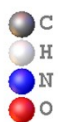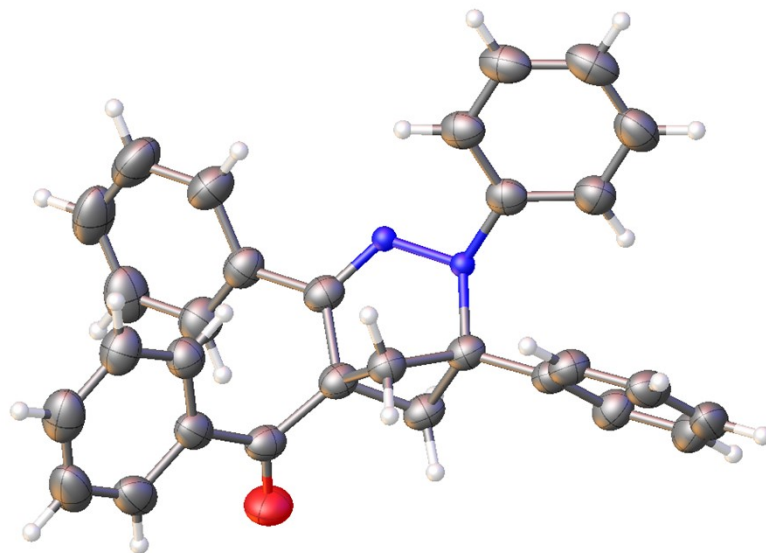

2394900)

(CC  
DC:

## 8. References

- (1) H. S. Ren, T. X. Li, J. P. Xing, Z. Y. Li, Y. X. Zhang, J. Zheng, *Org. Lett.* 2024, **26**, 8, 1745–1750.
- (2) L. K. B. Garve, M. Petzold, P. G. Jones, D. B. Werz, *Org. Lett.* 2016, **18**, 564–567.
- (3) S. Y. Du, Z. G. Yang, J. H. Tang, Z. K. Chen, X. F. Wu, *Org. Lett.* 2021, **23**, 6, 2359–2363

## 9. NMR spectra of the products

### $^1\text{H}$ NMR (400 MHz, $\text{CDCl}_3$ ) of **3a**

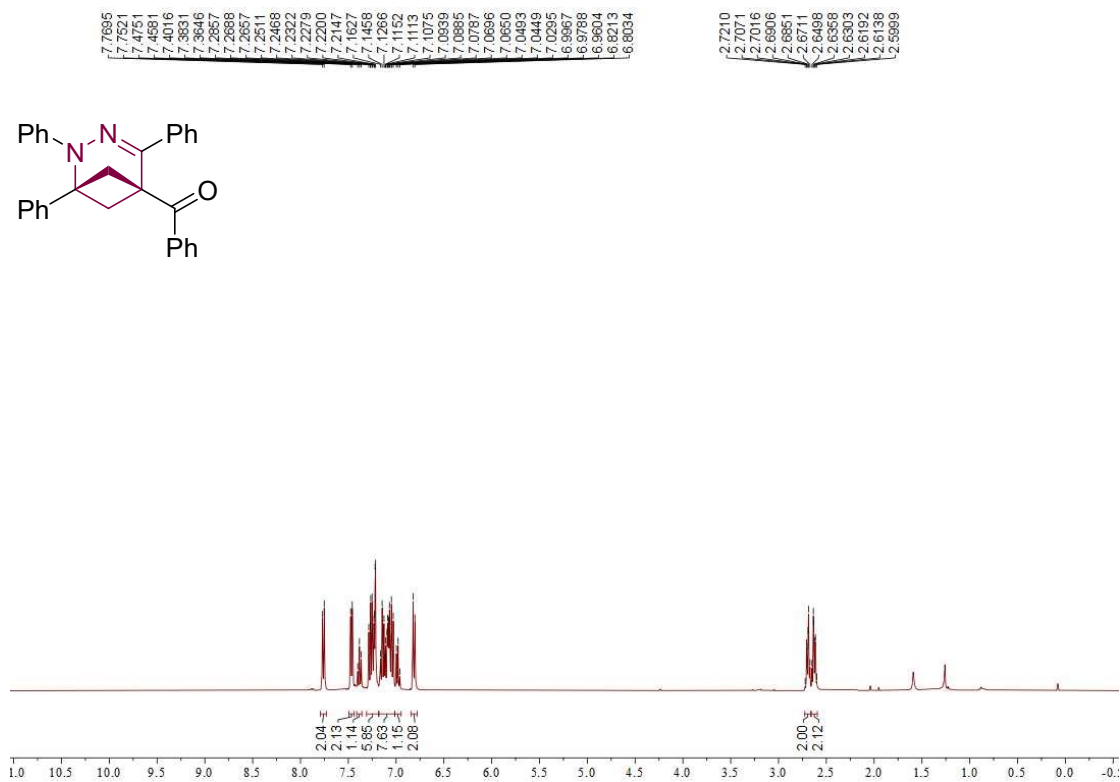

### $^{13}\text{C}$ NMR (101 MHz, $\text{CDCl}_3$ ) of **3a**

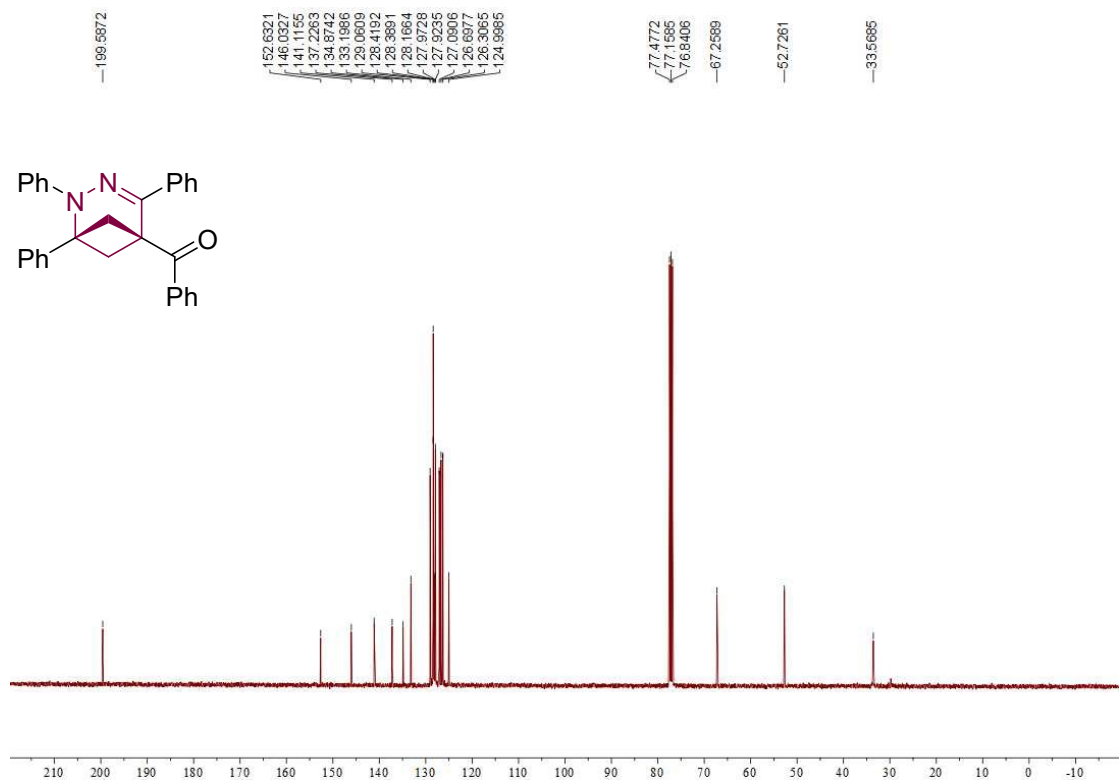

$^1\text{H}$  NMR (400 MHz,  $\text{CDCl}_3$ ) of **3b**

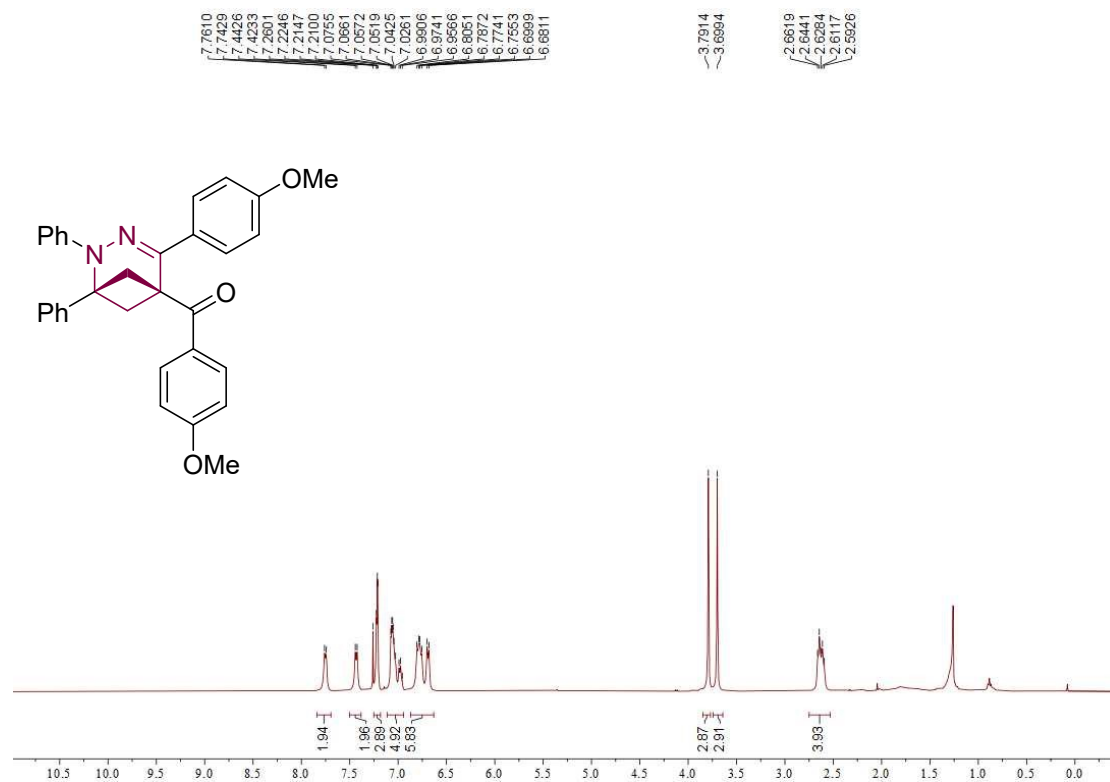

$^{13}\text{C}$  NMR (101 MHz,  $\text{CDCl}_3$ ) of **3b**

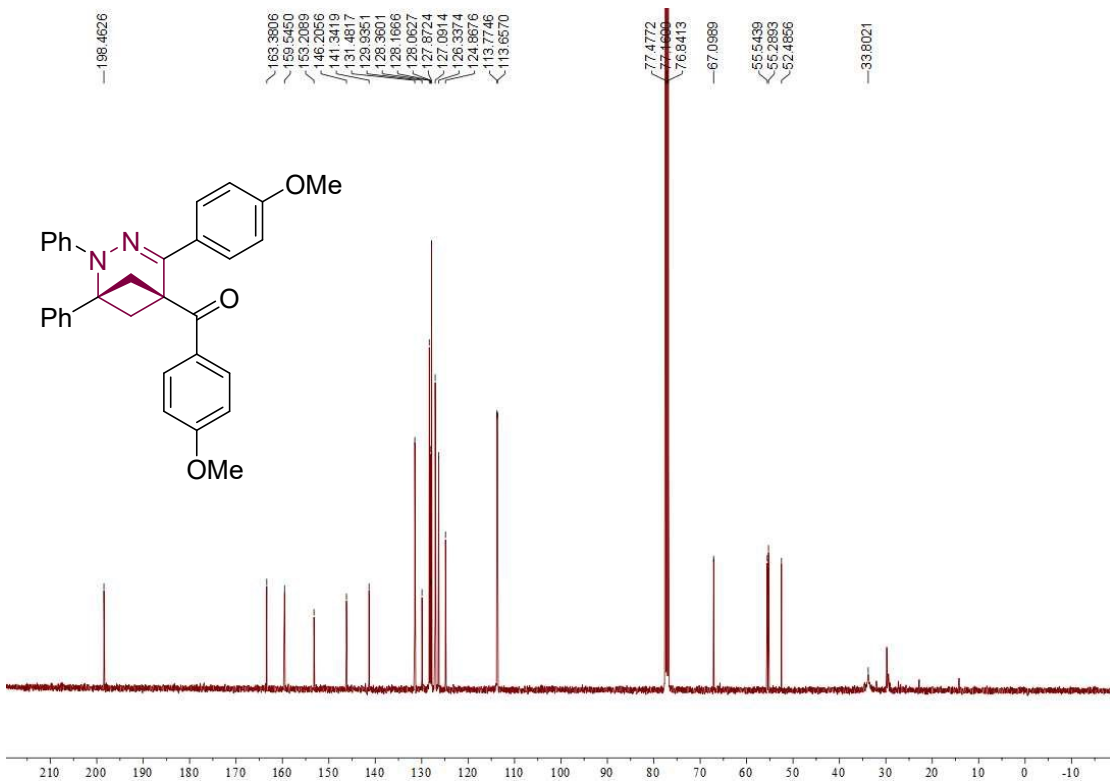

$^1\text{H}$  NMR (400 MHz,  $\text{CDCl}_3$ ) of **3c**

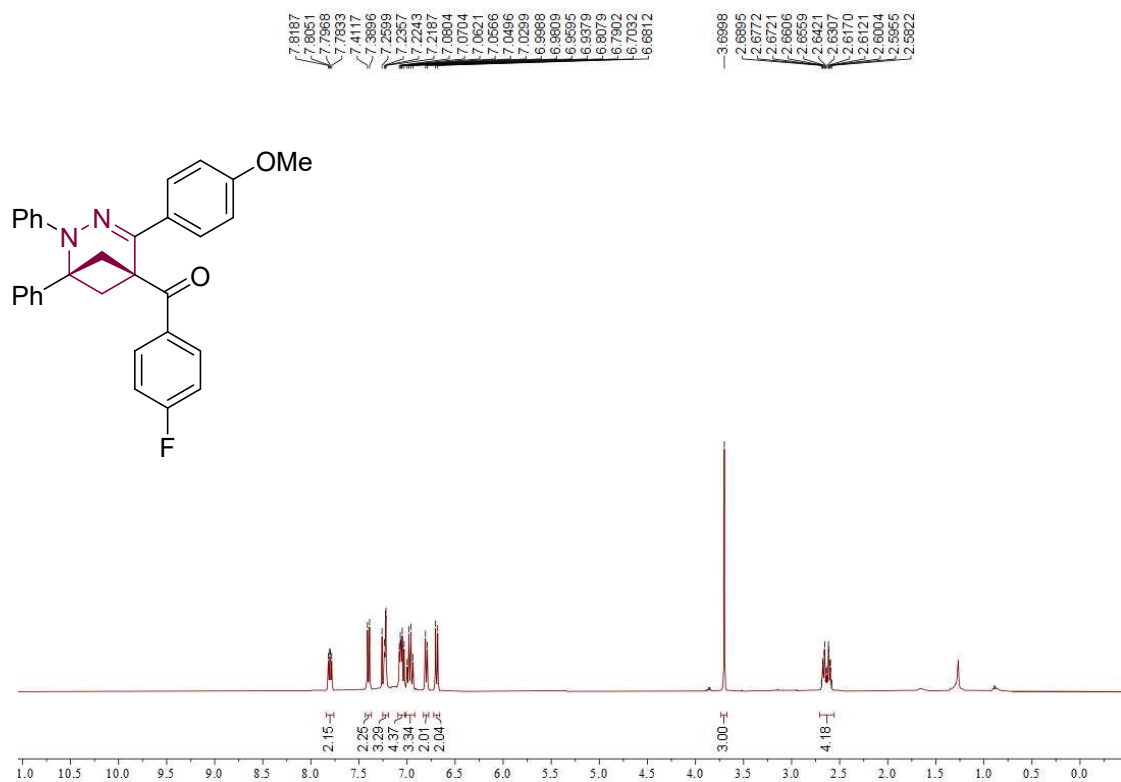

$^{13}\text{C}$  NMR (101 MHz,  $\text{CDCl}_3$ ) of **3c**

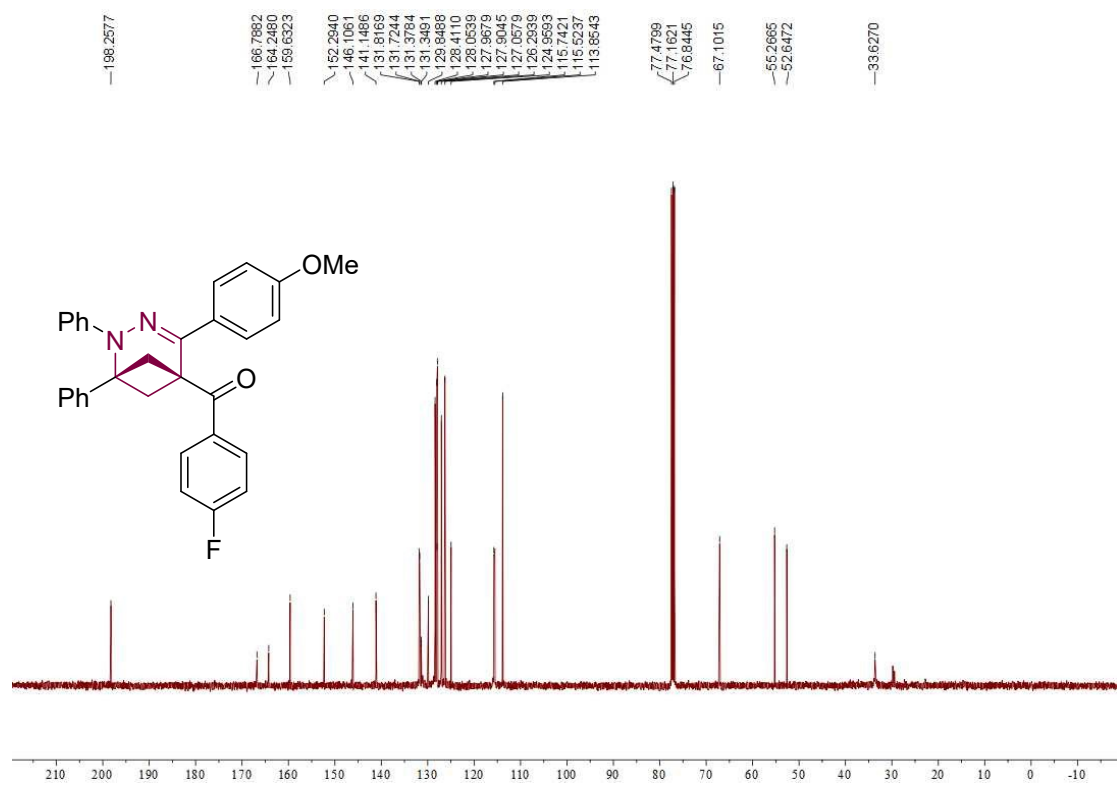

$^{19}\text{F}$  NMR (376 MHz,  $\text{CDCl}_3$ ) of **3c**

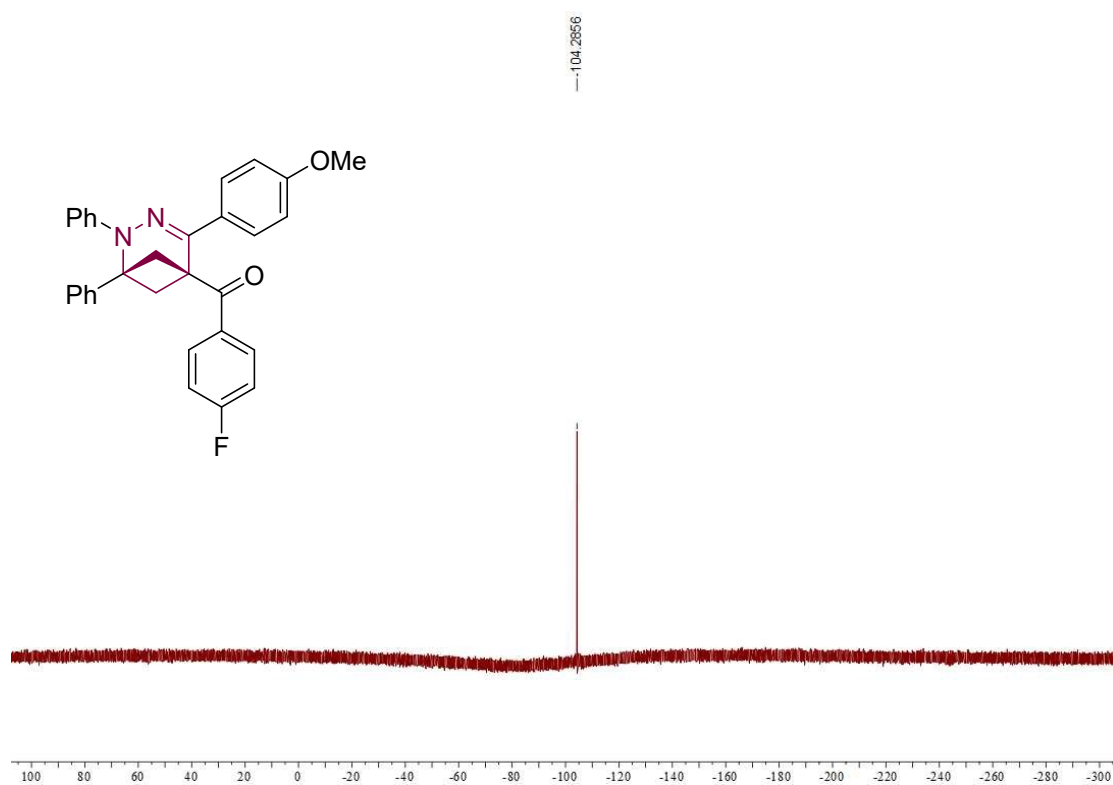

$^1\text{H}$  NMR (400 MHz,  $\text{CDCl}_3$ ) of **3d**

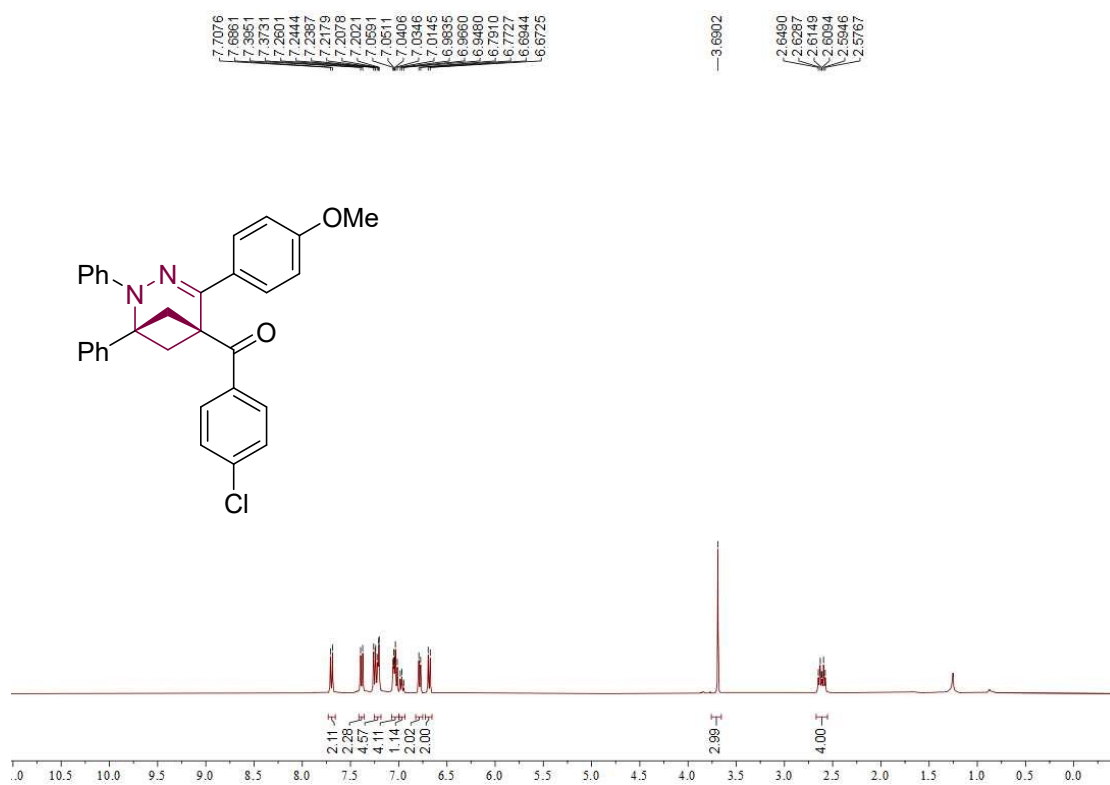

$^{13}\text{C}$  NMR (101 MHz,  $\text{CDCl}_3$ ) of **3d**

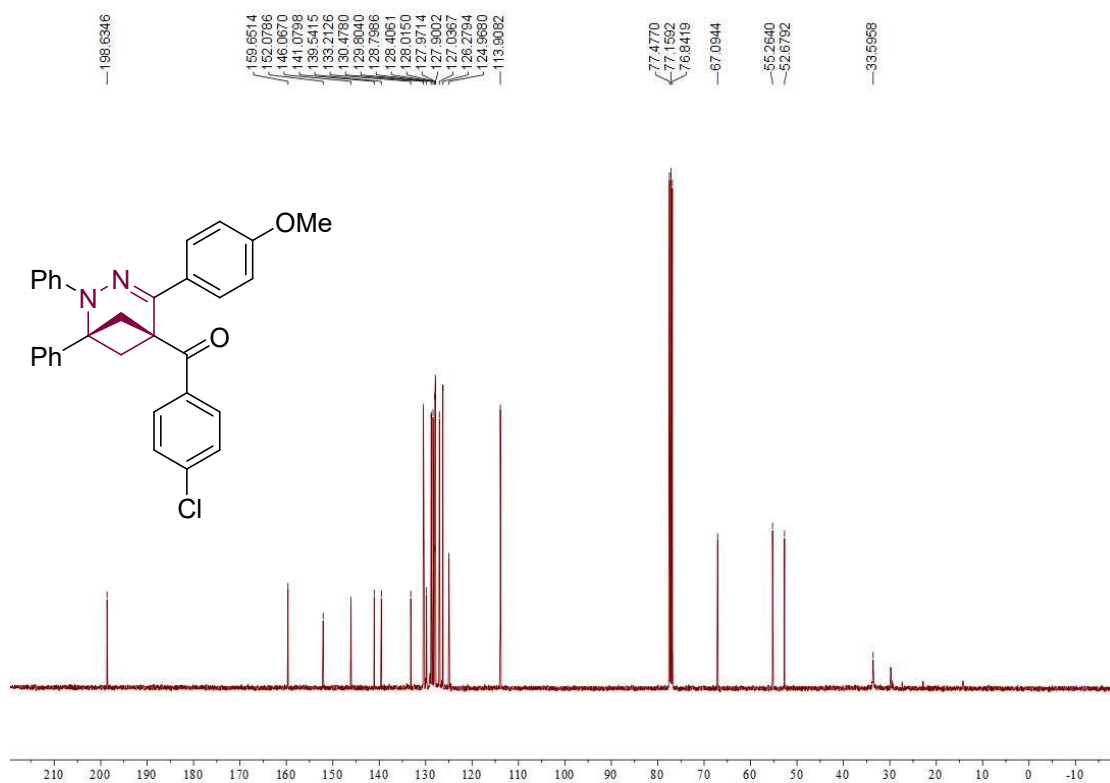



$^1\text{H}$  NMR (400 MHz,  $\text{CDCl}_3$ ) of **3e**

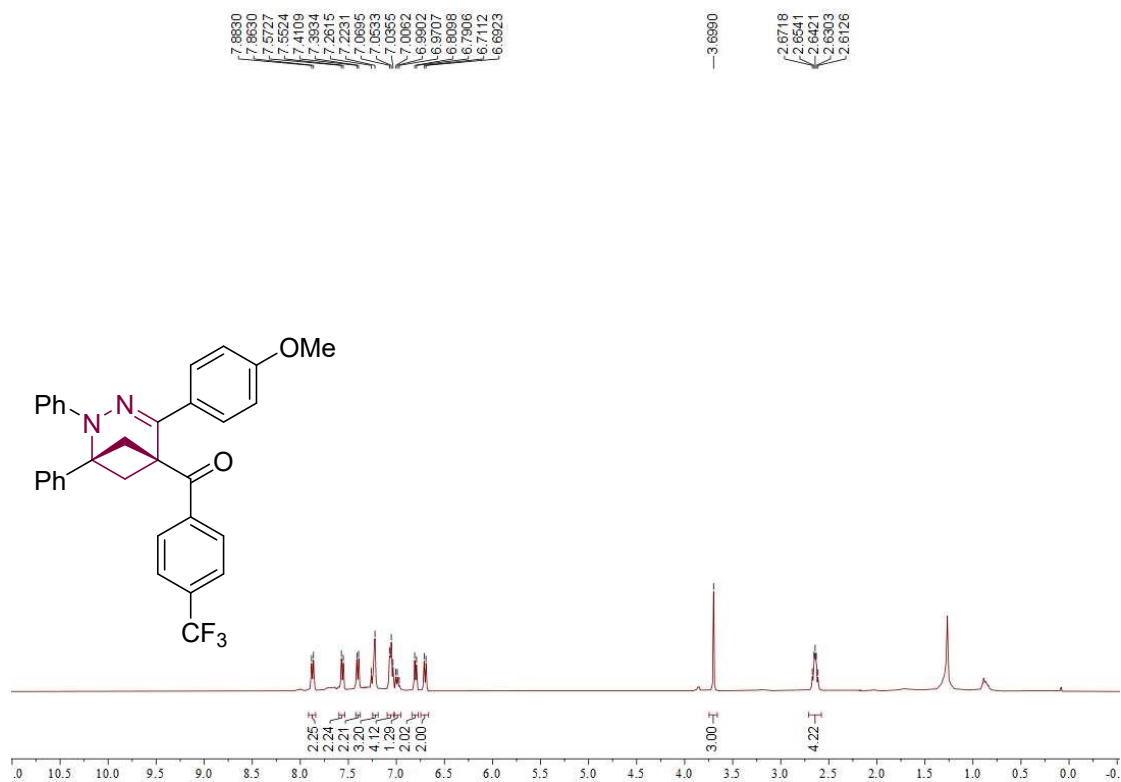

$^{13}\text{C}$  NMR (101 MHz,  $\text{CDCl}_3$ ) of **3e**

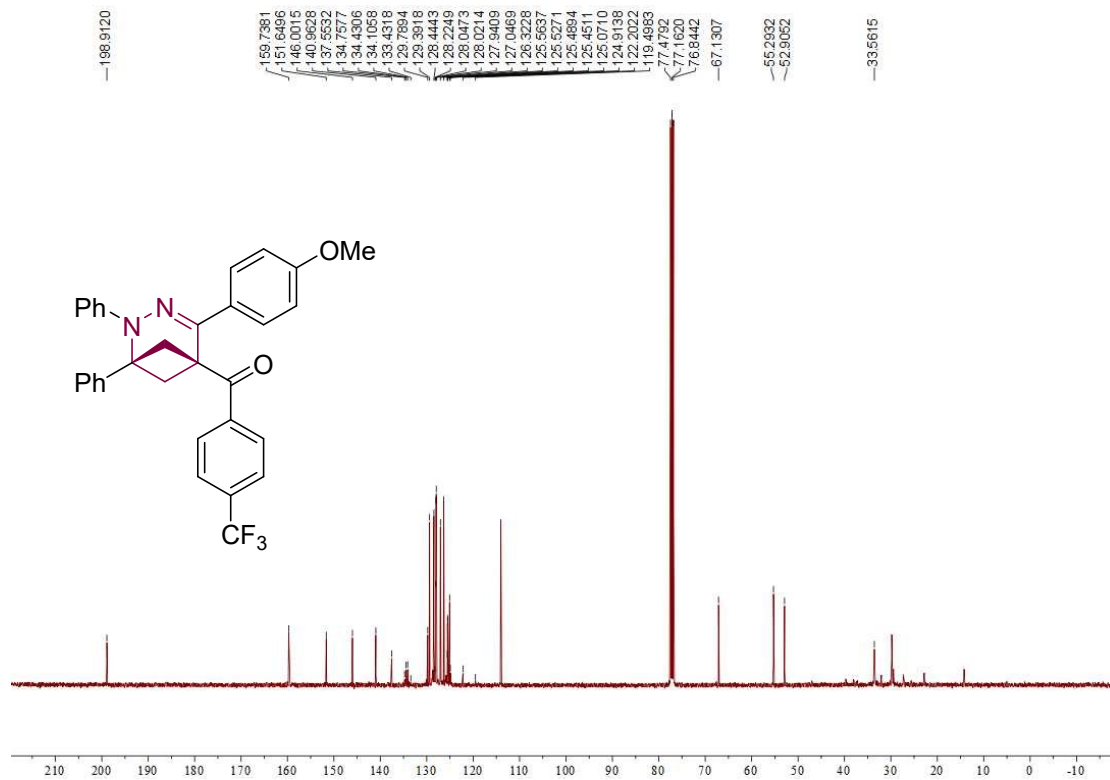

$^{19}\text{F}$  NMR (376 MHz,  $\text{CDCl}_3$ ) of **3e**

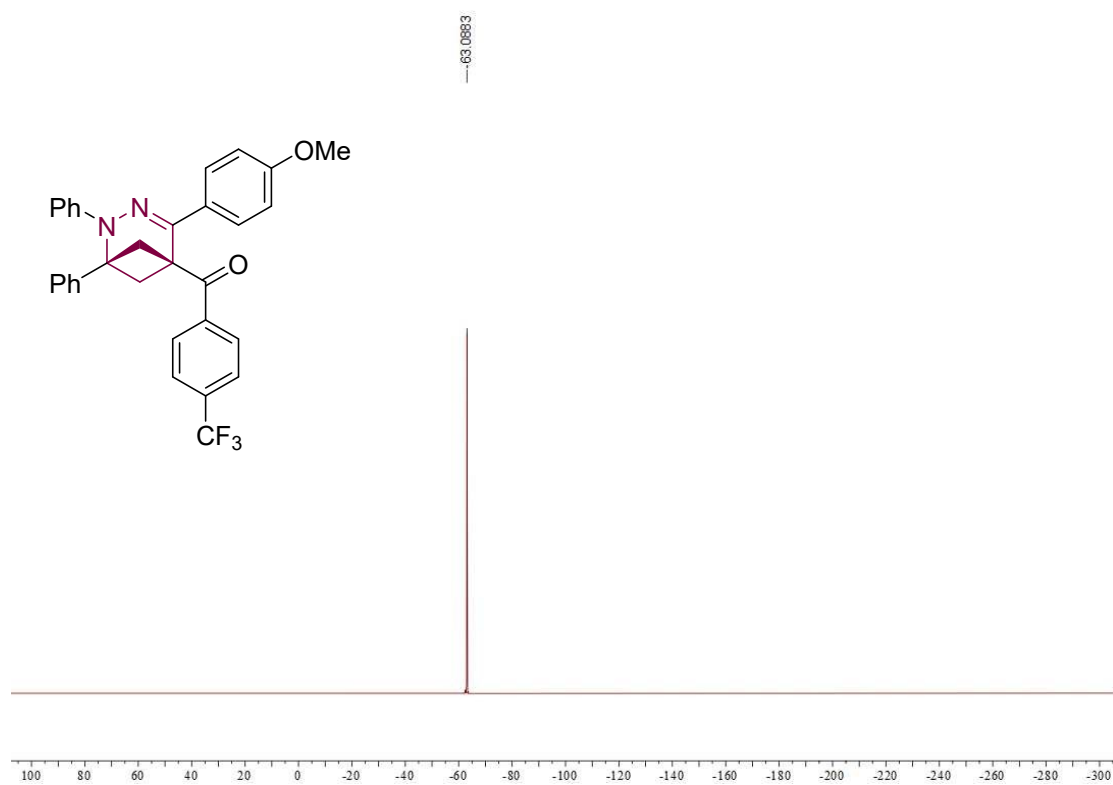

$^1\text{H}$  NMR (400 MHz,  $\text{CDCl}_3$ ) of **3f**

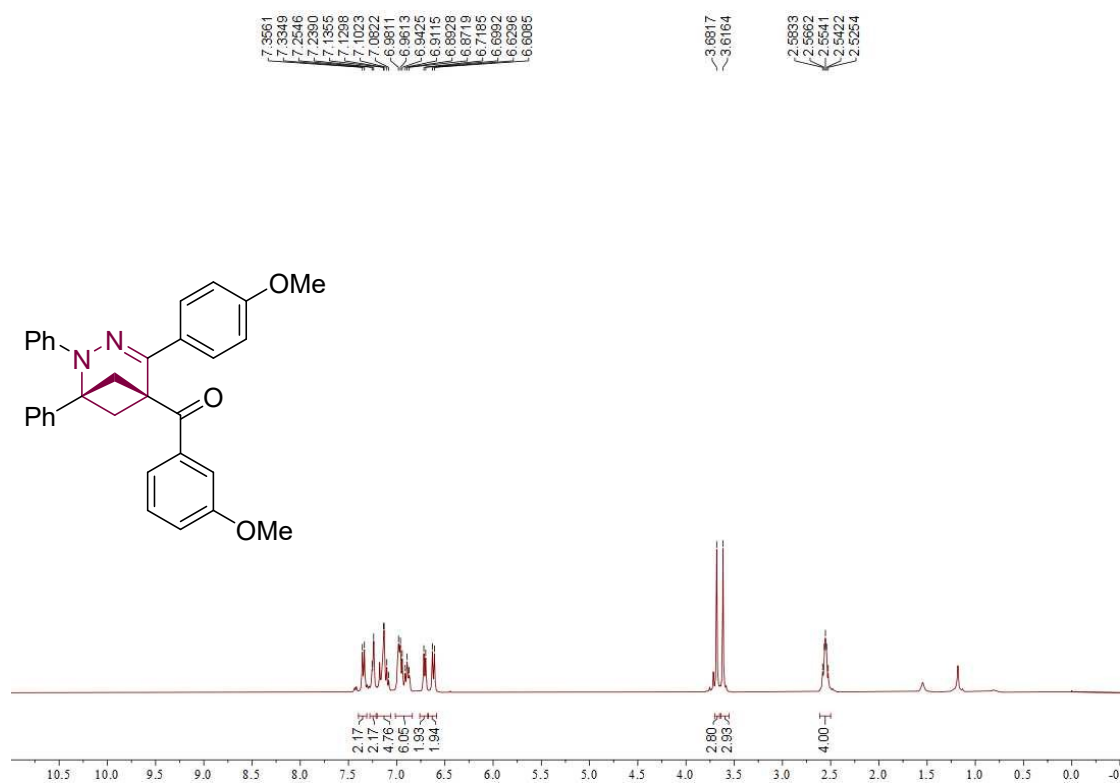

$^{13}\text{C}$  NMR (101 MHz,  $\text{CDCl}_3$ ) of **3f**

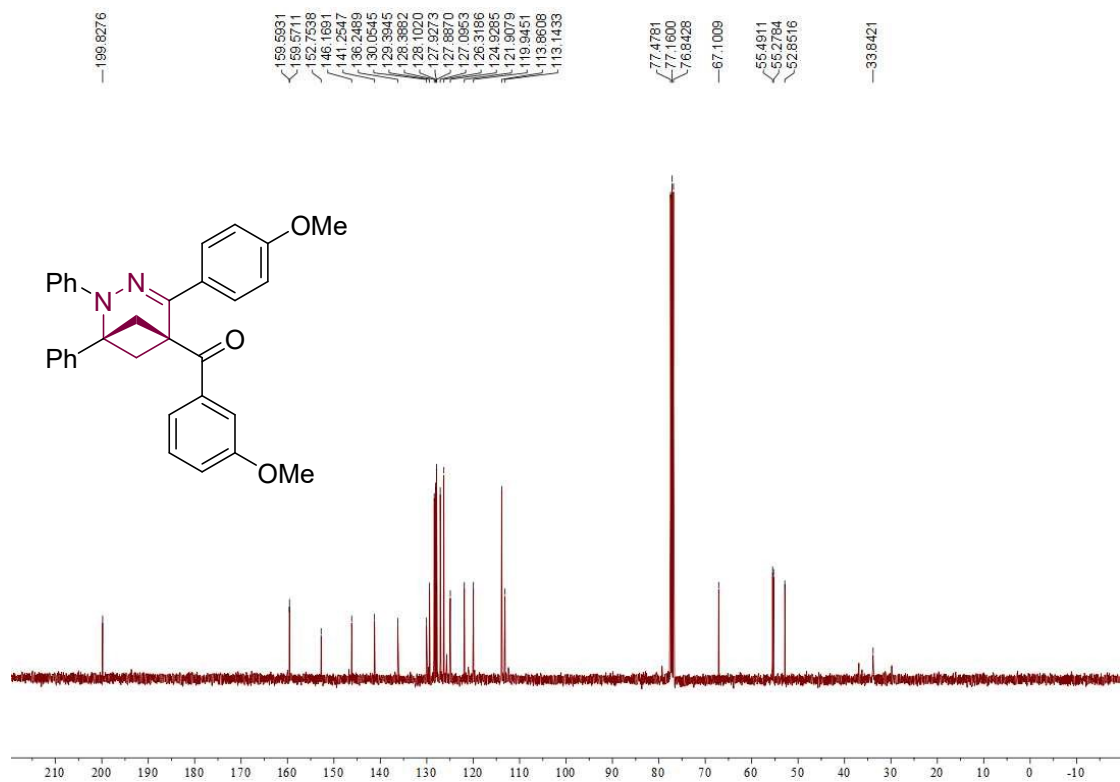

$^1\text{H}$  NMR (400 MHz,  $\text{CDCl}_3$ ) of **3g**

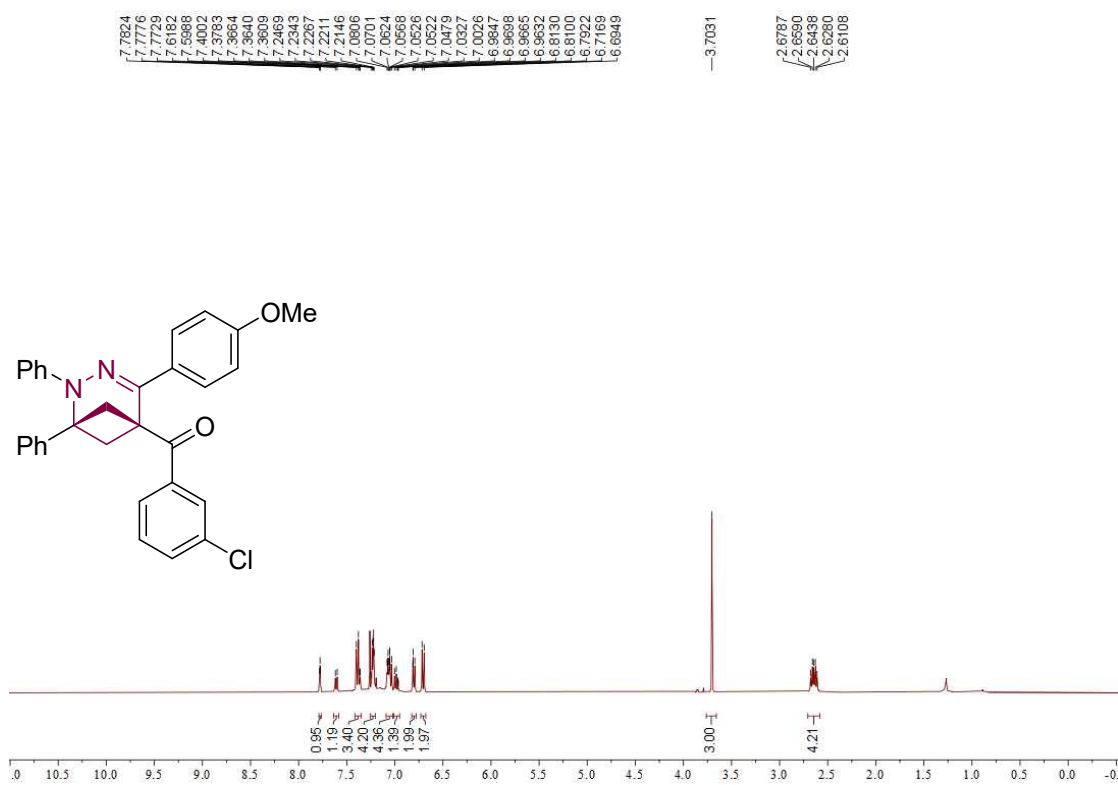

$^{13}\text{C}$  NMR (101 MHz,  $\text{CDCl}_3$ ) of **3g**

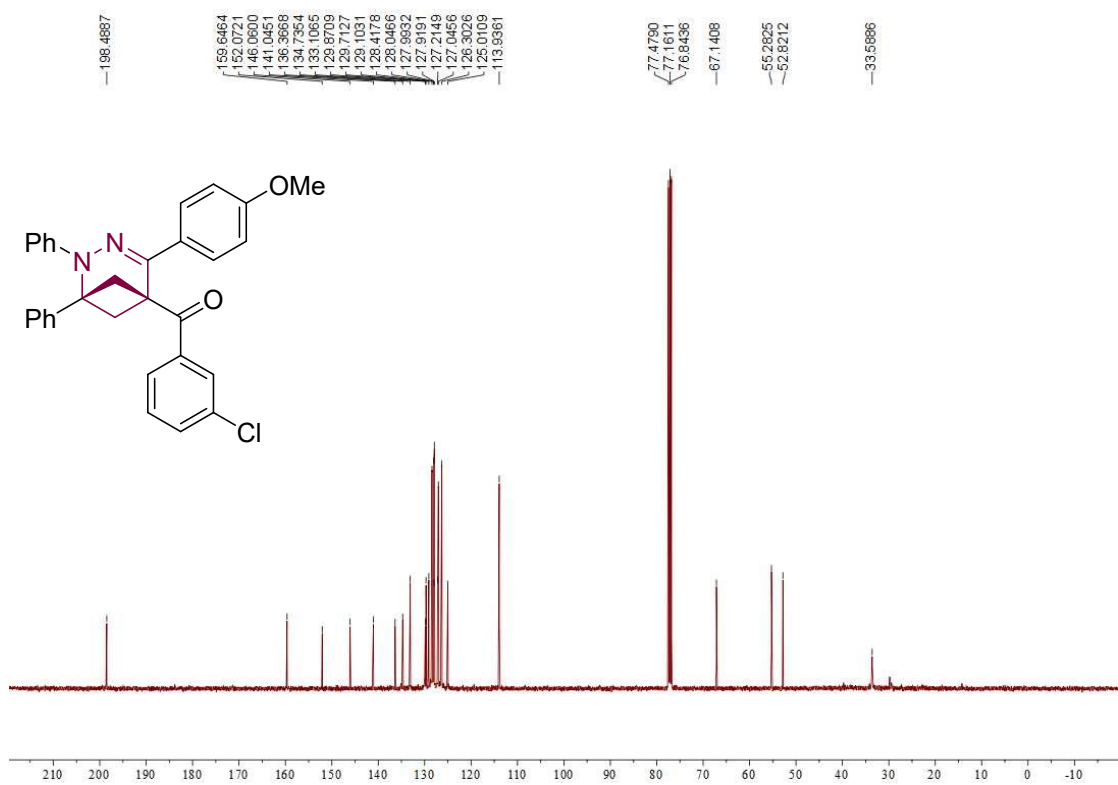

$^1\text{H}$  NMR (400 MHz,  $\text{CDCl}_3$ ) of **3h**

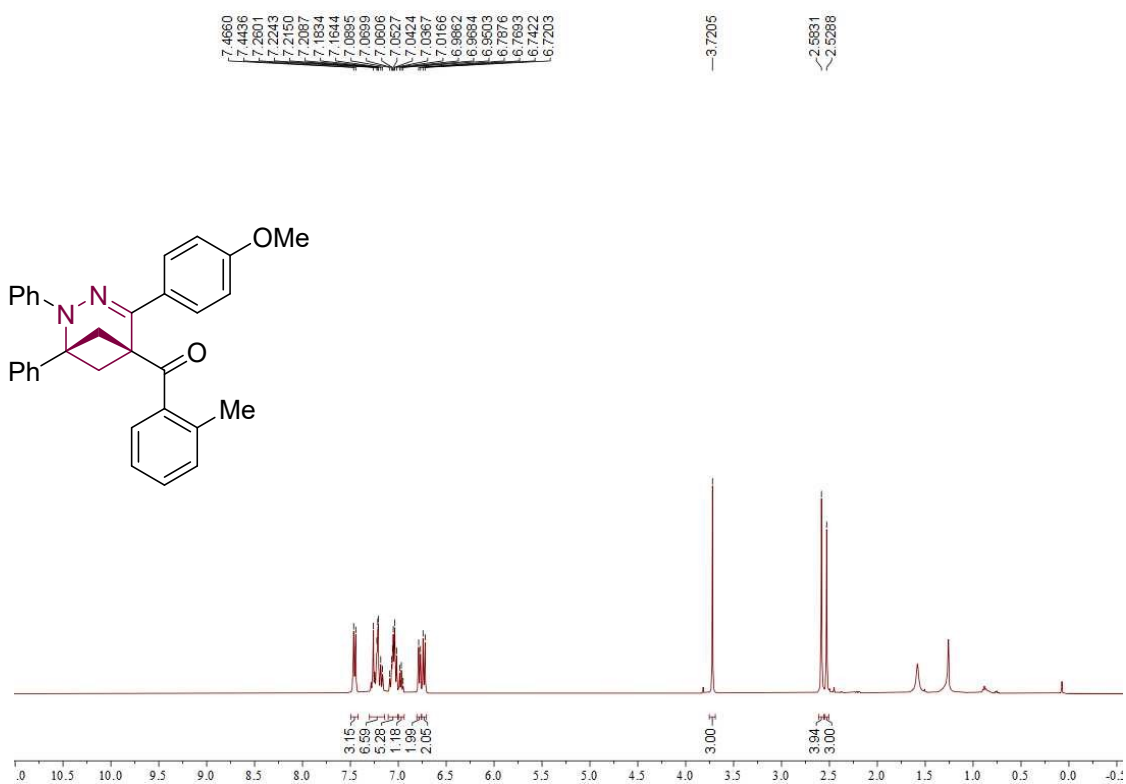

$^{13}\text{C}$  NMR (101 MHz,  $\text{CDCl}_3$ ) of **3h**

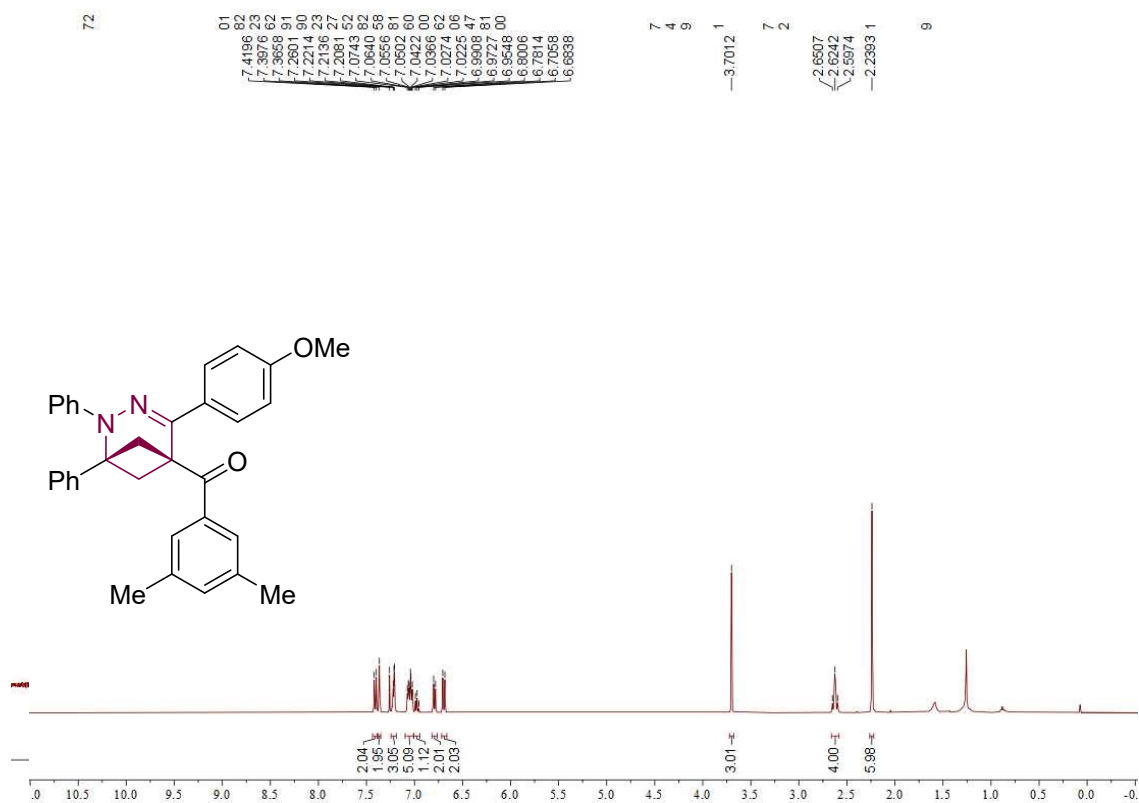

$^1\text{H}$  NMR (400 MHz,  $\text{CDCl}_3$ ) of **3i**

$^{13}\text{C}$  NMR (101 MHz,  $\text{CDCl}_3$ ) of **3i**

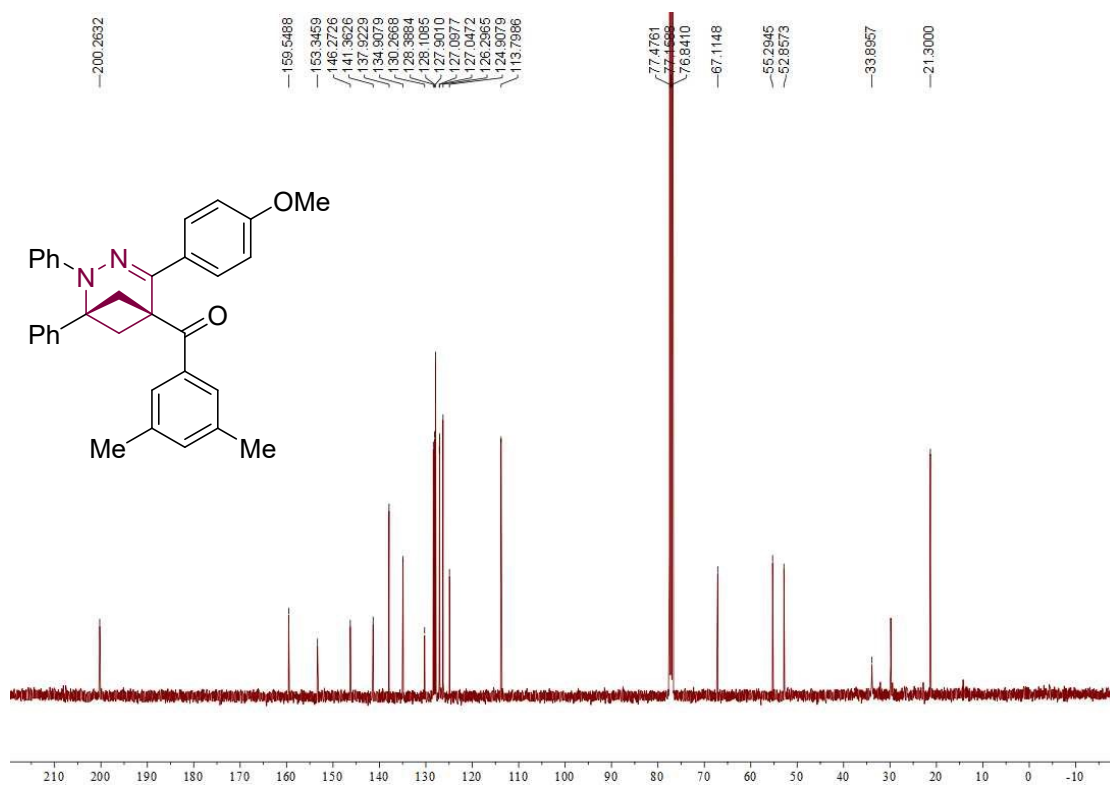

$^1\text{H}$  NMR (400 MHz,  $\text{CDCl}_3$ ) of **3j**

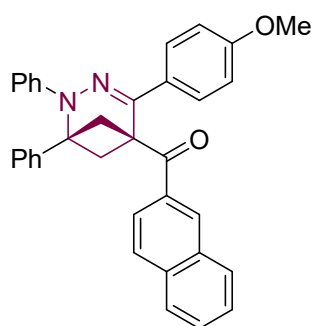

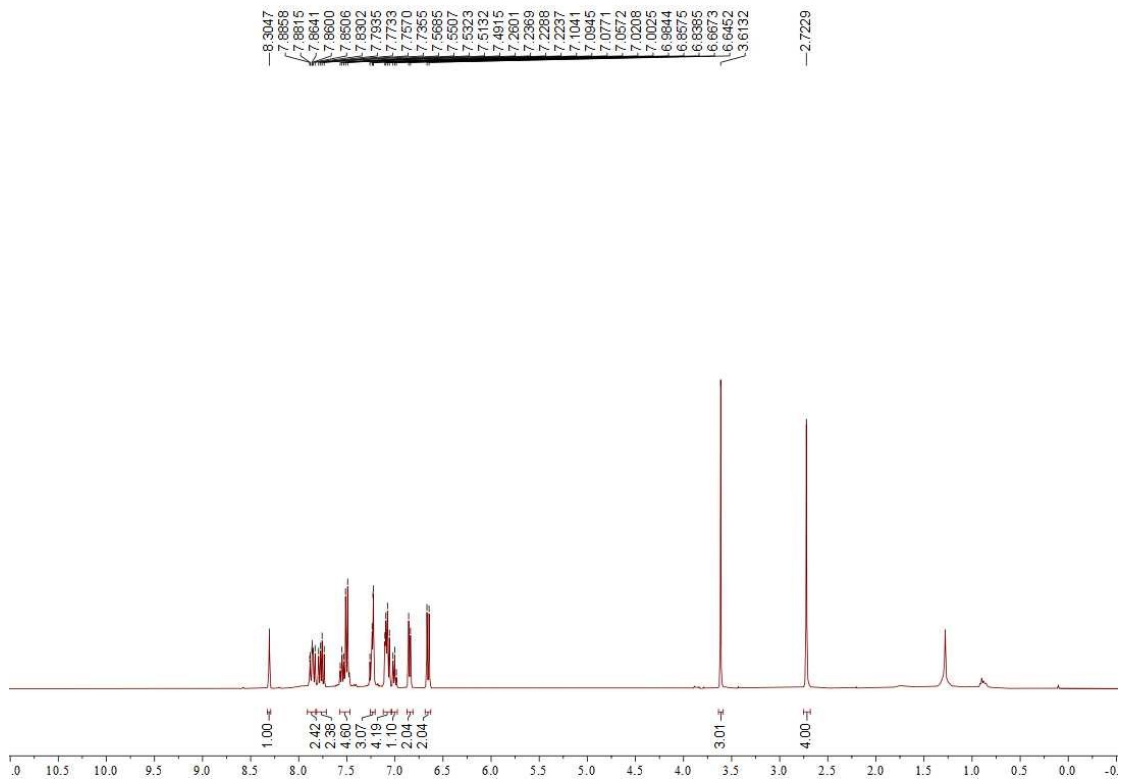

$^{13}\text{C}$  NMR (101 MHz,  $\text{CDCl}_3$ ) of **3j**

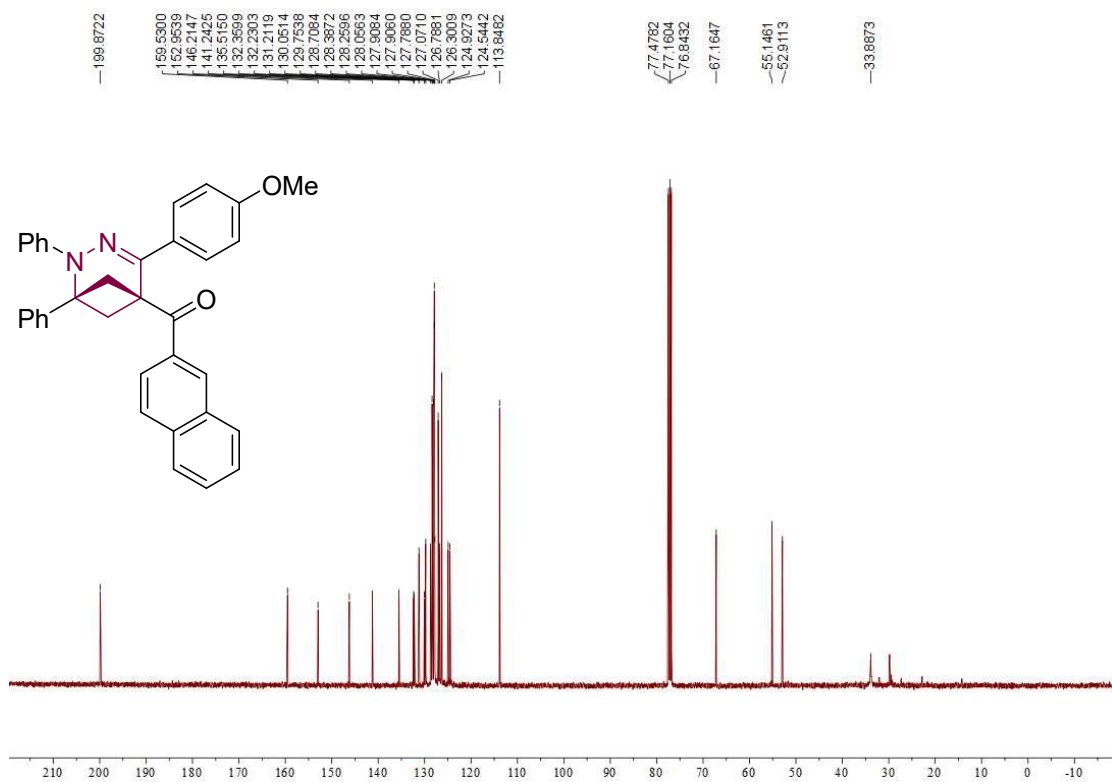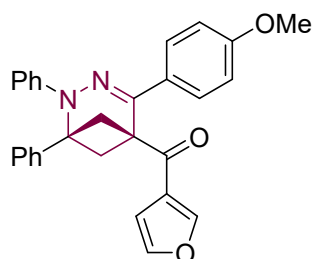

$^1\text{H}$  NMR (400 MHz,  $\text{CDCl}_3$ ) of **3k**

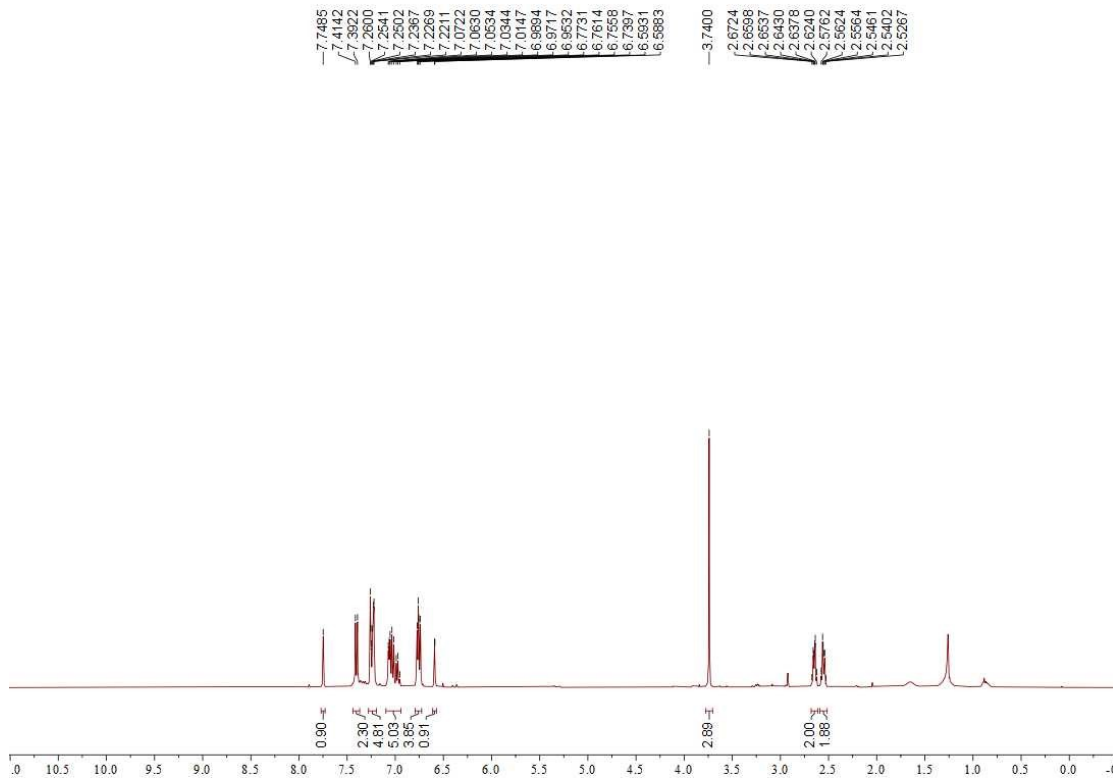

$^{13}\text{C}$  NMR (101 MHz,  $\text{CDCl}_3$ ) of **3k**

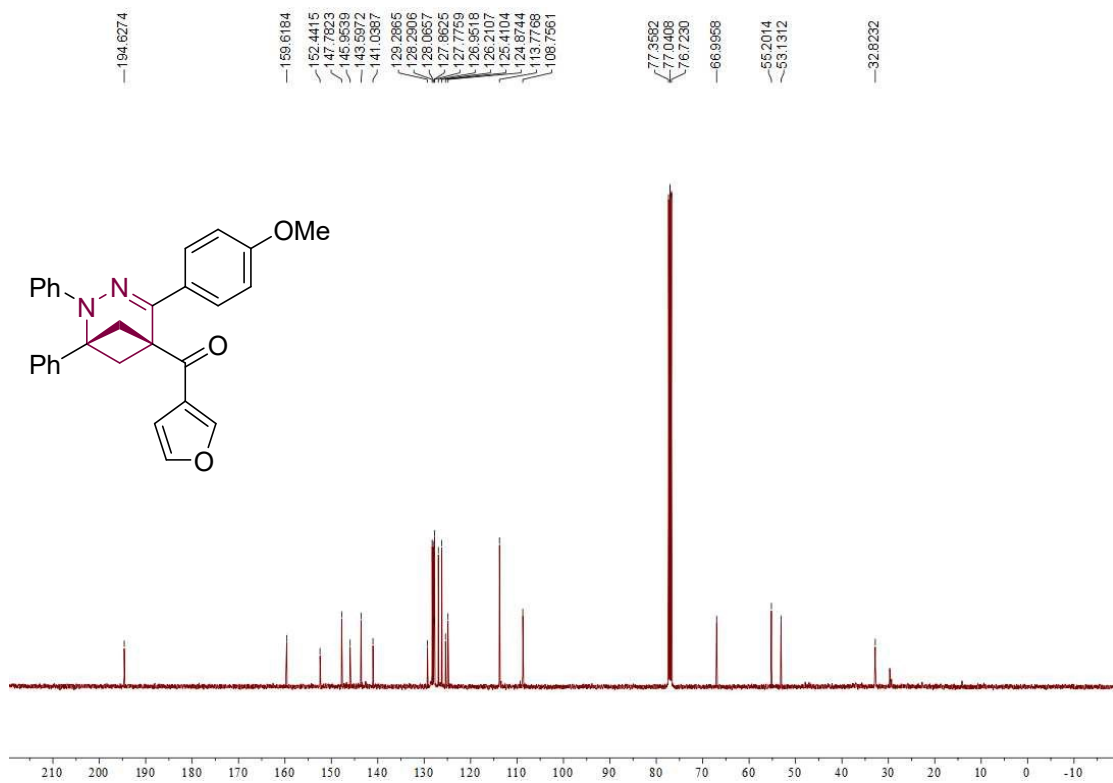

$^1\text{H}$  NMR (400 MHz,  $\text{CDCl}_3$ ) of **3l**

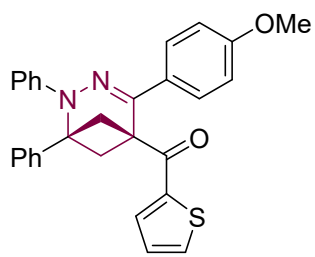



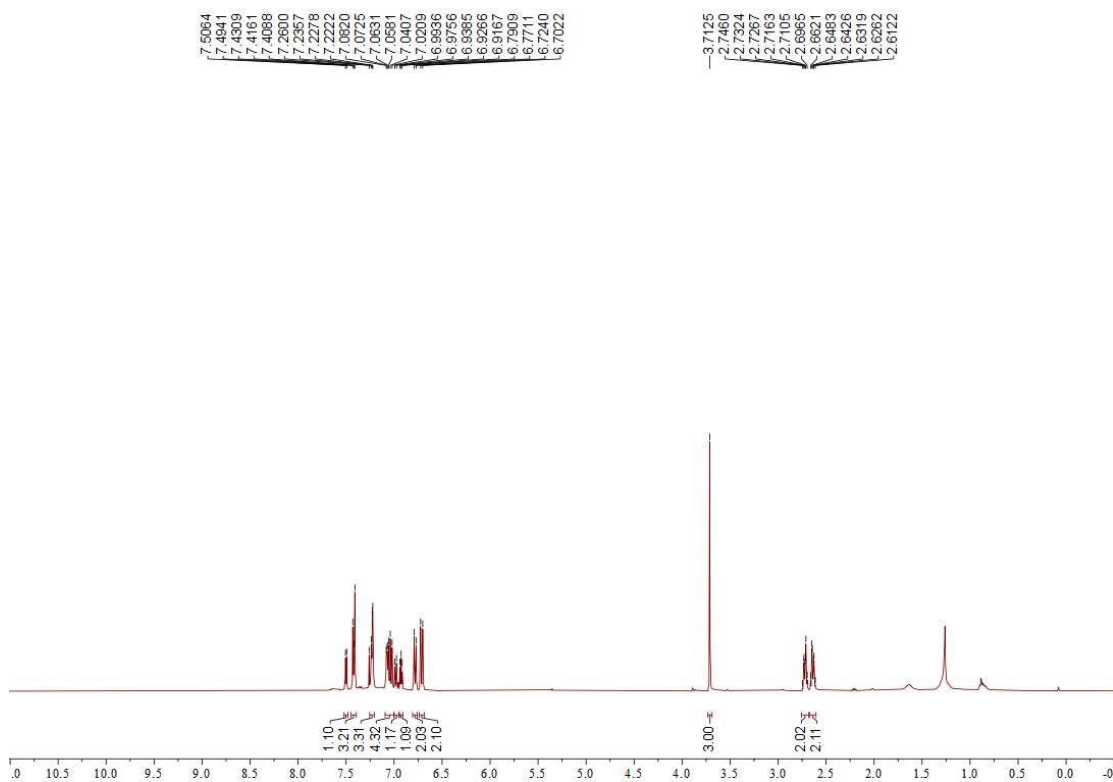

$^{13}\text{C}$  NMR (101 MHz,  $\text{CDCl}_3$ ) of **31**

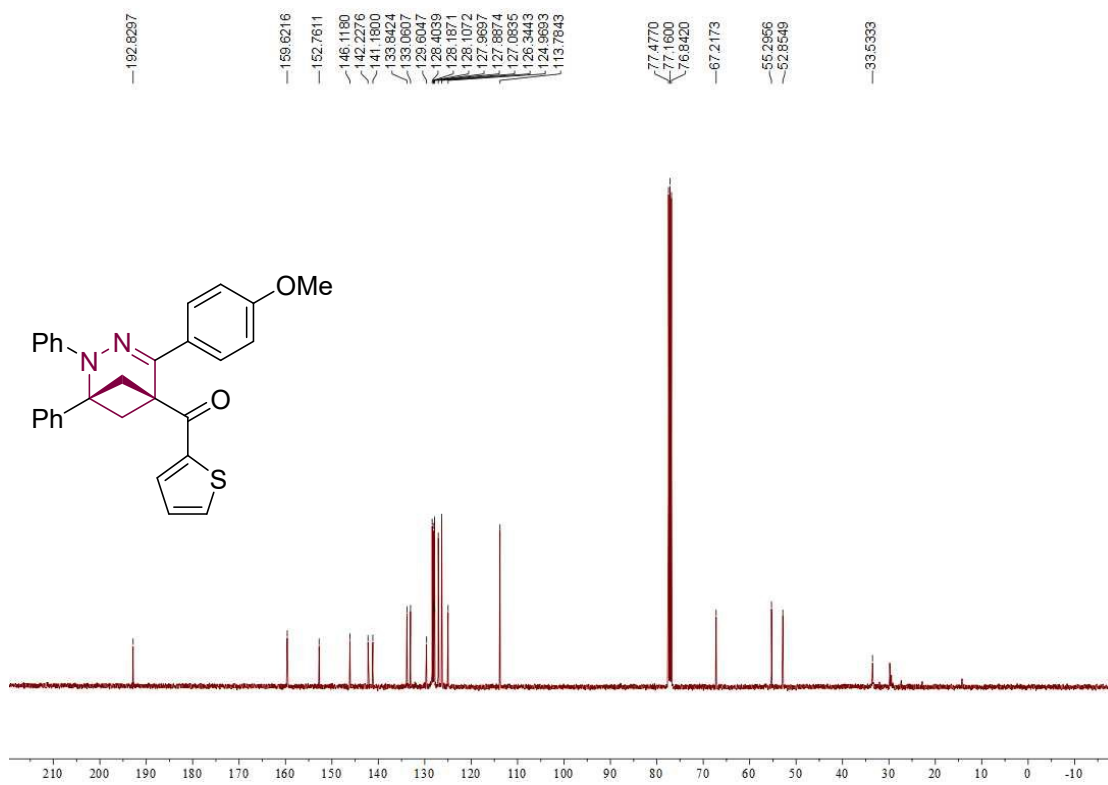

$^{13}\text{C}$  NMR (101 MHz,  $\text{CDCl}_3$ ) of **3m**

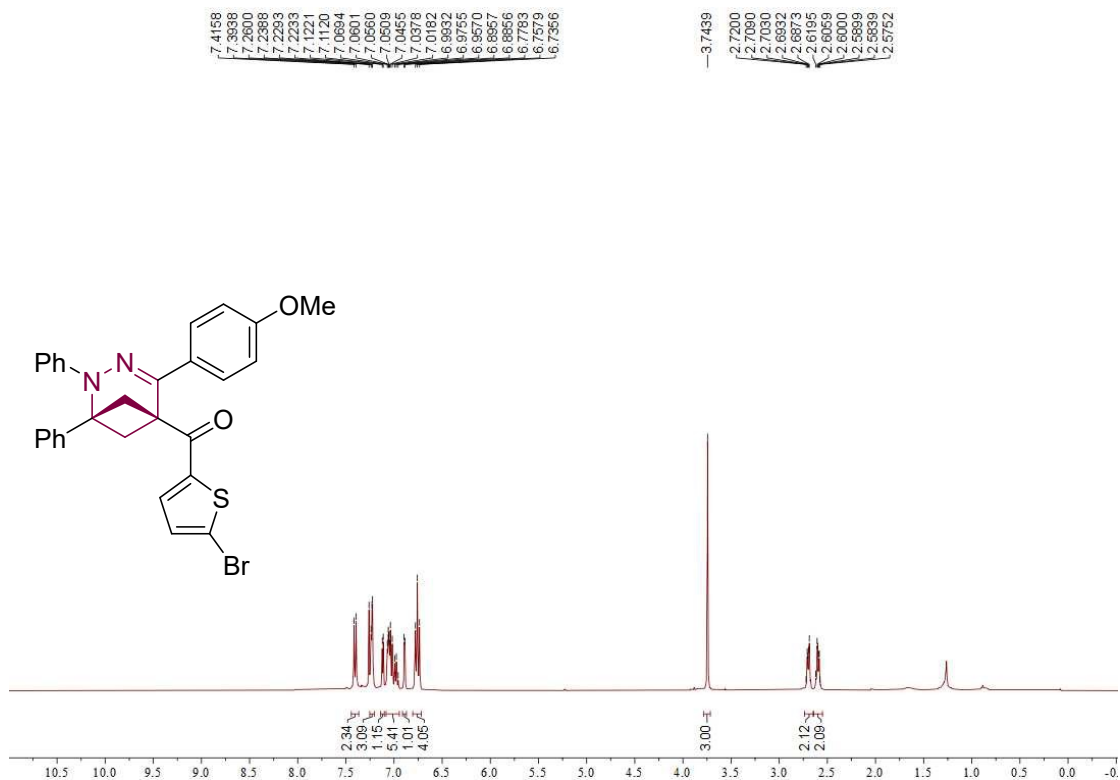

<sup>13</sup>C NMR (101 MHz, CDCl<sub>3</sub>) of **3m**

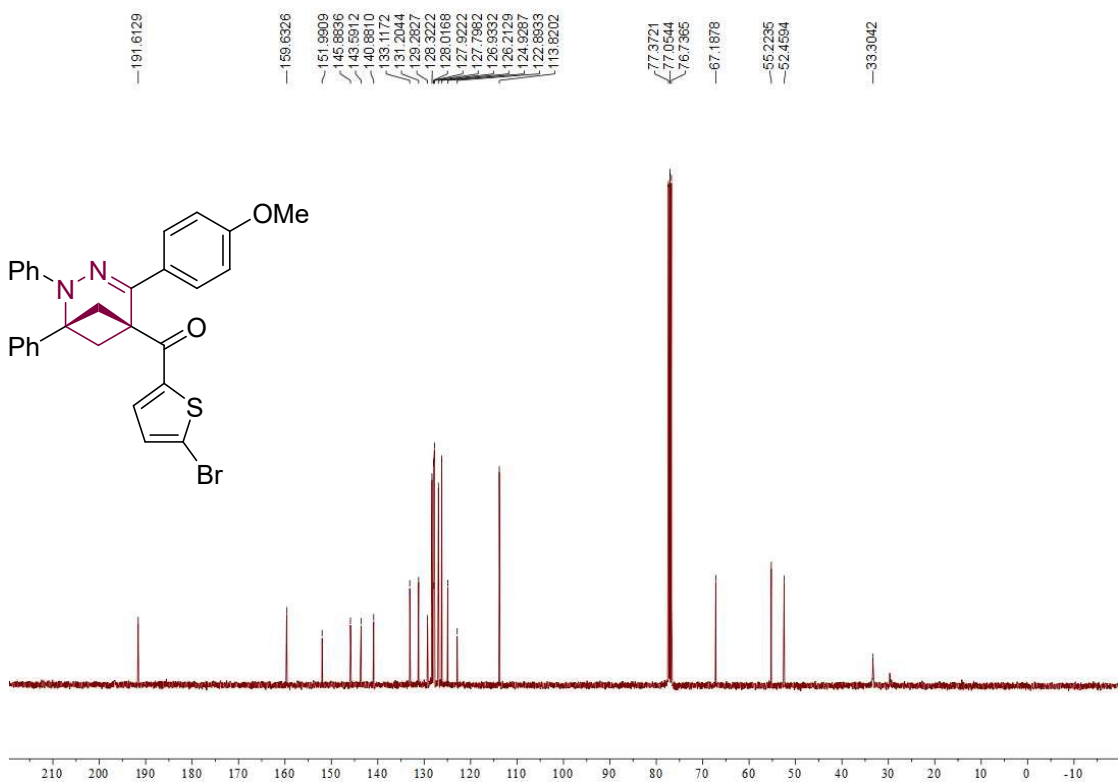

<sup>1</sup>H NMR (400 MHz, CDCl<sub>3</sub>) of **3n**

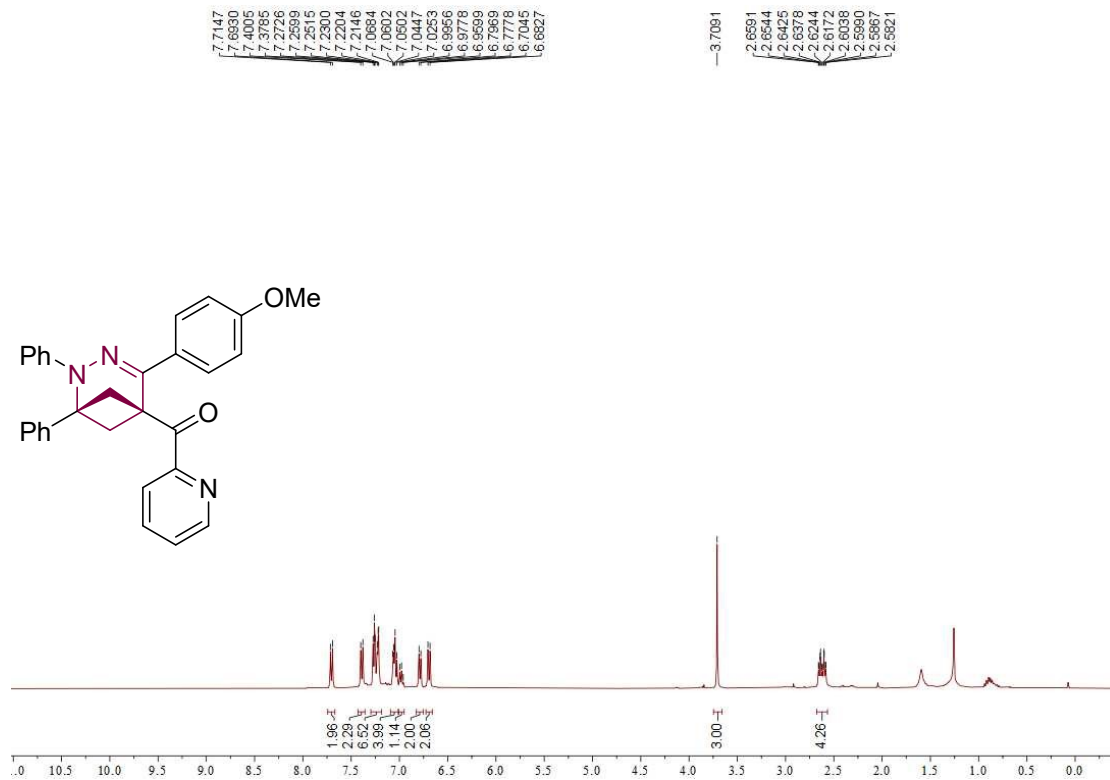

<sup>13</sup>C NMR (101 MHz, CDCl<sub>3</sub>) of **3n**

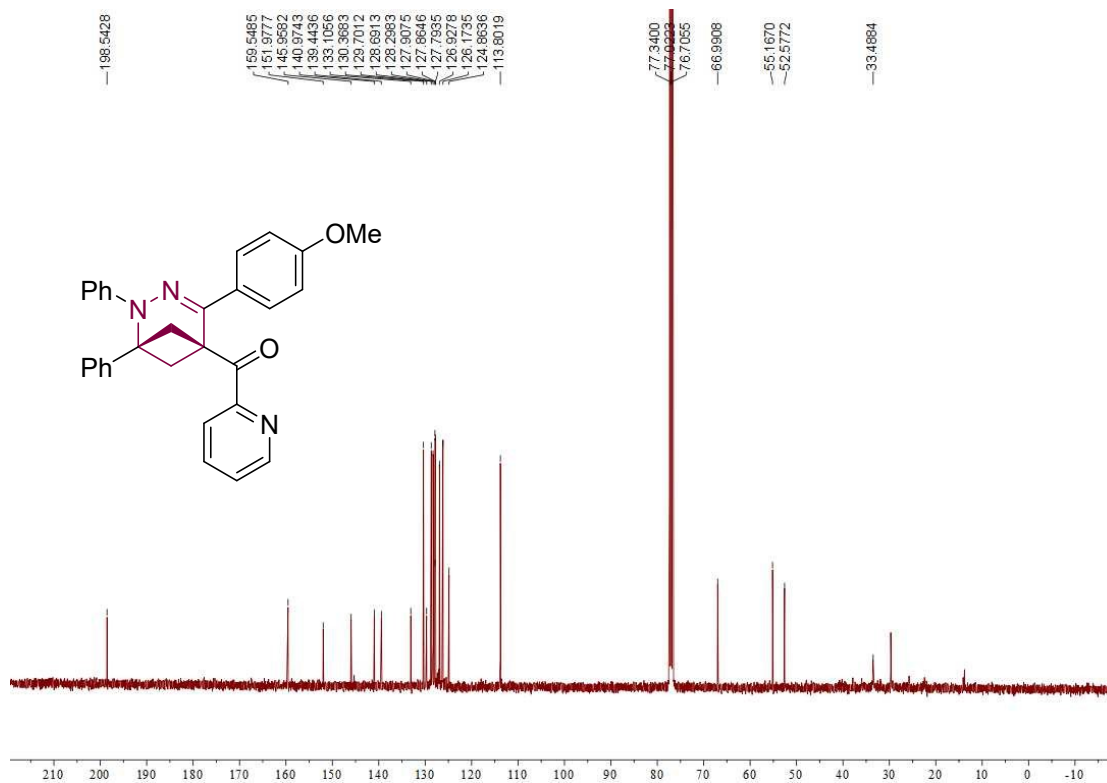

<sup>1</sup>H NMR (400 MHz, CDCl<sub>3</sub>) of **3o**

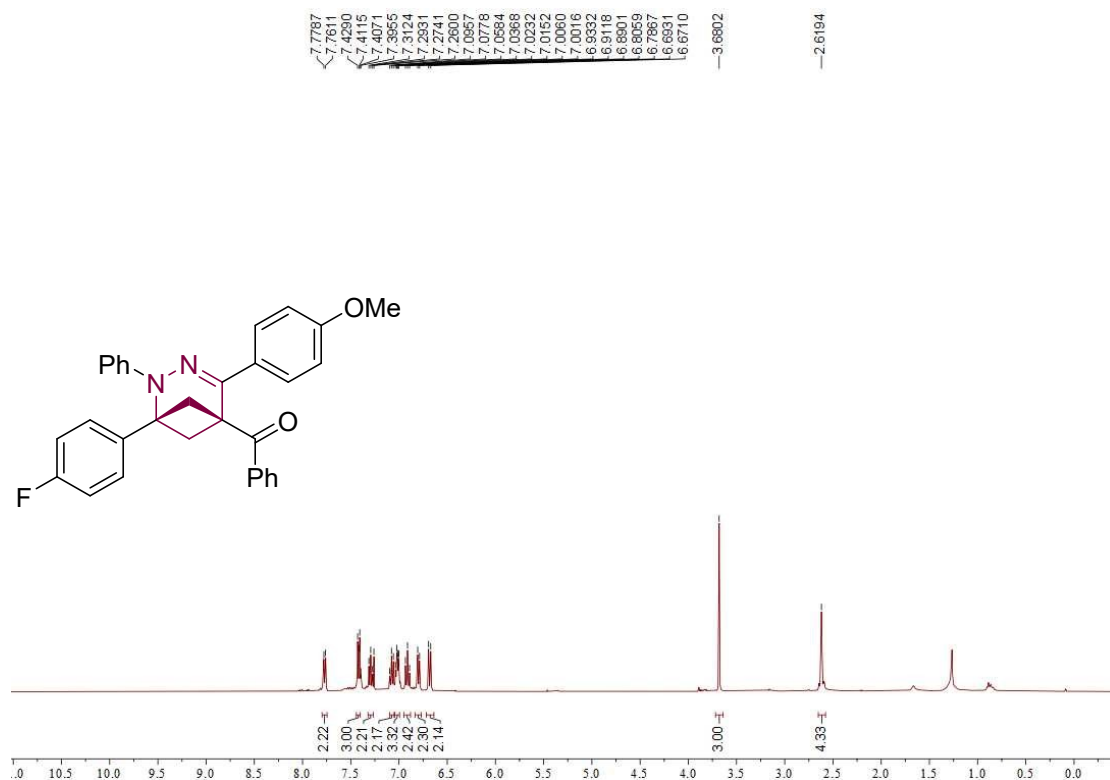

**<sup>13</sup>C NMR (101 MHz, CDCl<sub>3</sub>) of **30****

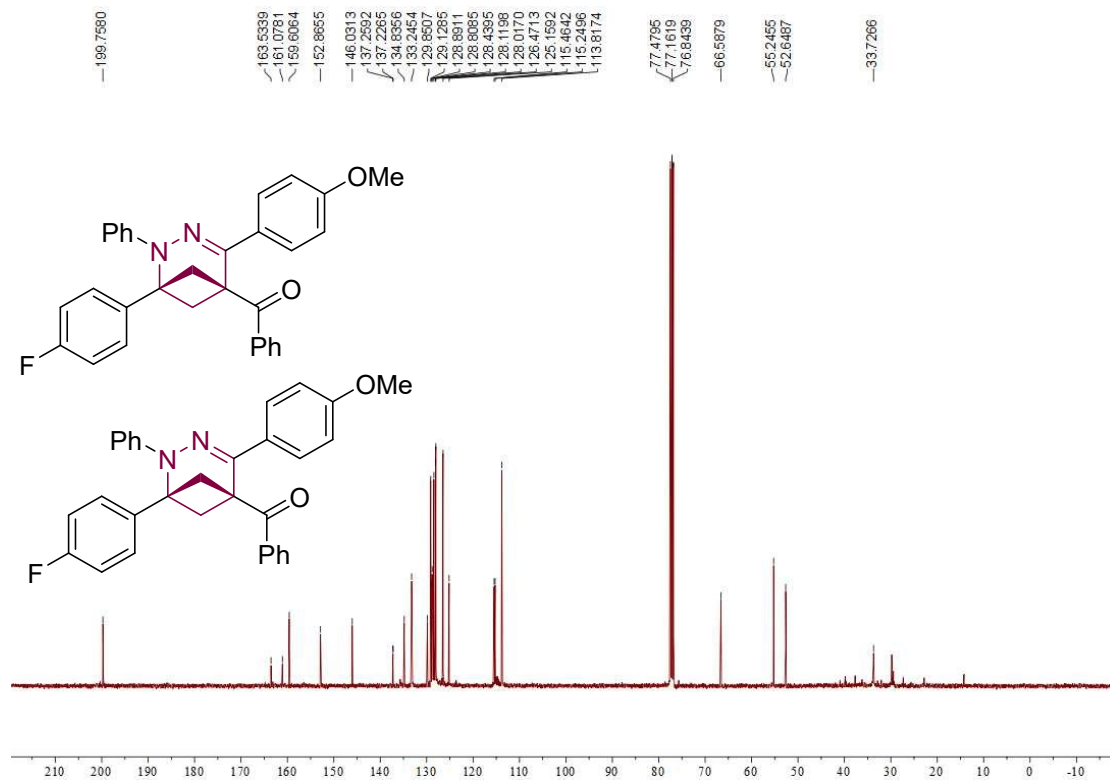

**<sup>19</sup>F NMR (376 MHz, CDCl<sub>3</sub>) of **30****

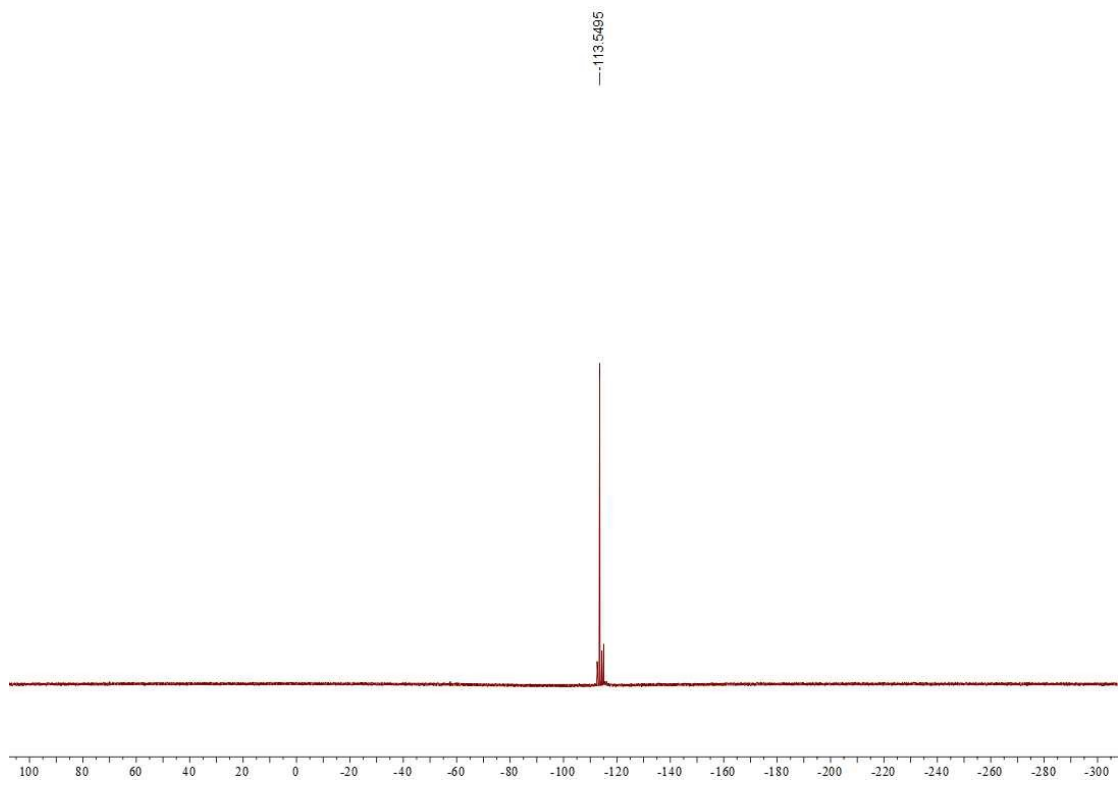

$^1\text{H}$  NMR (400 MHz,  $\text{CDCl}_3$ ) of **3p**

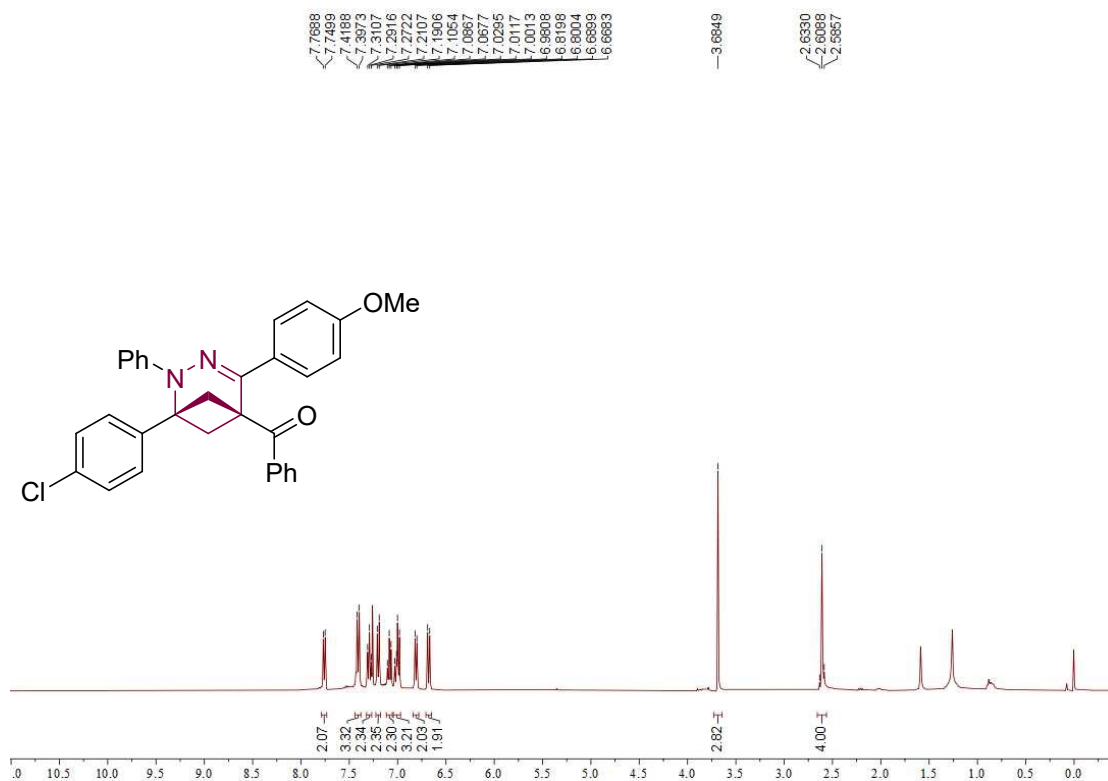

$^{13}\text{C}$  NMR (101 MHz,  $\text{CDCl}_3$ ) of **3p**

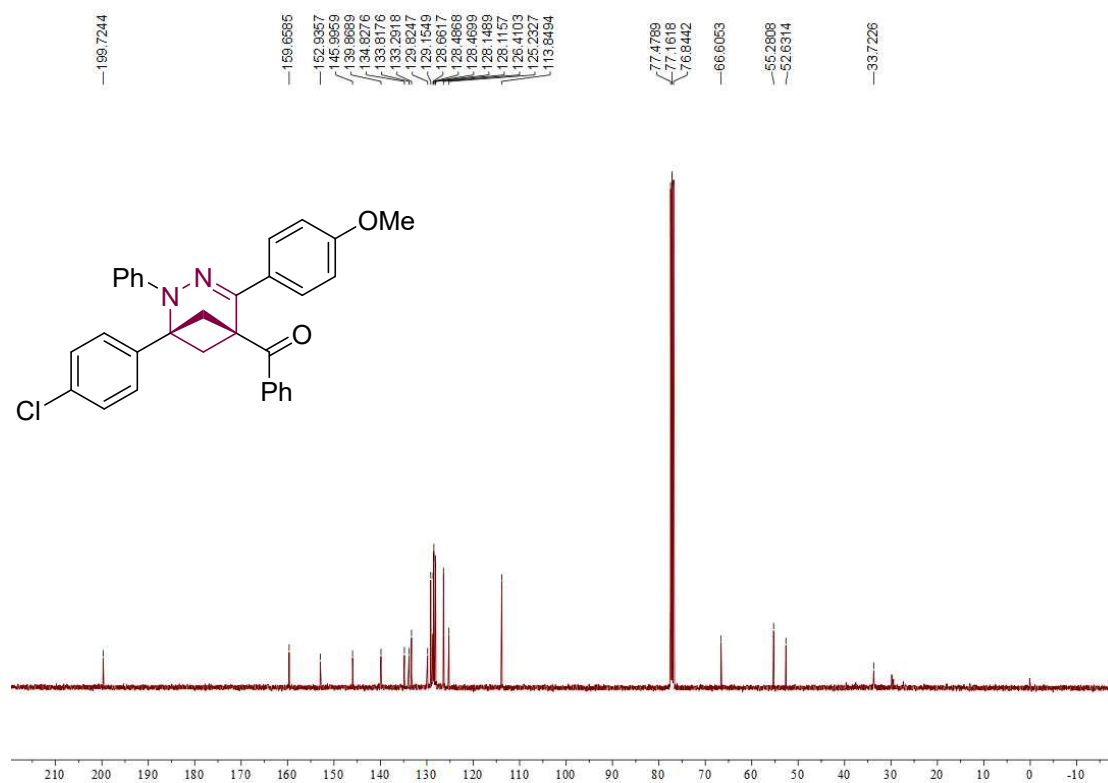

$^1\text{H}$  NMR (400 MHz,  $\text{CDCl}_3$ ) of **3q**

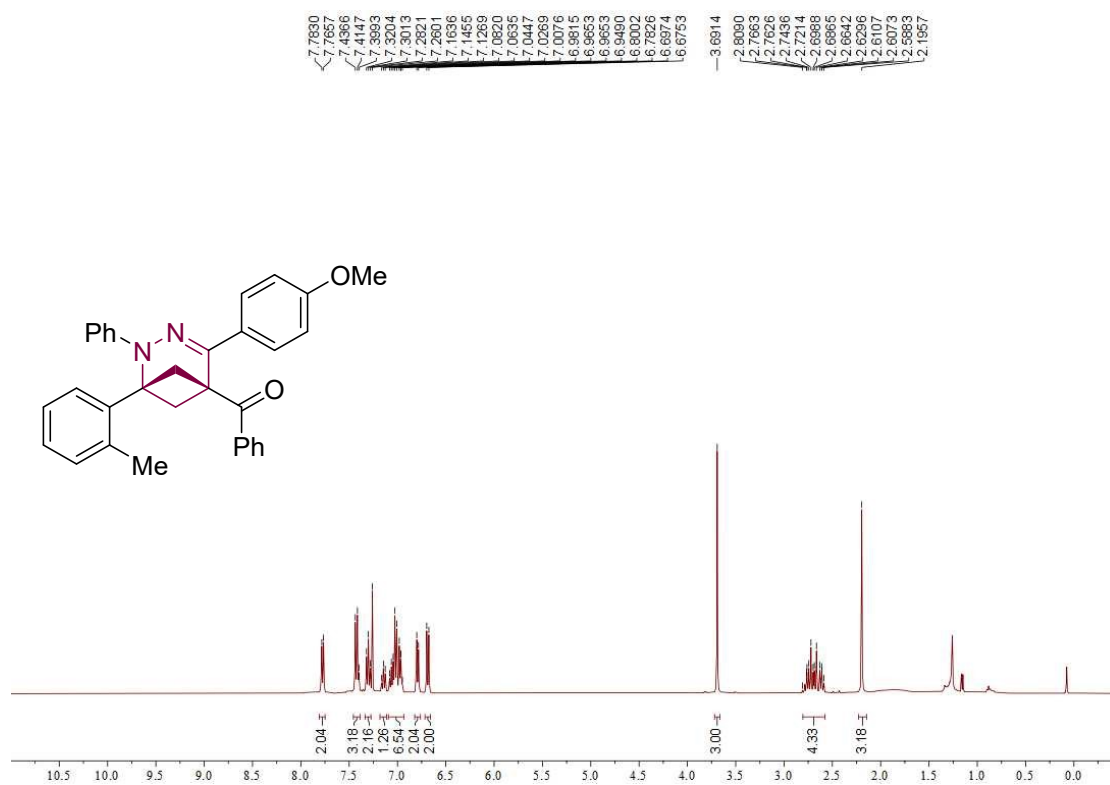

$^{13}\text{C}$  NMR (101 MHz,  $\text{CDCl}_3$ ) of **3q**

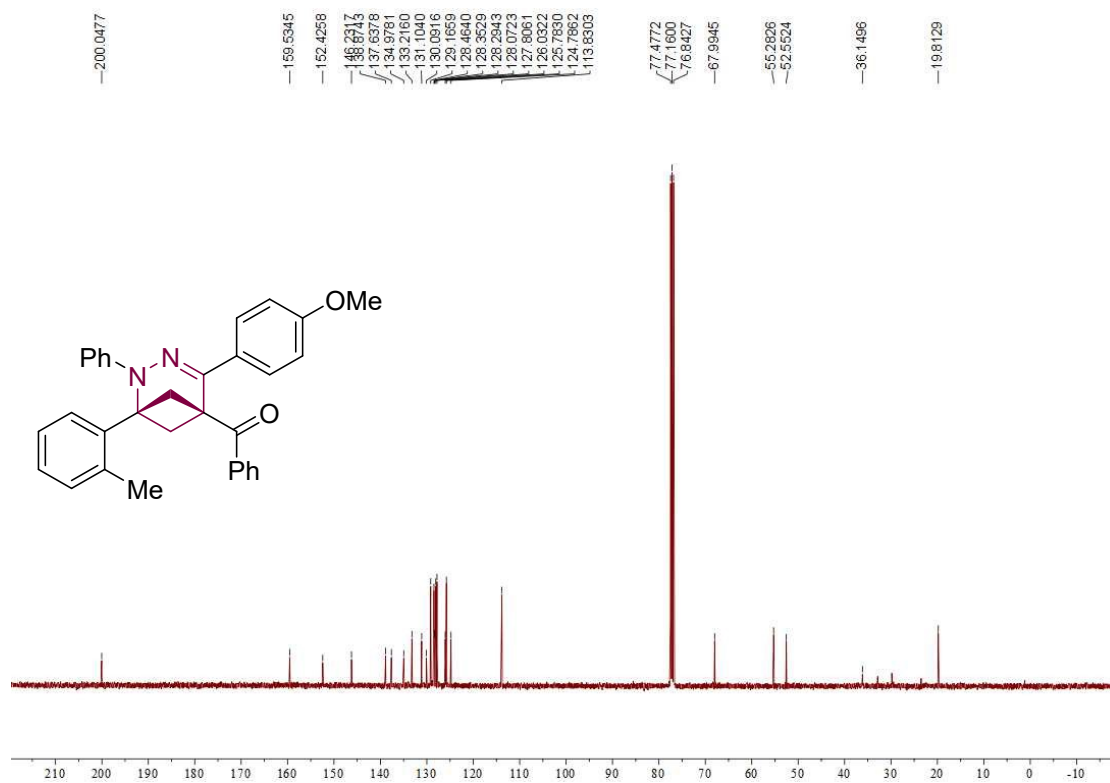

$^1\text{H}$  NMR (400 MHz,  $\text{CDCl}_3$ ) of **3r**

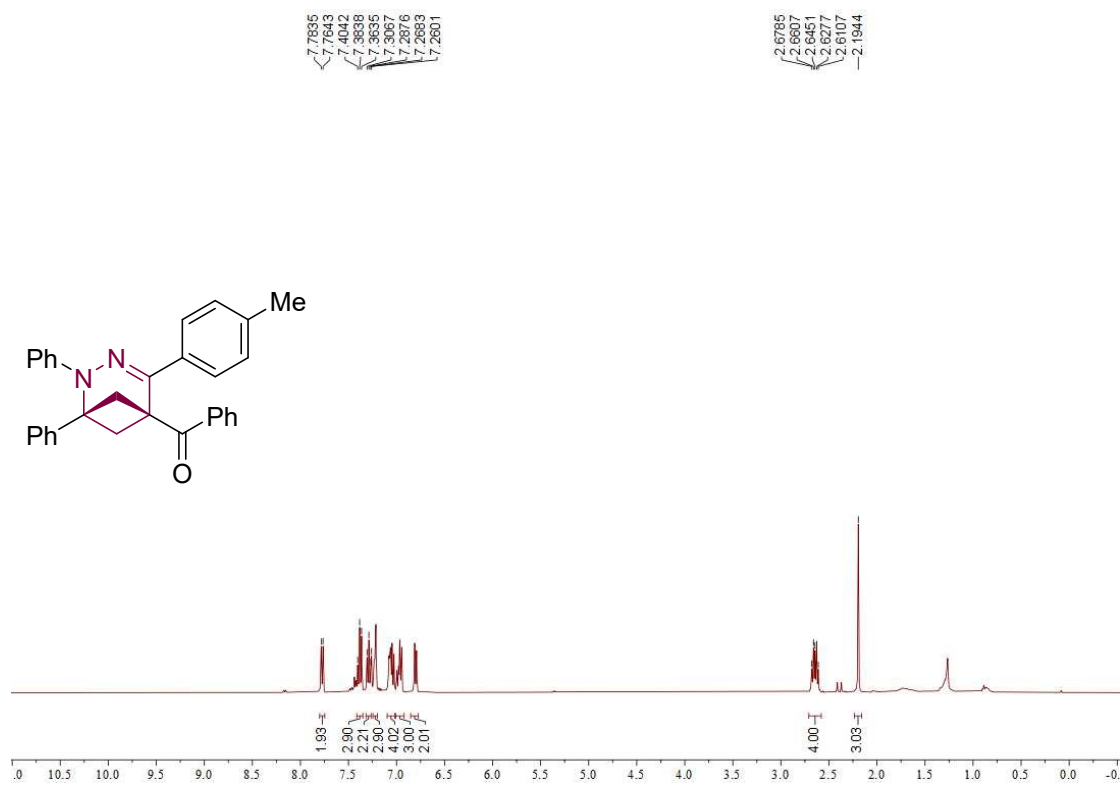

$^{13}\text{C}$  NMR (101 MHz,  $\text{CDCl}_3$ ) of **3r**

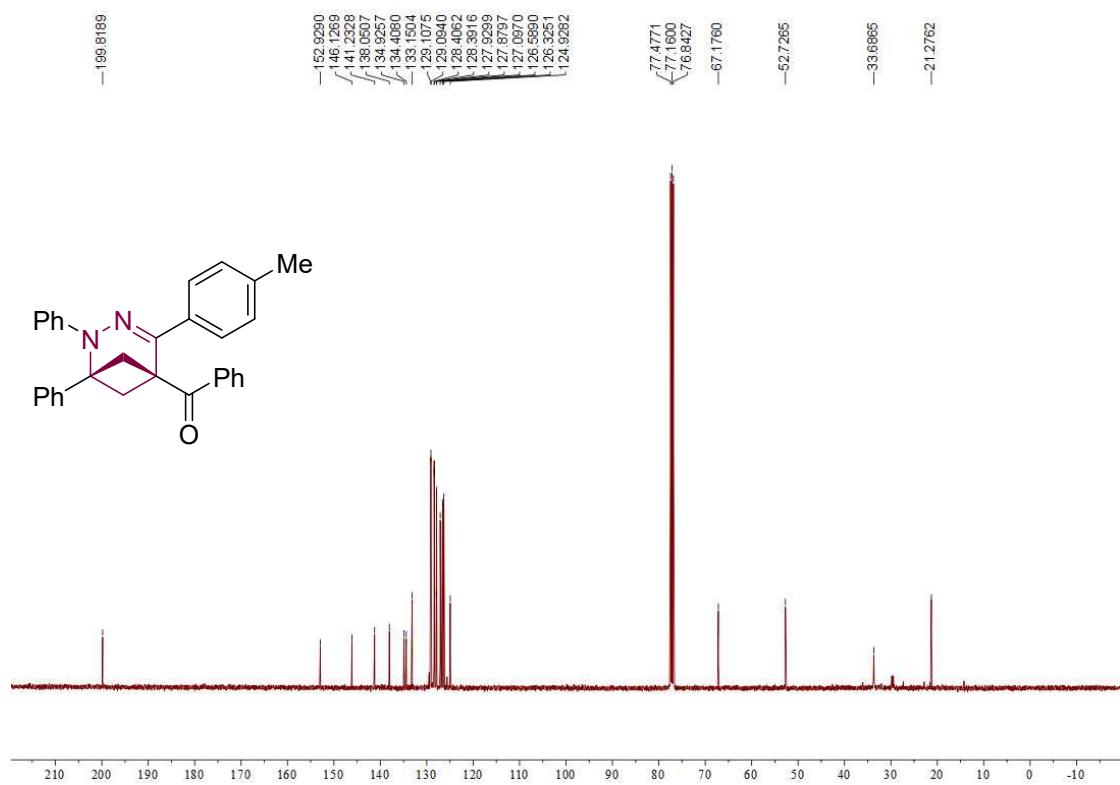



$^1\text{H}$  NMR (400 MHz,  $\text{CDCl}_3$ ) of **3s**

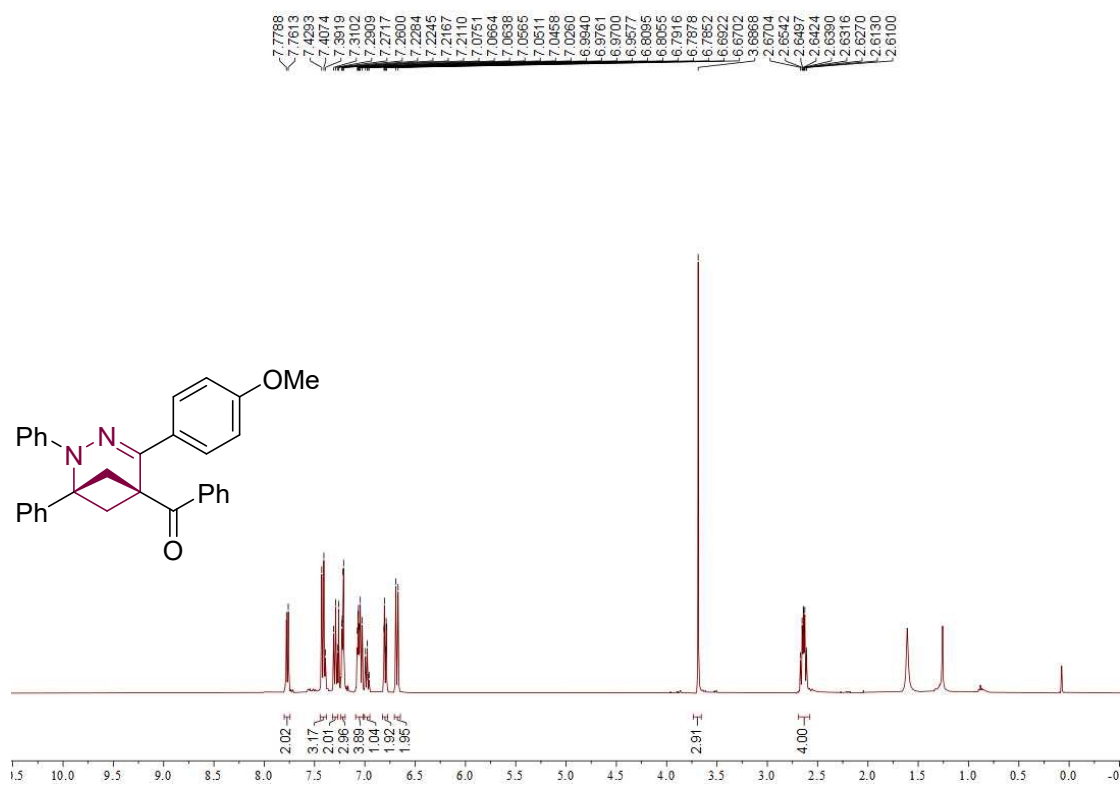

$^{13}\text{C}$  NMR (101 MHz,  $\text{CDCl}_3$ ) of **3s**

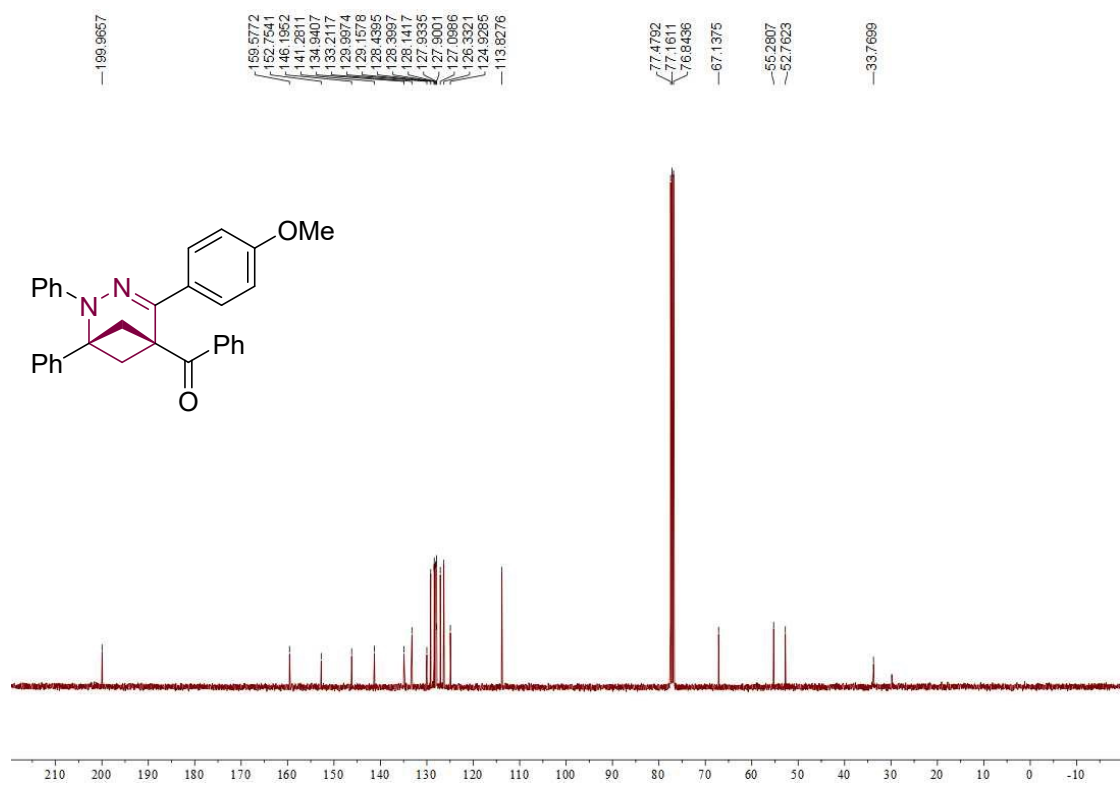

$^1\text{H}$  NMR (400 MHz,  $\text{CDCl}_3$ ) of **3t**

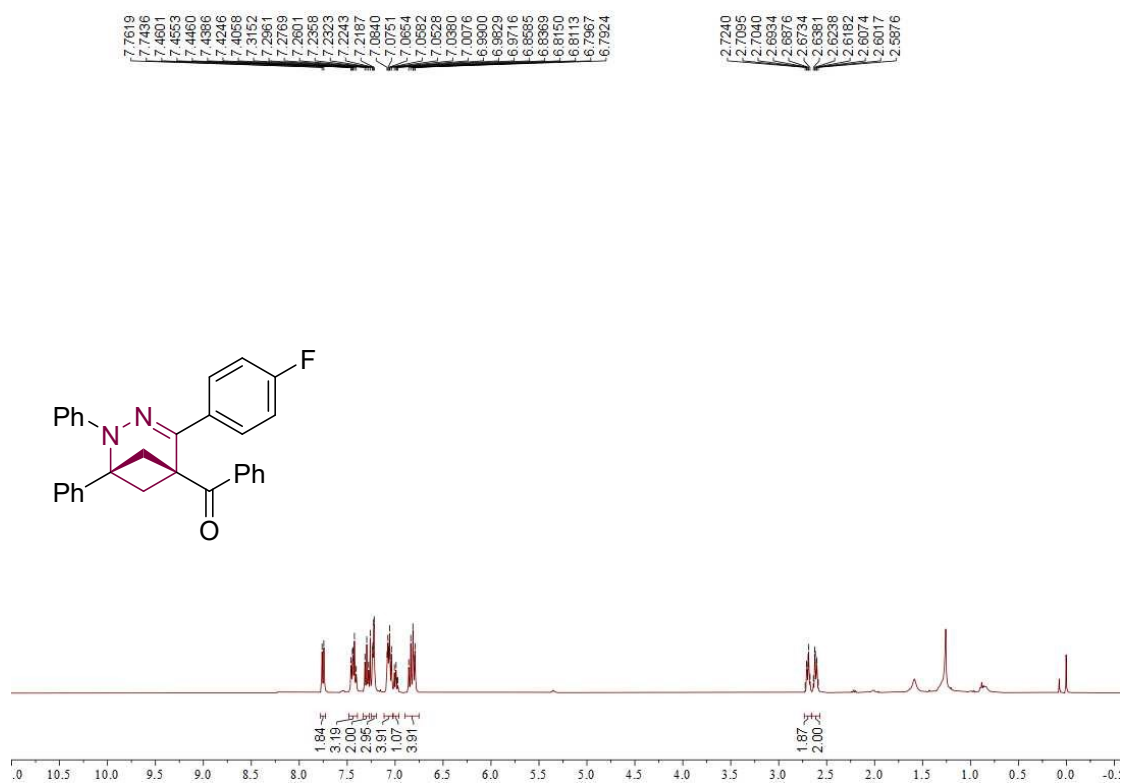

$^{13}\text{C}$  NMR (101 MHz,  $\text{CDCl}_3$ ) of **3t**

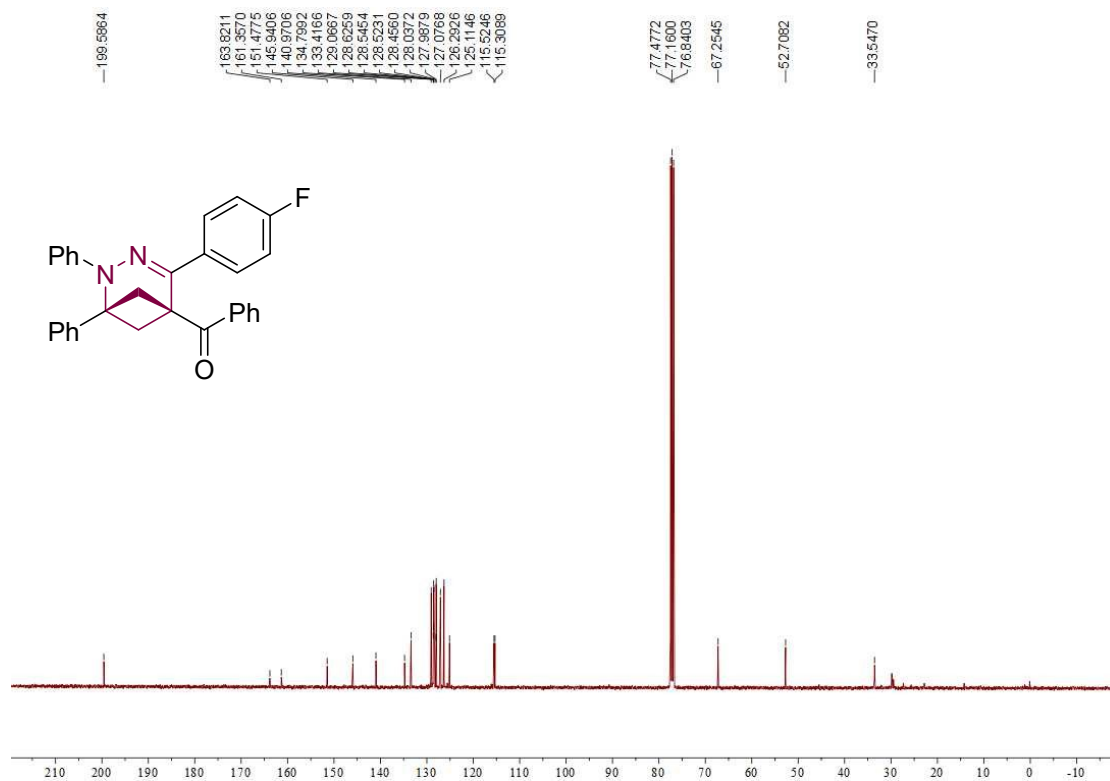

$^{19}\text{F}$  NMR (376 MHz,  $\text{CDCl}_3$ ) of **3t**

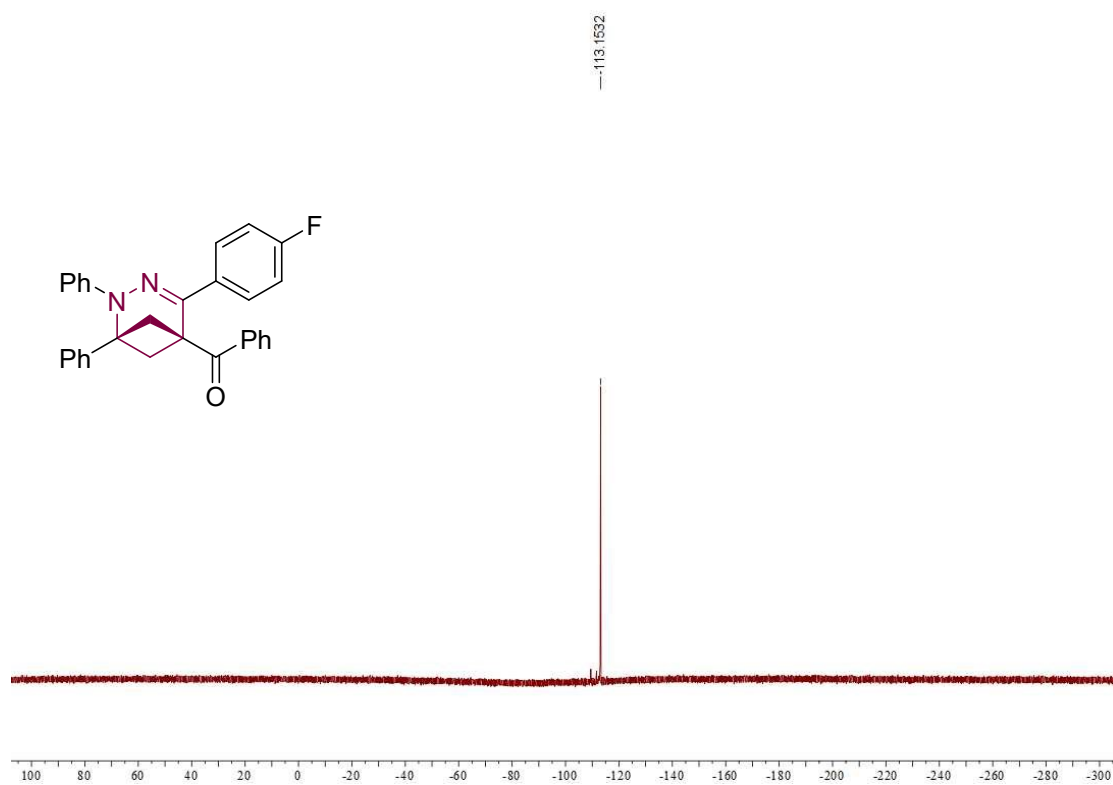

<sup>1</sup>H NMR (400 MHz, CDCl<sub>3</sub>) of **3u**

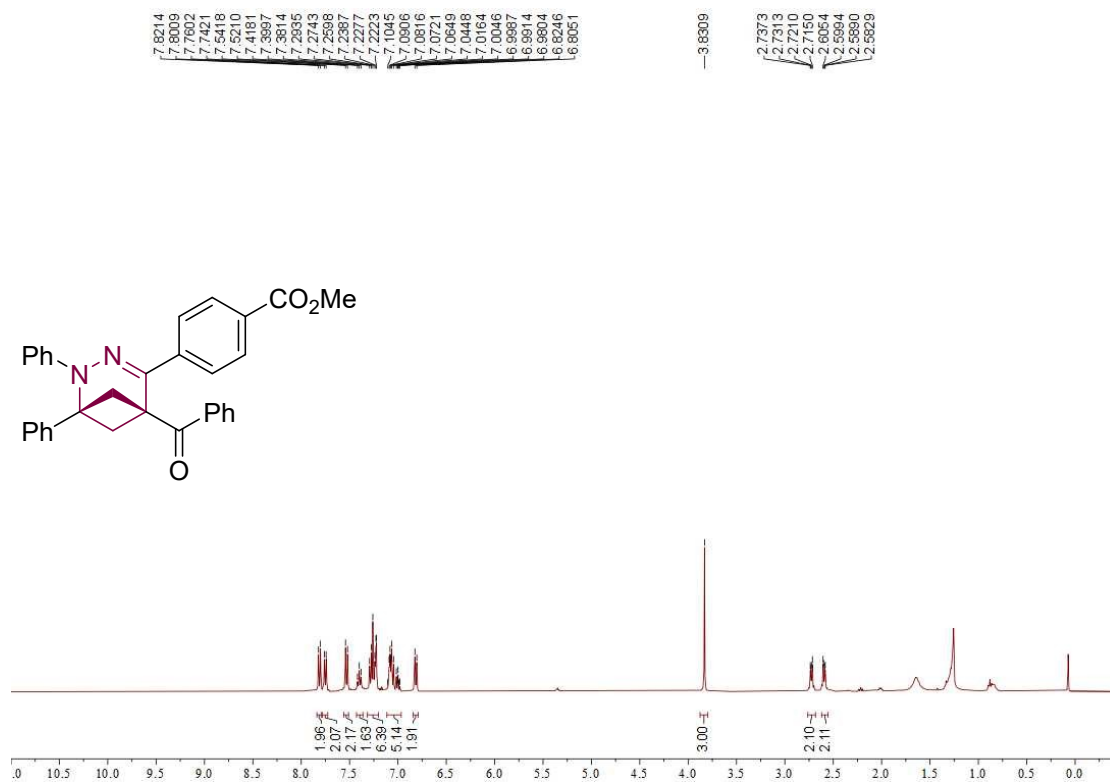

<sup>13</sup>C NMR (101 MHz, CDCl<sub>3</sub>) of **3u**

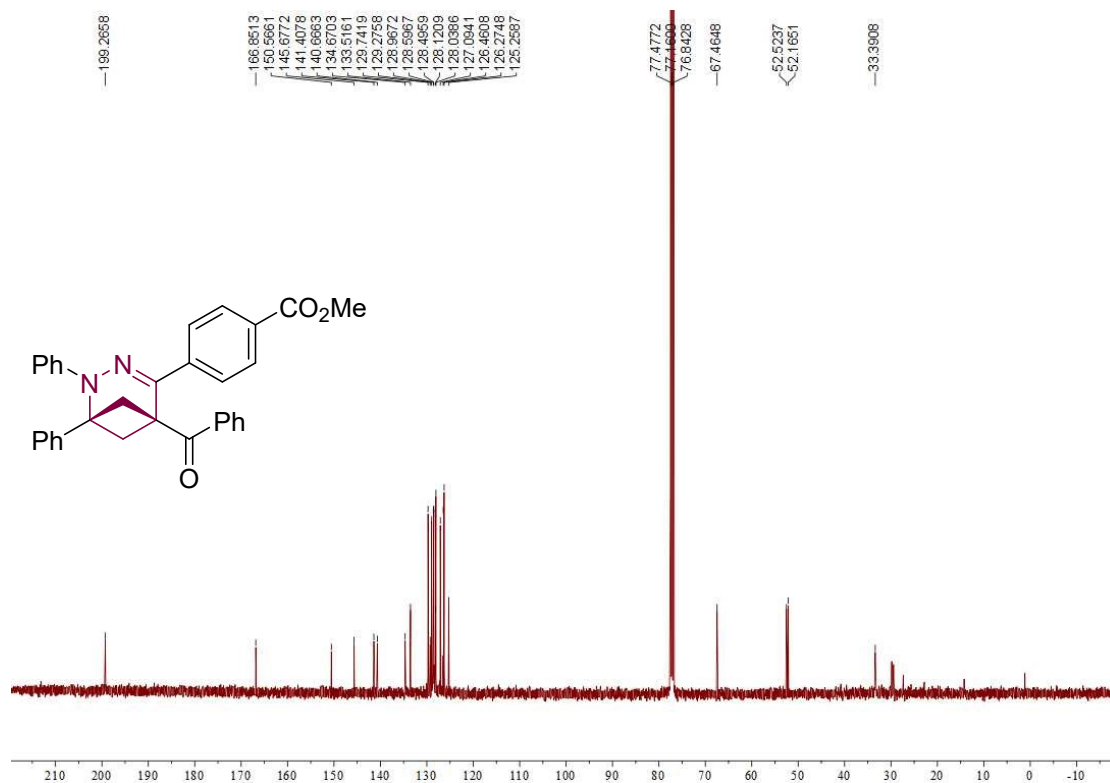

$^1\text{H}$  NMR (400 MHz,  $\text{CDCl}_3$ ) of **3v**

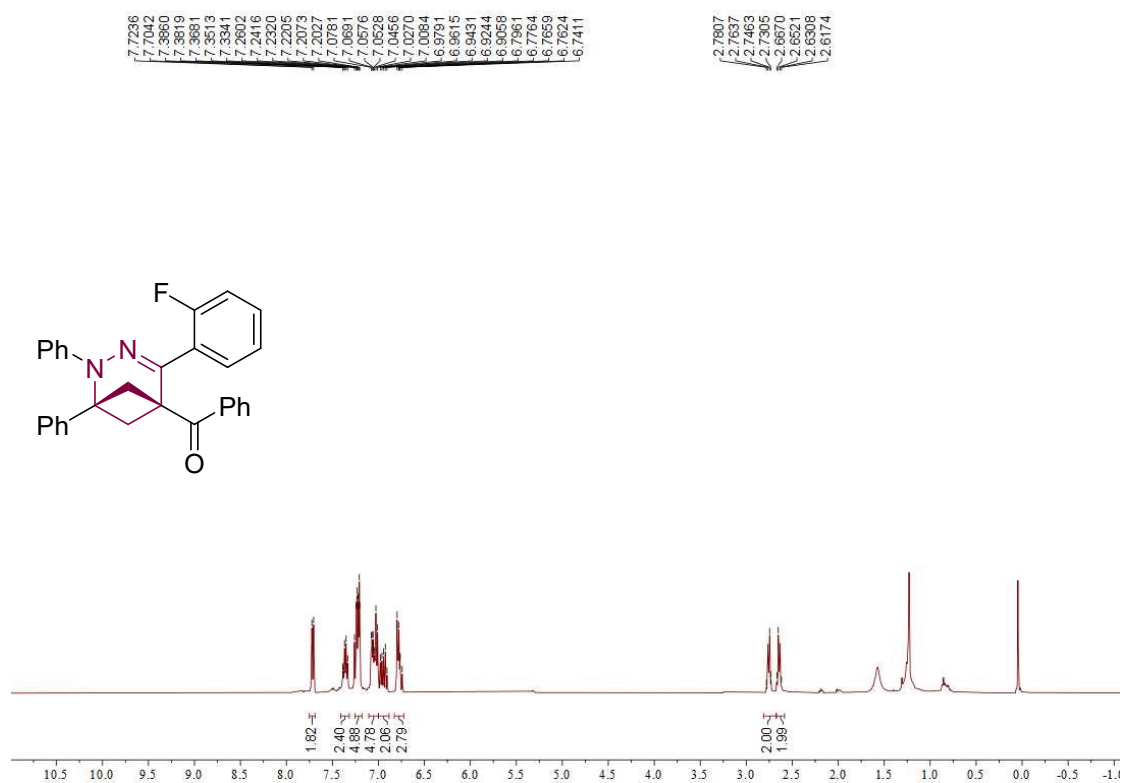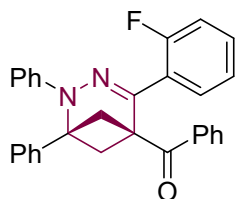

$^{13}\text{C}$  NMR (101 MHz,  $\text{CDCl}_3$ ) of **3v**

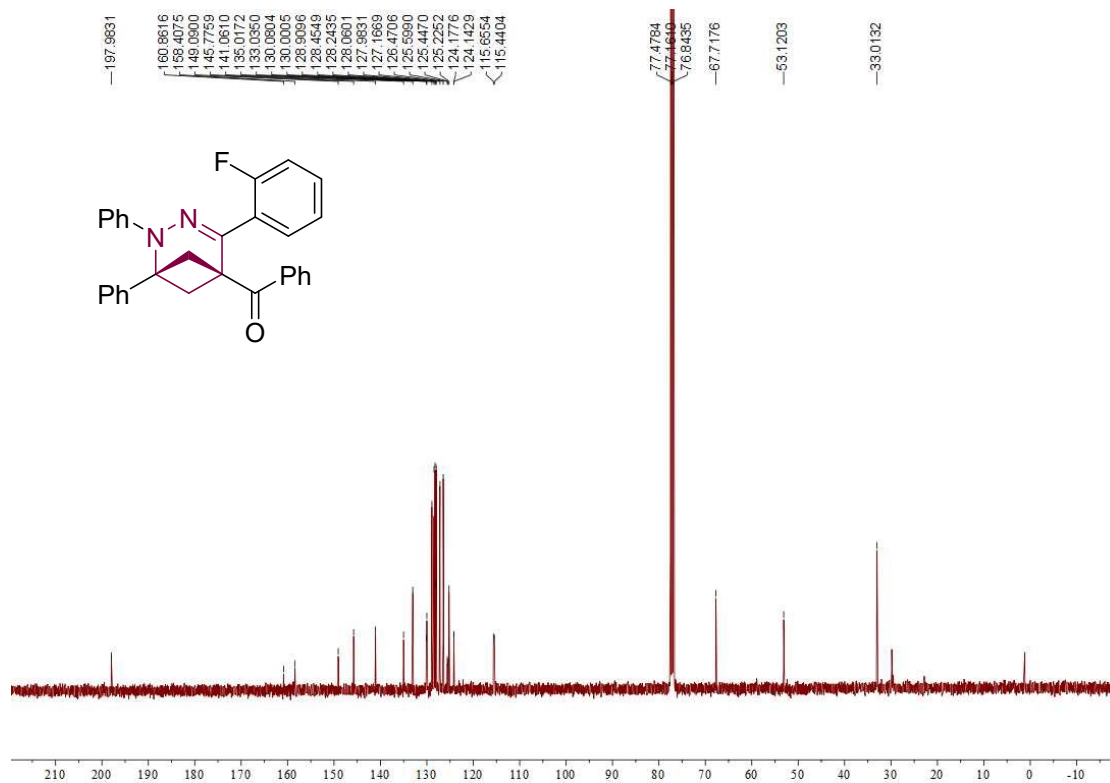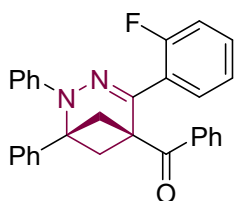

-112.4332

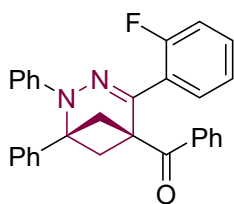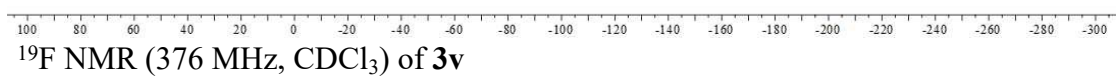

$^{19}\text{F}$  NMR (376 MHz,  $\text{CDCl}_3$ ) of **3v**

$^1\text{H}$  NMR (400 MHz,  $\text{CDCl}_3$ ) of **3w**

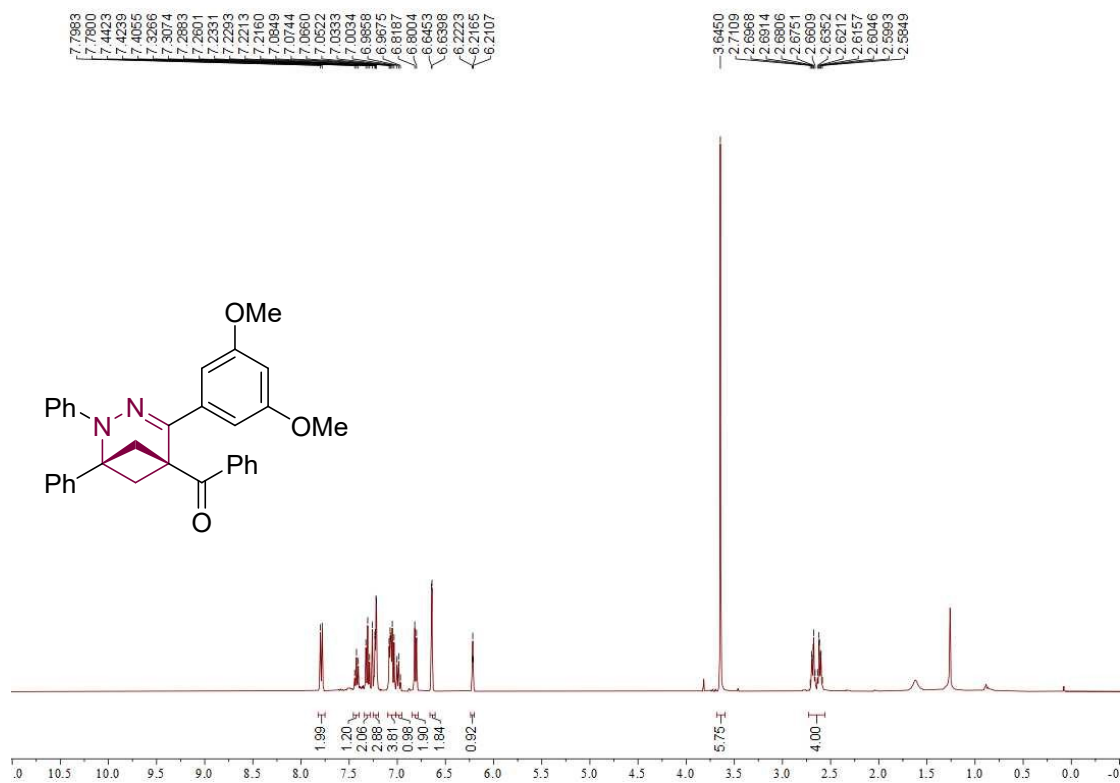

$^{13}\text{C}$  NMR (101 MHz,  $\text{CDCl}_3$ ) of **3w**

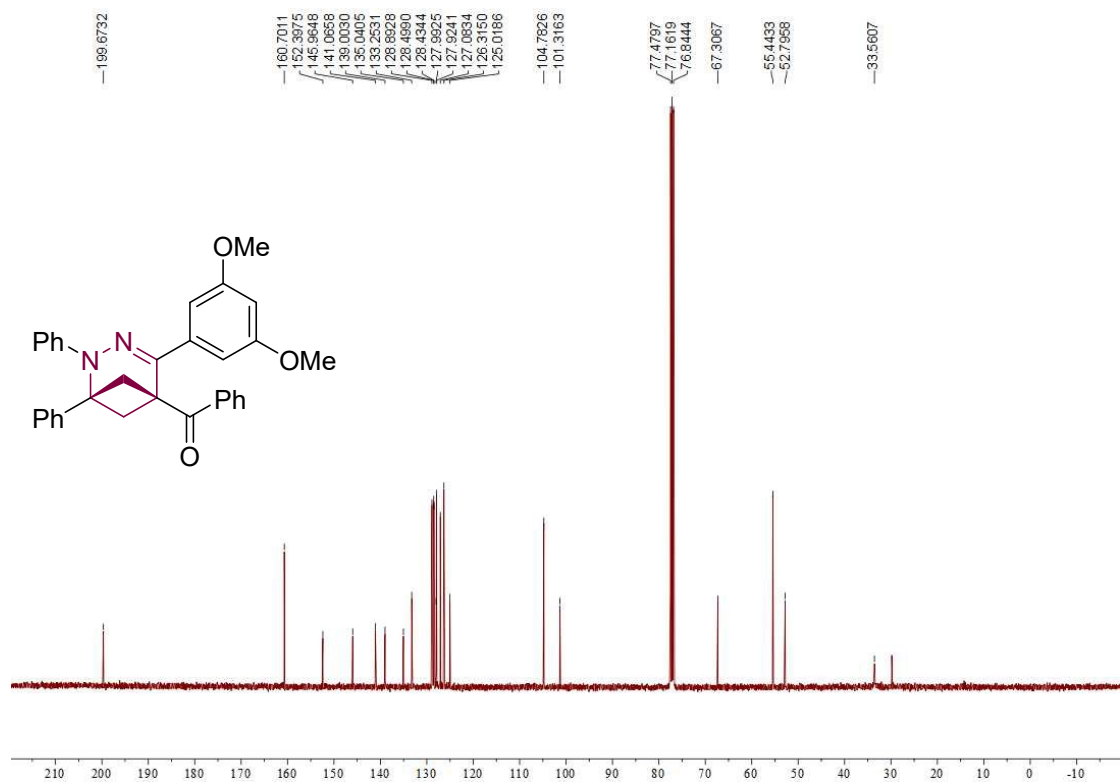

$^1\text{H}$  NMR (400 MHz,  $\text{CDCl}_3$ ) of **3x**

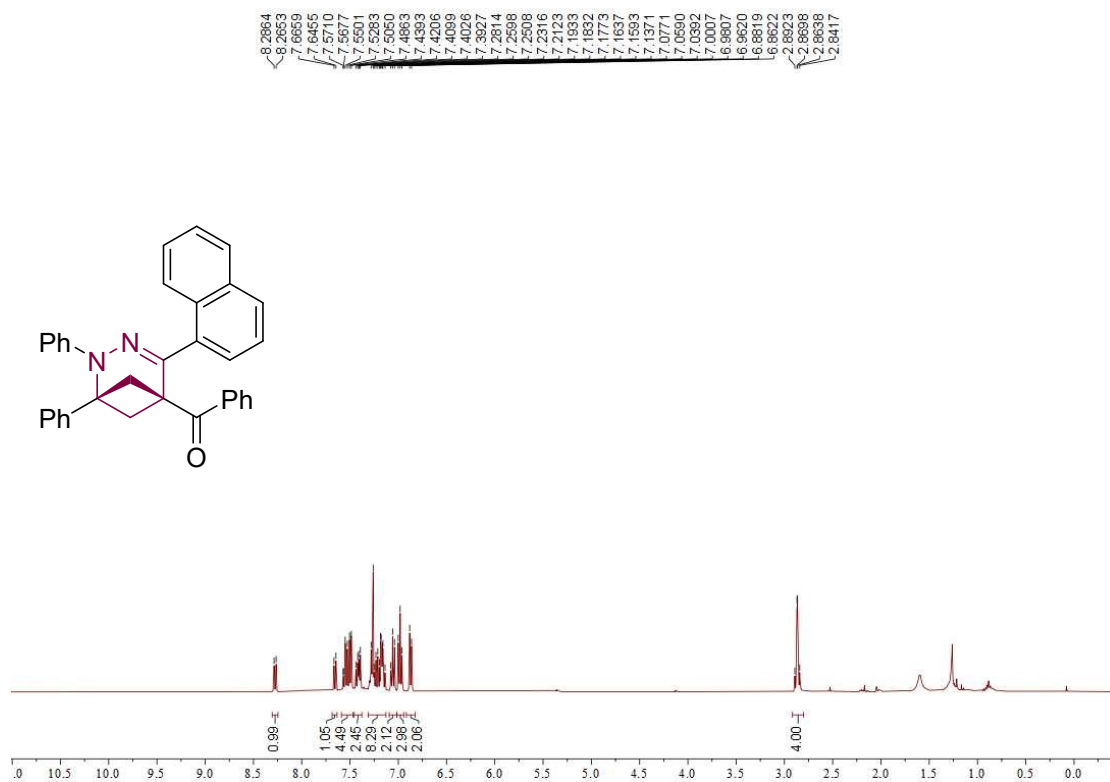

$^{13}\text{C}$  NMR (101 MHz,  $\text{CDCl}_3$ ) of **3x**

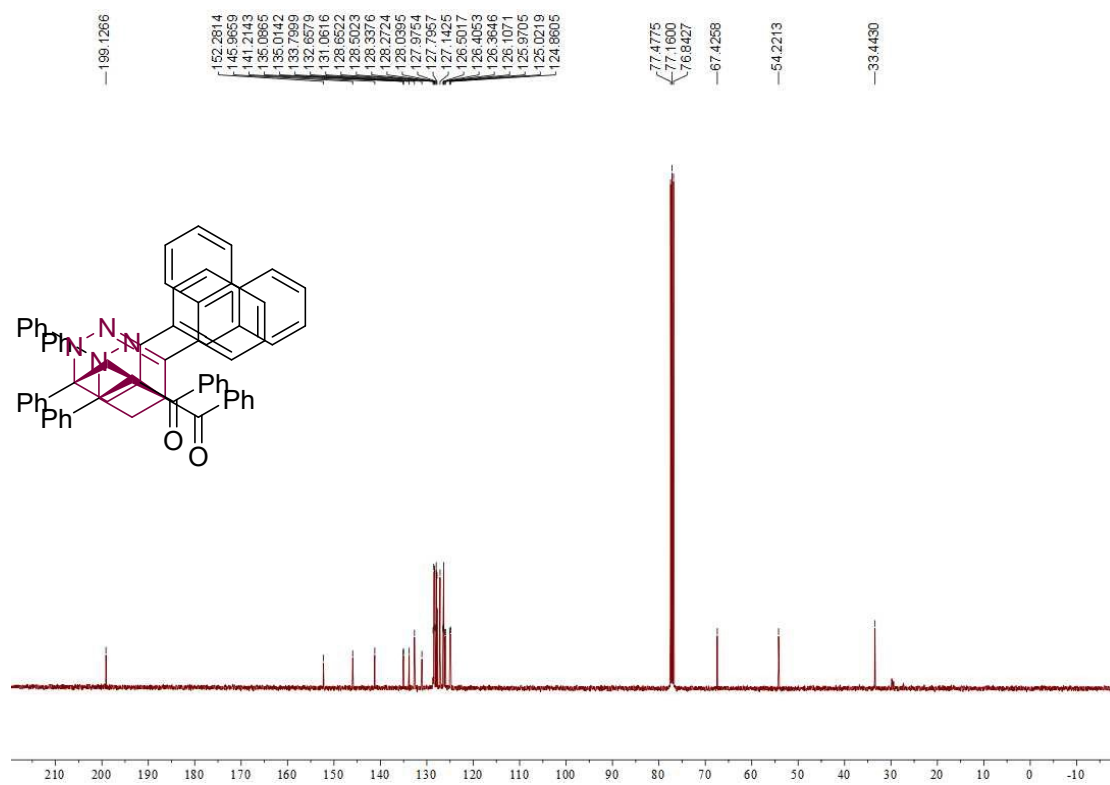

$^1\text{H}$  NMR (400 MHz,  $\text{CDCl}_3$ ) of **3y**



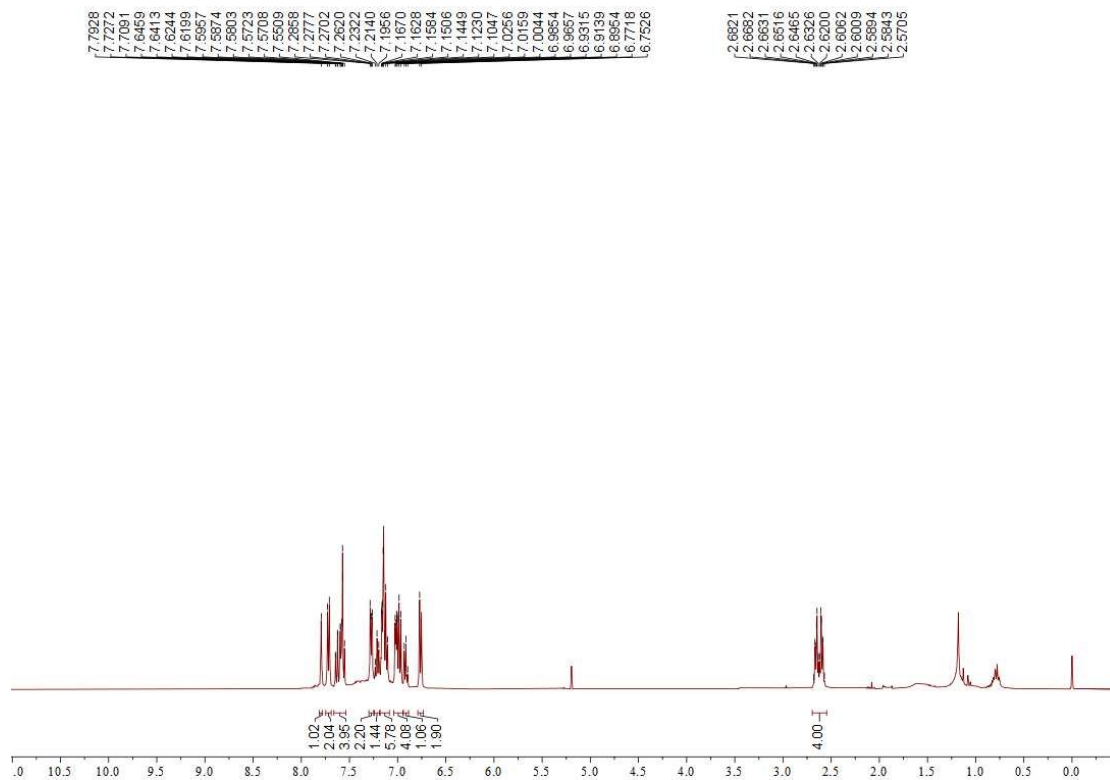

$^{13}\text{C}$  NMR (101 MHz,  $\text{CDCl}_3$ ) of **3y**

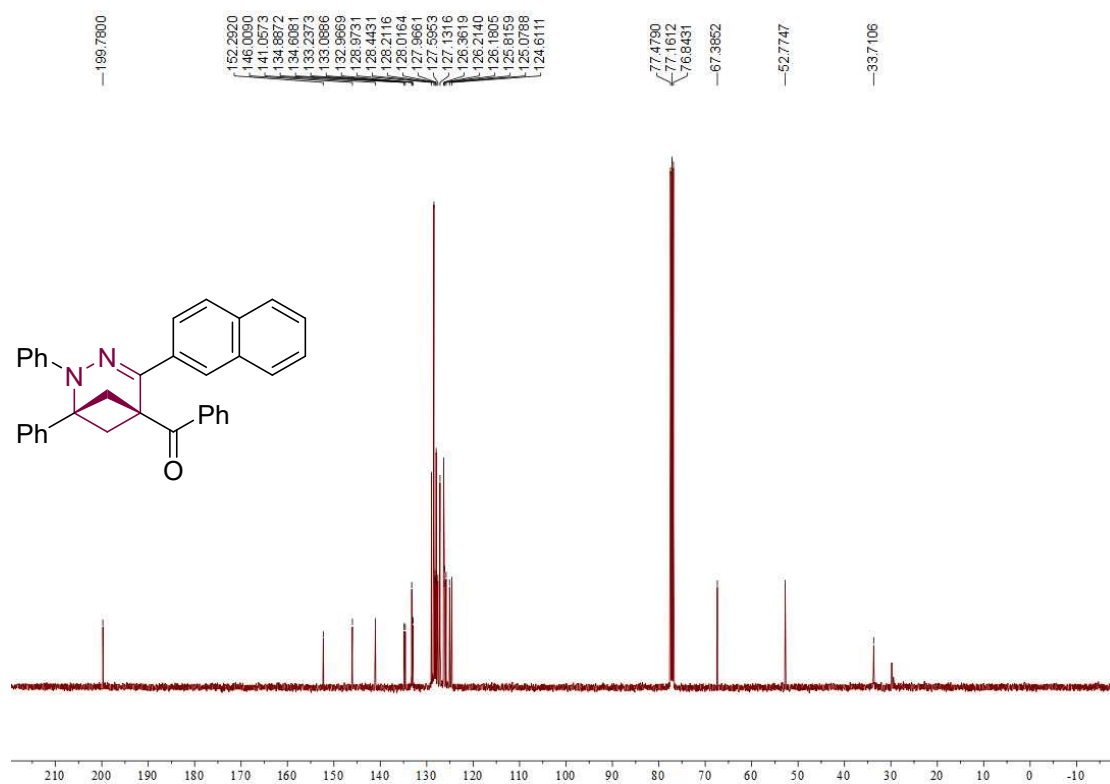

$^1\text{H}$  NMR (400 MHz,  $\text{CDCl}_3$ ) of **3z**

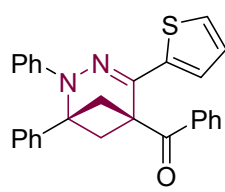

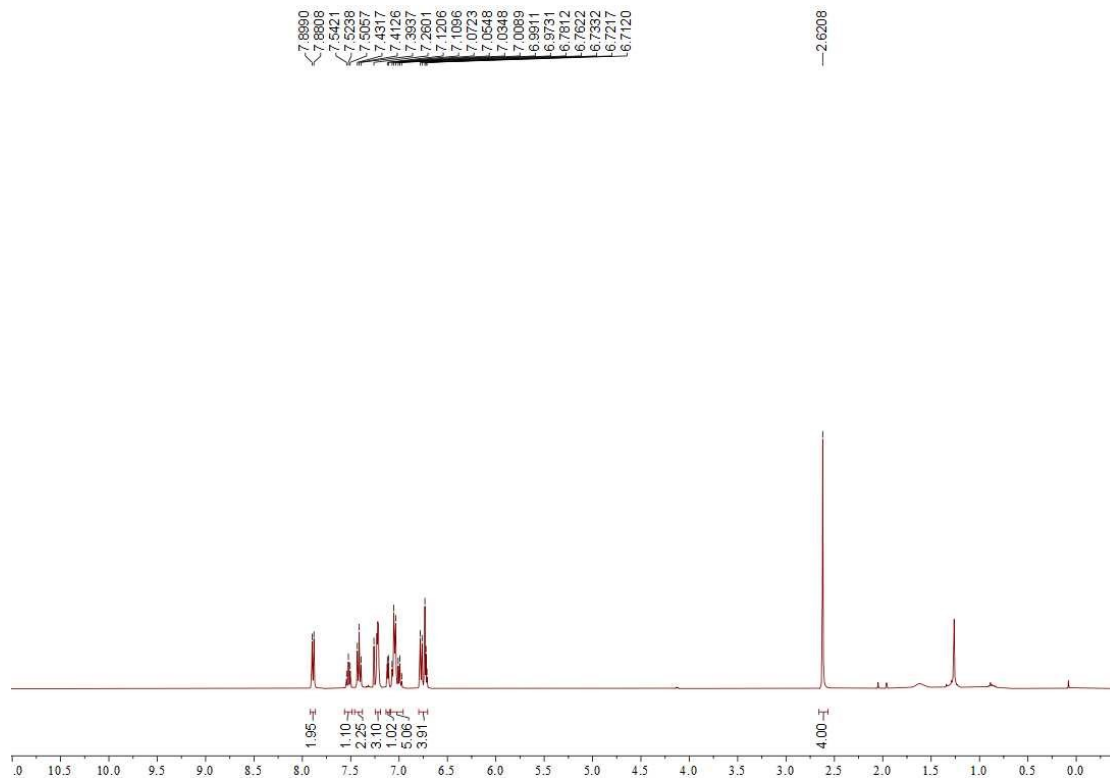

$^{13}\text{C}$  NMR (101 MHz,  $\text{CDCl}_3$ ) of **3z**

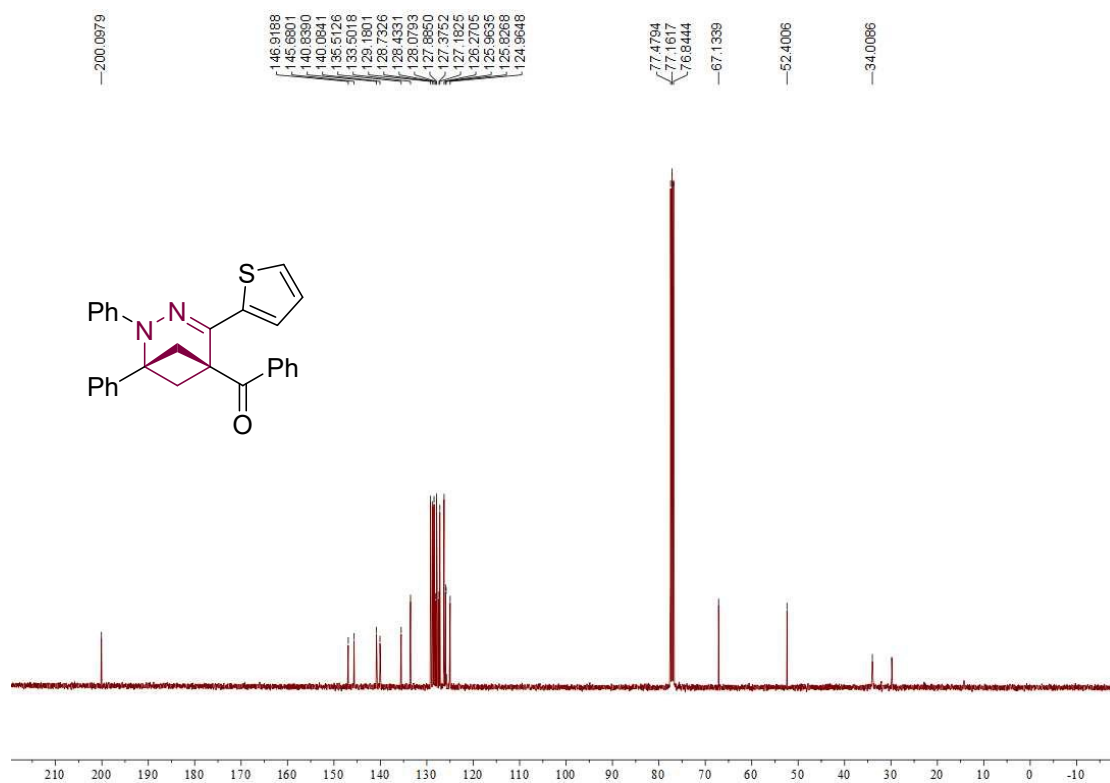

$^1\text{H}$  NMR (400 MHz,  $\text{CDCl}_3$ ) of **3aa**

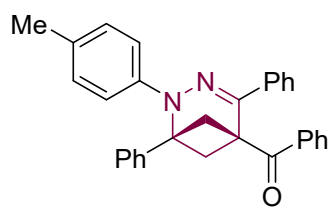

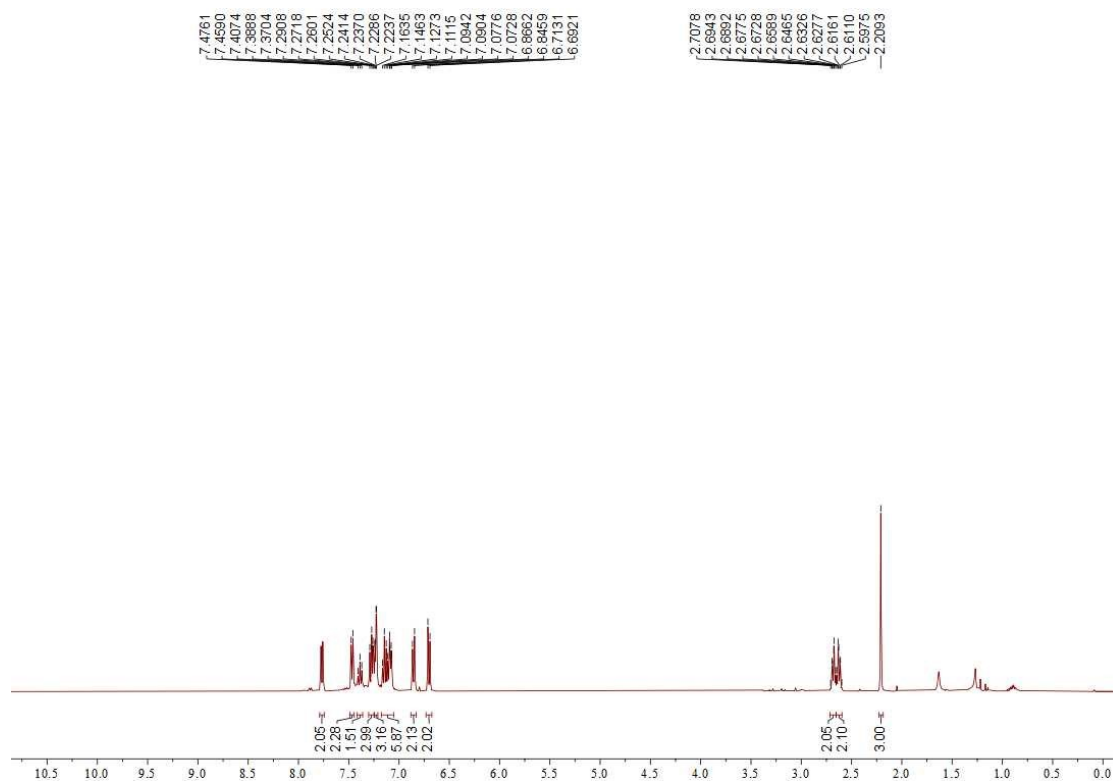

$^{13}\text{C}$  NMR (101 MHz,  $\text{CDCl}_3$ ) of **3aa**

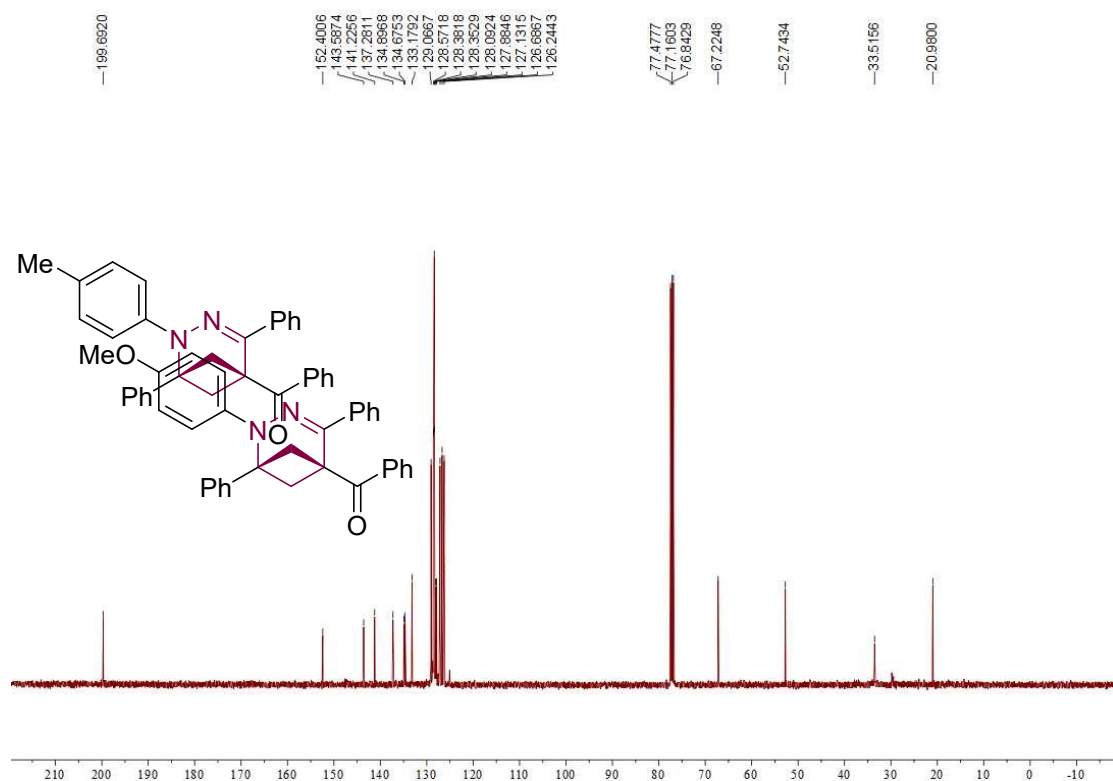

$^1\text{H}$  NMR (400 MHz,  $\text{CDCl}_3$ ) of **3ab**

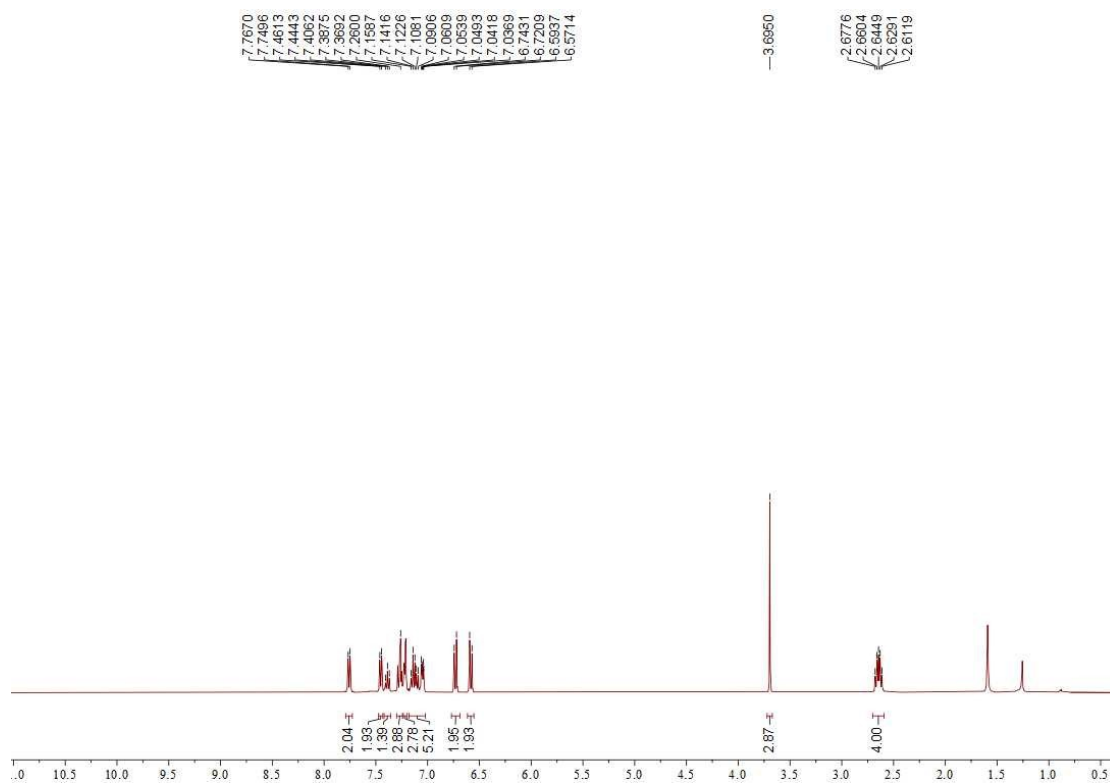

$^{13}\text{C}$  NMR (101 MHz,  $\text{CDCl}_3$ ) of **3ab**

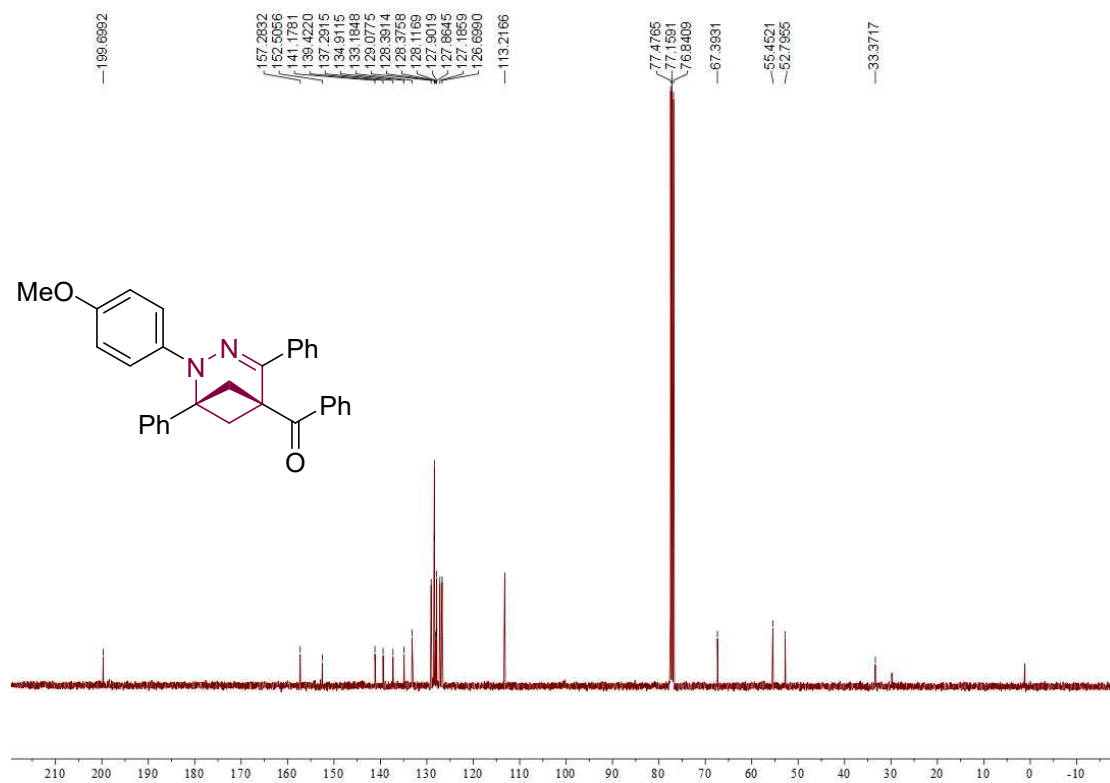

$^1\text{H}$  NMR (400 MHz,  $\text{CDCl}_3$ ) of **3ac**

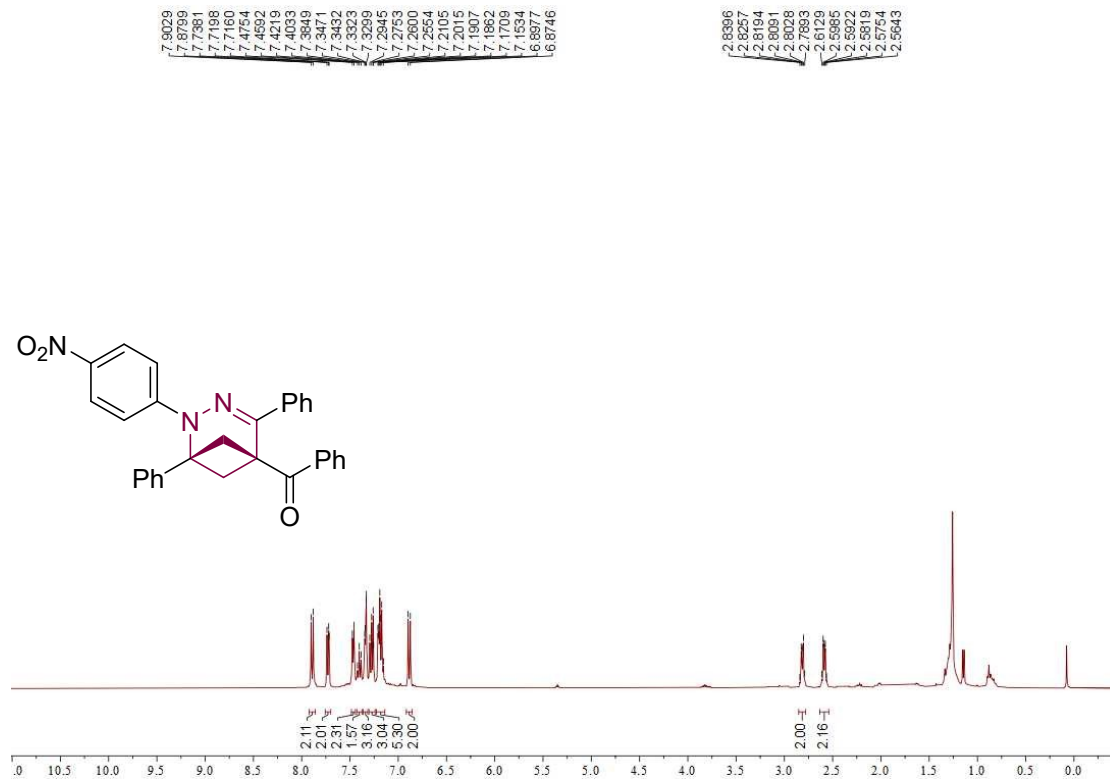

$^{13}\text{C}$  NMR (101 MHz,  $\text{CDCl}_3$ ) of **3ac**

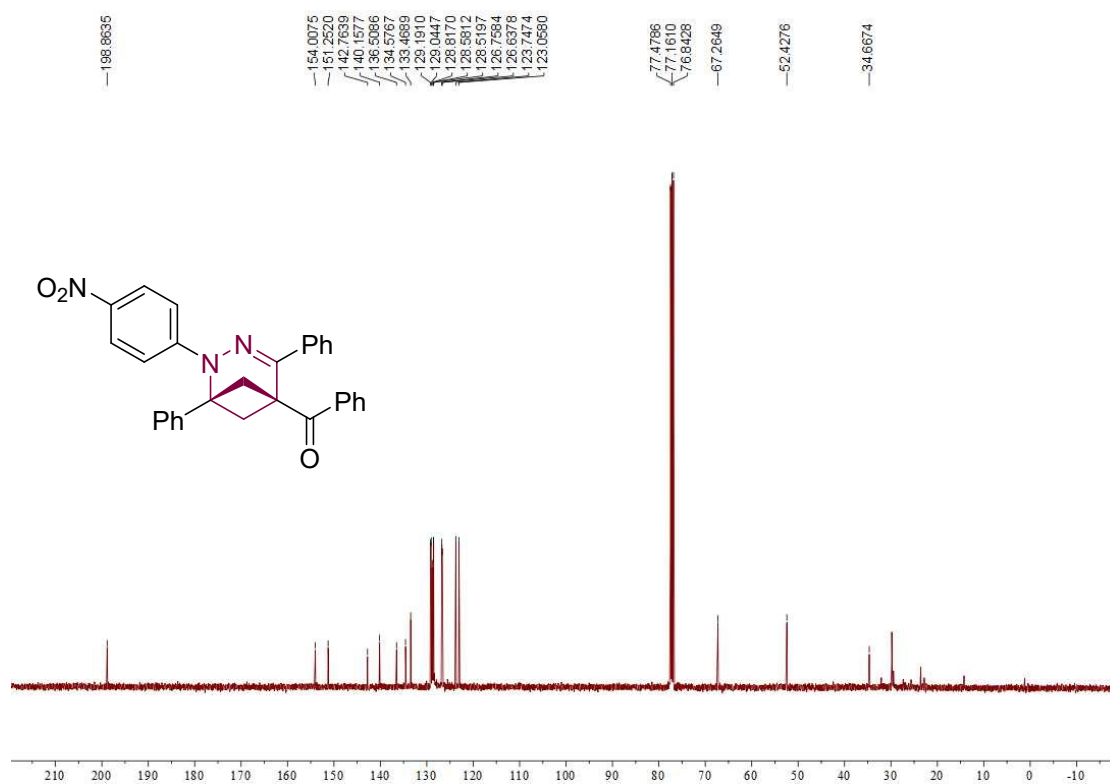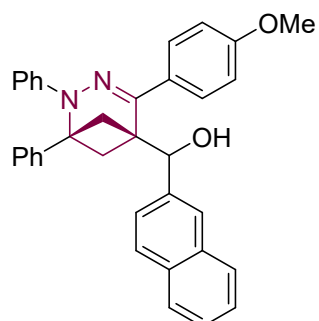

$^1\text{H}$  NMR (400 MHz, DMSO) of **5**

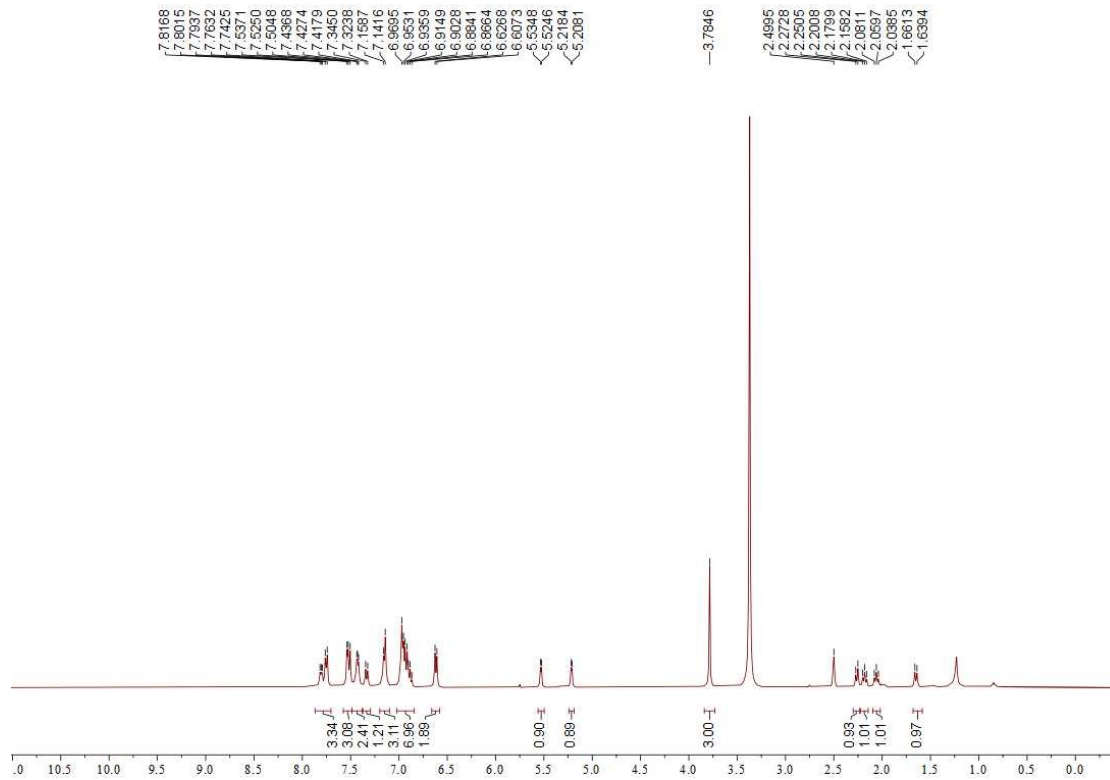

$^{13}\text{C}$  NMR (101 MHz, DMSO) of **5**

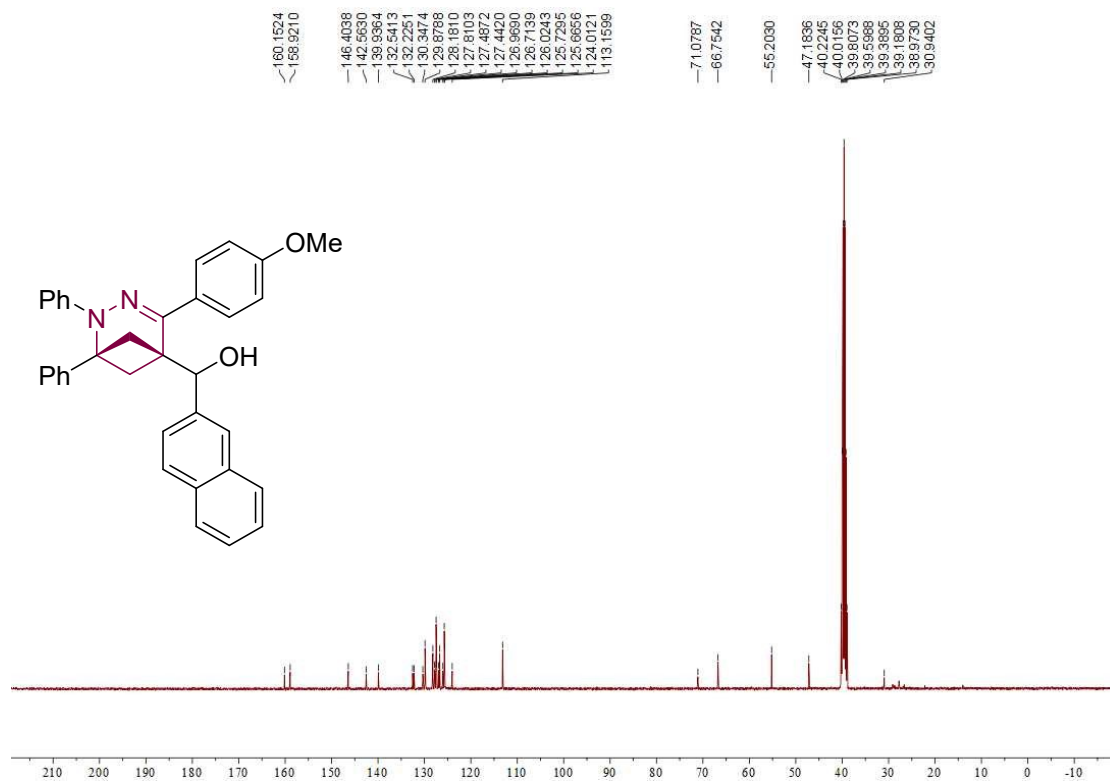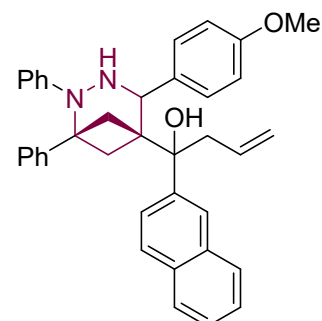

$^1\text{H}$  NMR (400 MHz,  $\text{CDCl}_3$ ) of **6**

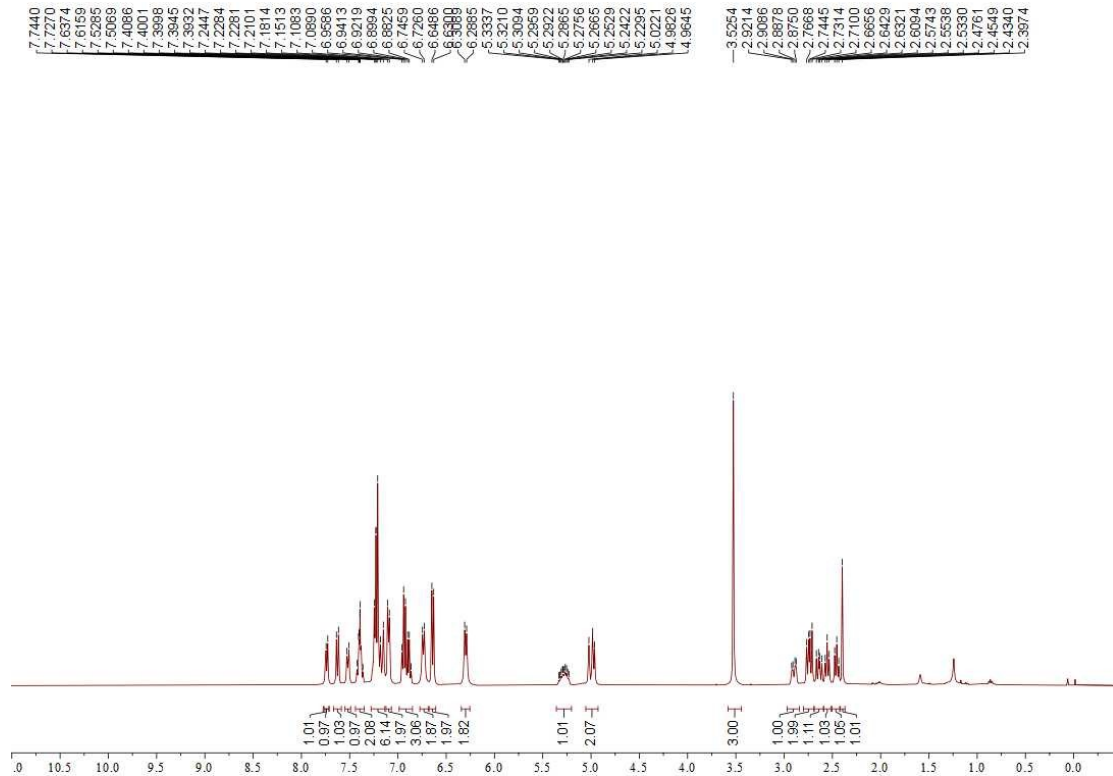

$^{13}\text{C}$  NMR (101 MHz,  $\text{CDCl}_3$ ) of **6**

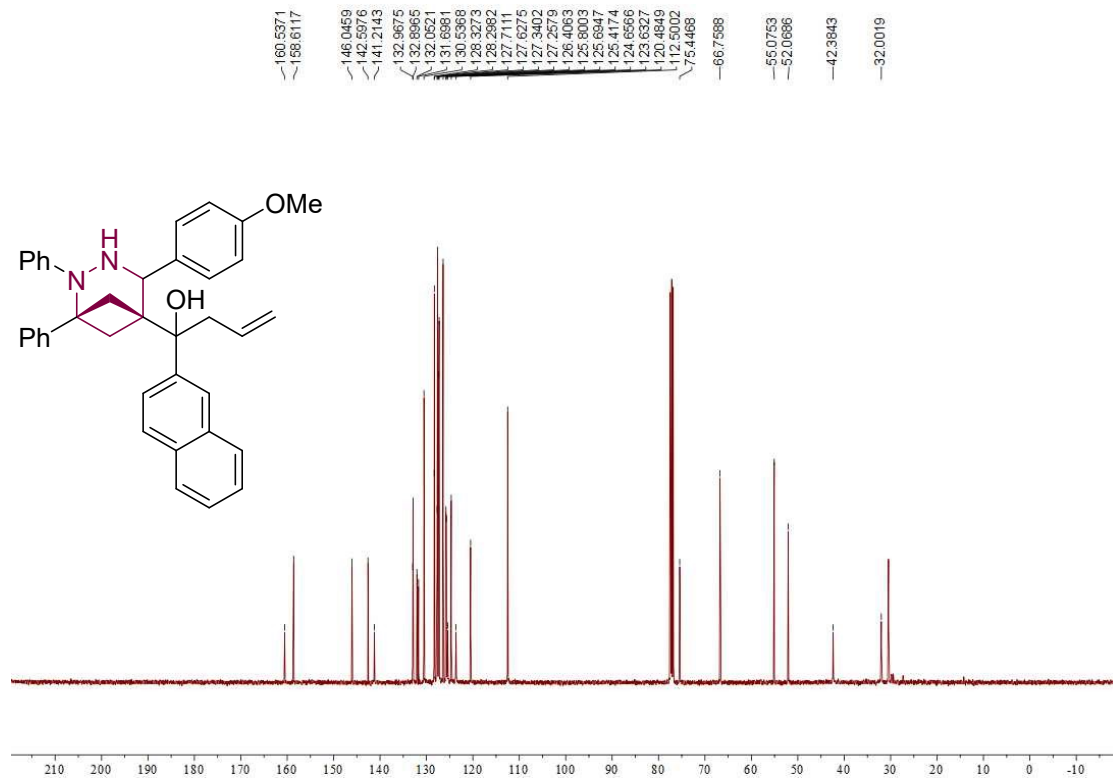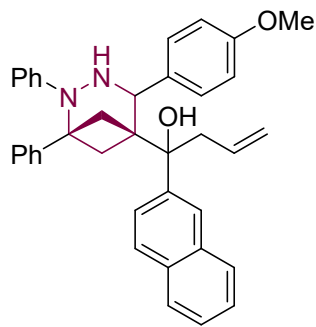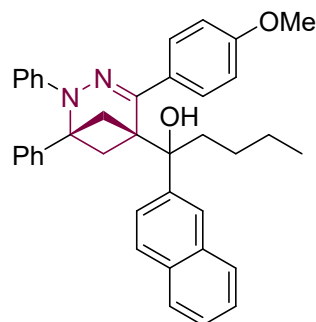

$^1\text{H}$  NMR (400 MHz,  $\text{CDCl}_3$ ) of **7**

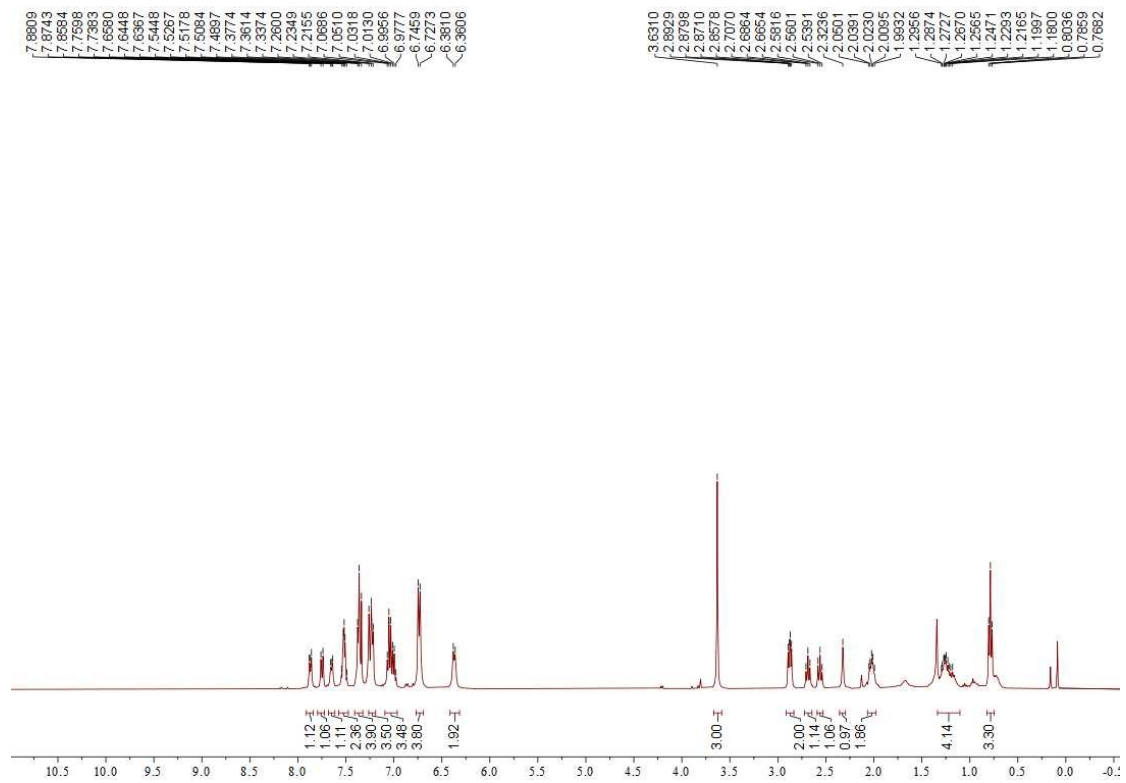

$^{13}\text{C}$  NMR (101 MHz,  $\text{CDCl}_3$ ) of **7**

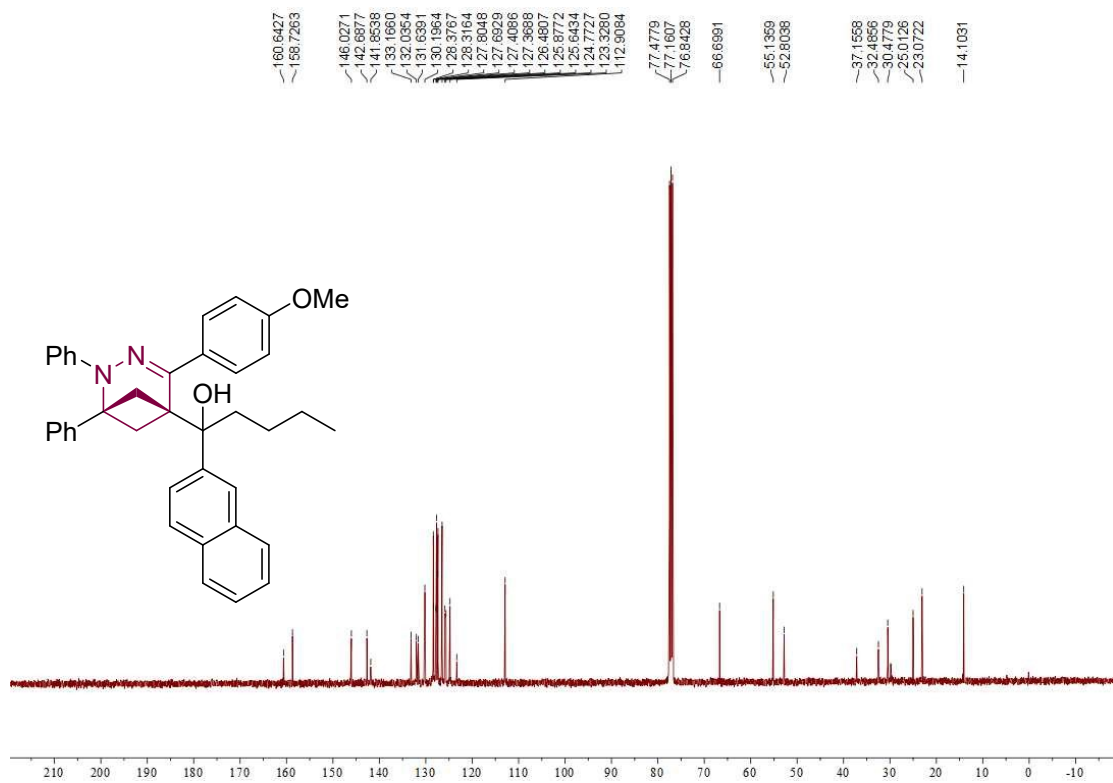

$^1\text{H}$  NMR (400 MHz,  $\text{CDCl}_3$ ) of **8**

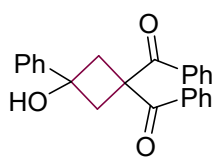



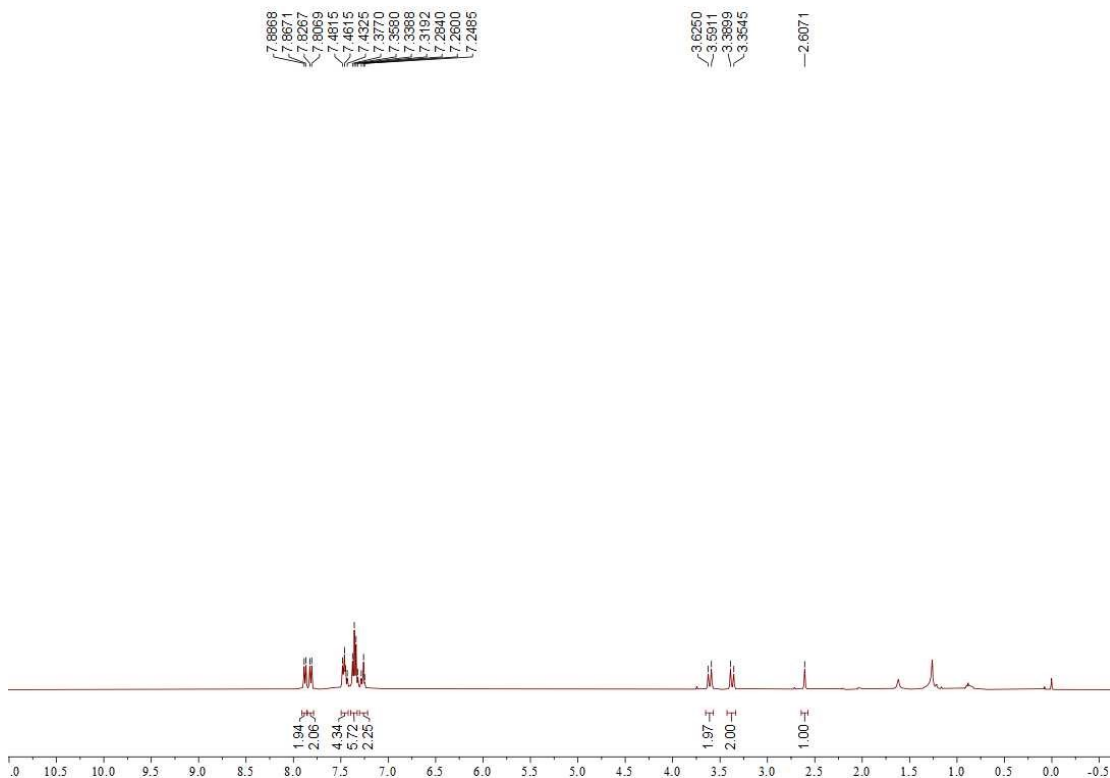

$^{13}\text{C}$  NMR (101 MHz,  $\text{CDCl}_3$ ) of **8**

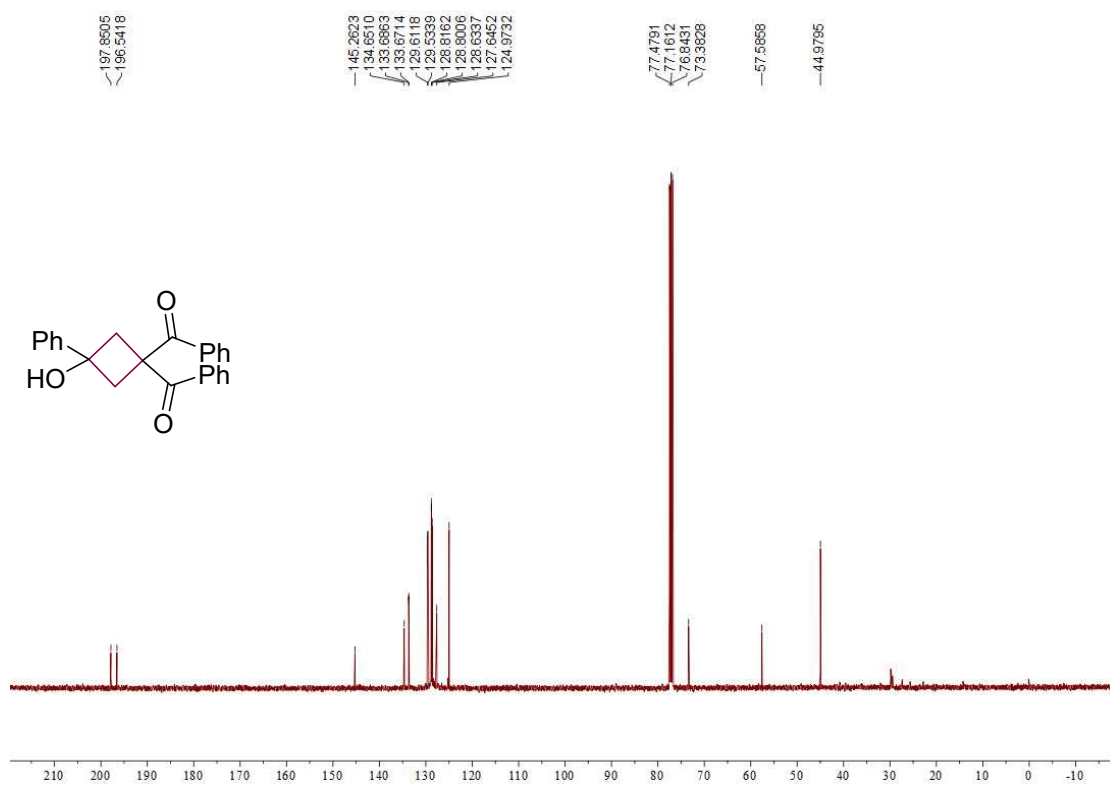

$^1\text{H}$  NMR (400 MHz,  $\text{CDCl}_3$ ) of **9**

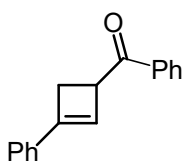

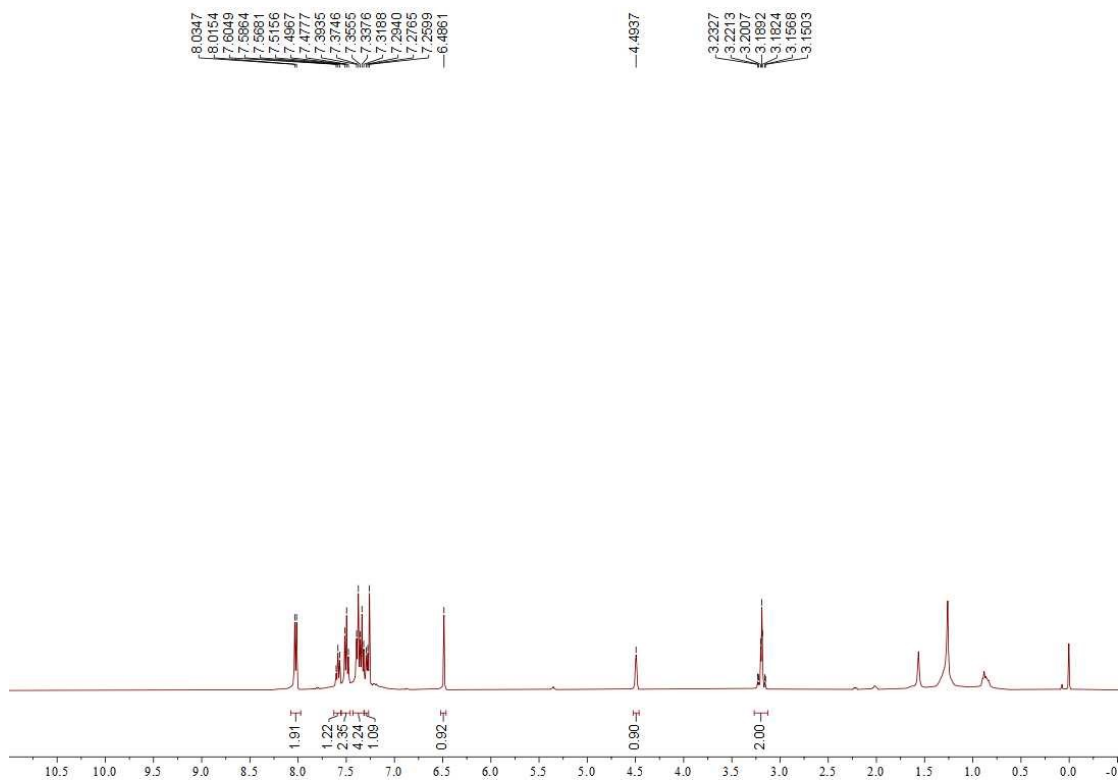

$^{13}\text{C}$  NMR (101 MHz,  $\text{CDCl}_3$ ) of **9**

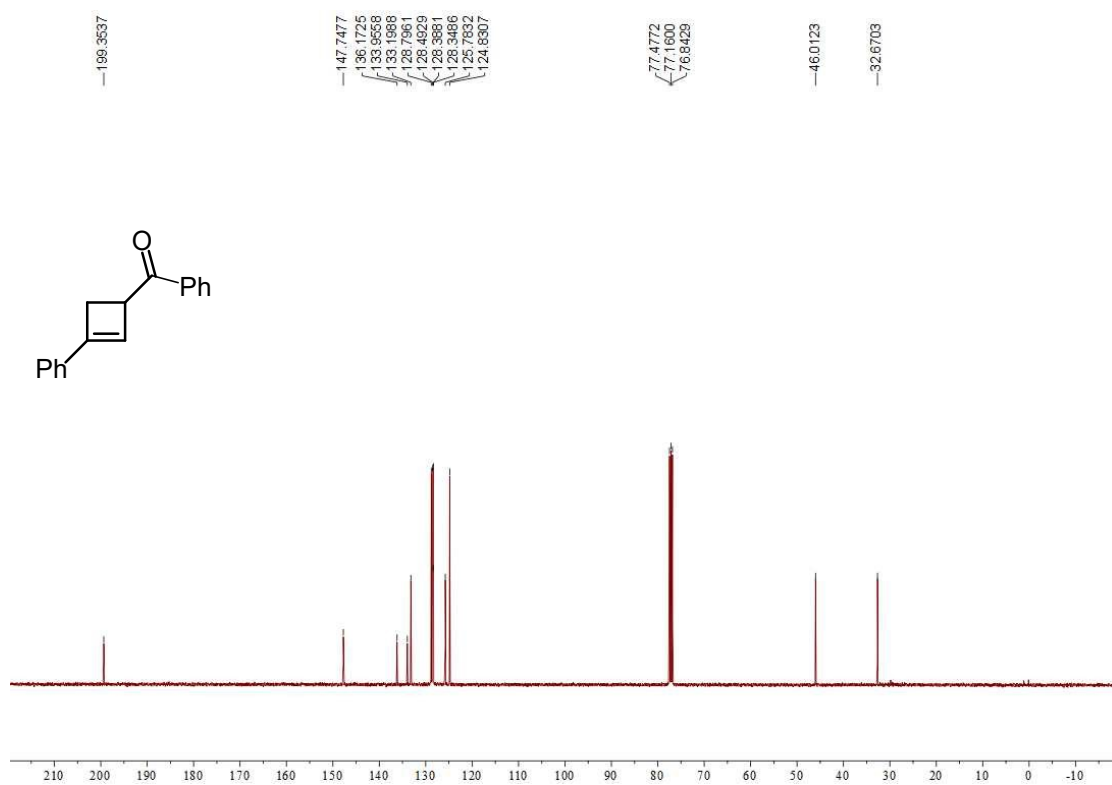

Supplement: d4sc08280j1.pdf [file d4sc08280j1.pdf]
